# Supplementary material
Source: PubMed Central journal article supplement (PMC2847863)

## Supporting Information

**Alkynes as Equivalent of  $\alpha$ -Diazo Ketones in Generating  $\alpha$ -Oxo Metal Carbenes: A Gold-Catalyzed Expedient Access to Dihydrofuran-3-ones**

Longwu Ye, Li Cui, Guozhu Zhang and Liming Zhang

Department of Chemistry and Biochemistry,  
University of California, Santa Barbara, California, 93106

| <b>Content</b>                                                            | <b>Page number</b> |
|---------------------------------------------------------------------------|--------------------|
| <b>General</b>                                                            | 2                  |
| <b>Preparation of Starting Materials</b>                                  | 2                  |
| <b>General Procedure: Gold Catalysis</b>                                  | 12                 |
| <b><math>^1\text{H}</math> and <math>^{13}\text{C}</math> NMR spectra</b> | 23                 |

**General.** Ethyl acetate (ACS grade), hexanes (ACS grade) and diethyl ether (ACS grade) were purchased from Fisher Scientific and used without further purification. Anhydrous 1, 2-dichloroethane (HPLC grade) was purified by distillation over calcium hydride. Anhydrous tetrahydrofuran in Pure-Pac™ from Aldrich was used directly without further purification. Commercially available reagents were used without further purification. Reactions were monitored by thin layer chromatography (TLC) using silicycle pre-coated silica gel plates. Flash column chromatography was performed over silicycle silica gel (230-400 mesh). <sup>1</sup>H NMR and <sup>13</sup>C NMR spectra were recorded on a Varian 500 MHz Unity plus spectrometer and a Varian 400 MHz spectrometer using residue solvent peaks as internal standards. Infrared spectra were recorded with a Perkin Elmer FT-IR spectrum 2000 spectrometer and are reported in reciprocal centimeter (cm<sup>-1</sup>). Mass spectra were recorded with Micromass QTOF2 Quadrupole/Time-of-Flight Tandem mass spectrometer using electron spray ionization.

### Reaction Conditions Optimization: Different Ratios of *N*-oxides and Acid

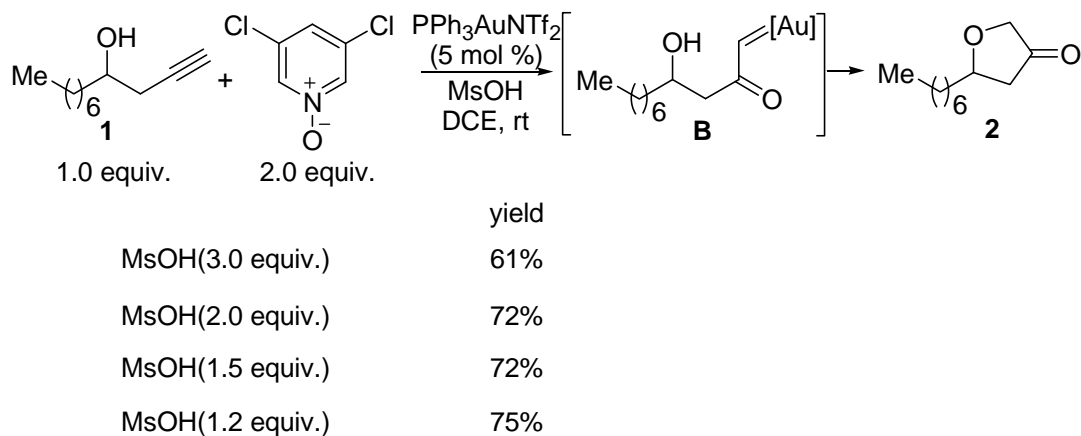

### General procedure for the preparation of propargylic alcohol 1 and 3

In a typical experiment a solution of Grignard reagent, C<sub>3</sub>H<sub>3</sub>MgBr in Et<sub>2</sub>O was prepared by a literature procedure.<sup>1</sup> This solution was cooled to -30 °C and a solution of the corresponding aldehyde or ketone in Et<sub>2</sub>O was added dropwise. The mixture was slowly warmed to room temperature and stirred for 1 h. It was then poured into ice water. Saturated aqueous NH<sub>4</sub>Cl solution was added to dissolve the precipitate and the organic

layer was separated. The aqueous layer was extracted with ether and the extracts were combined with the above organic layer. The combined solution was dried over  $\text{MgSO}_4$ . After evaporation of the solvent the residue was purified by flash silica gel column chromatography.

### Undec-1-yn-4-ol (1)

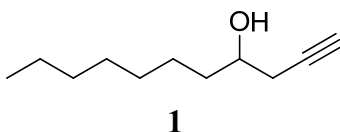

The title alcohol was prepared by reacting prop-2-yne-1-yl magnesium bromide with octanal in 97% yield. This compound is known and the spectroscopic data match those reported.<sup>2</sup>  $^1\text{H}$  NMR (400 MHz,  $\text{CDCl}_3$ )  $\delta$  3.80 – 3.72 (m, 1H), 2.47 – 2.28 (m, 1H), 2.06 (t, 1H,  $J = 2.4$  Hz), 1.89 (d, 1H,  $J = 4.4$  Hz), 1.58 – 1.51 (m, 2H), 1.47 – 1.27 (m, 10H), 0.88 (t, 3H,  $J = 6.8$  Hz);  $^{13}\text{C}$  NMR (125 MHz,  $\text{CDCl}_3$ )  $\delta$  80.9, 70.7, 69.9, 36.2, 31.8, 29.5, 29.2, 27.3, 25.6, 22.6, 14.1.

### 1-Benzyloxy-pent-4-yn-2-ol (3a)

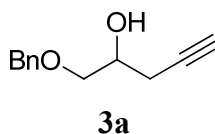

The title alcohol was prepared by reacting prop-2-yne-1-yl magnesium bromide with benzyloxy-acetaldehyde in 83% yield. This compound is known and the spectroscopic data match those reported.<sup>3</sup>  $^1\text{H}$  NMR (400 MHz,  $\text{CDCl}_3$ )  $\delta$  7.38 – 7.28 (m, 5H), 4.55 (s, 2H), 4.00 – 3.93 (m, 1H), 3.61 – 3.58 (m, 1H), 3.52 – 3.47 (m, 1H), 2.61 (d, 1H,  $J = 4.8$  Hz), 2.44 (dd, 2H,  $J = 6.0$  Hz,  $J = 3.2$  Hz), 2.02 – 2.01 (m, 1H);  $^{13}\text{C}$  NMR (125 MHz,  $\text{CDCl}_3$ )  $\delta$  137.7, 128.4, 127.8, 127.7, 80.2, 73.4, 72.7, 70.5, 68.7, 23.4.

### 8-Bromo-oct-1-yn-4-ol (3b)

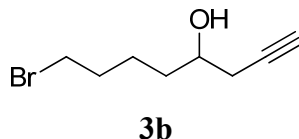

The title alcohol was prepared by reacting prop-2-yne-1-yl magnesium bromide with 5-bromo-pentanal in 45% yield.  $^1\text{H}$  NMR (400 MHz,  $\text{CDCl}_3$ )  $\delta$  3.77 – 3.74 (m, 1H), 3.40 (t, 2H,  $J = 6.4$  Hz), 2.45 – 2.28 (m, 2H), 2.05 (t, 1H,  $J = 2.4$  Hz), 1.96 (bs, 1H), 1.92 – 1.82 (m, 2H), 1.64 – 1.47 (m, 4H);  $^{13}\text{C}$  NMR (125 MHz,  $\text{CDCl}_3$ )  $\delta$  80.6, 71.0, 69.6, 35.2, 33.6, 32.5, 27.4, 24.2; IR (neat): 3386, 3295, 2931, 2864, 1425; MS ( $\text{ES}^+$ ) Calculated for  $[\text{C}_8\text{H}_{13}\text{BrNaO}]^+$ : 227.0; Found: 227.1.

### 1-Phenylhex-5-yn-3-ol (3c)

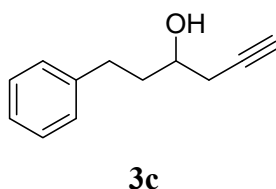

The title alcohol was prepared by reacting prop-2-yne-1-yl magnesium bromide with 3-phenyl-propionaldehyde in 77% yield. This compound is known and the spectroscopic data match those reported.<sup>4</sup>  $^1\text{H}$  NMR (400 MHz,  $\text{CDCl}_3$ )  $\delta$  7.30 – 7.18 (m, 5H), 3.82 – 3.75 (m, 1H), 2.84 – 2.65 (m, 2H), 2.50 – 2.35 (m, 2H), 2.05 (t, 1H,  $J = 2.4$  Hz), 2.01 – 1.93 (m, 1H), 1.88 – 1.83 (m, 2H);  $^{13}\text{C}$  NMR (125 MHz,  $\text{CDCl}_3$ )  $\delta$  141.6, 128.4, 128.3, 125.8, 80.6, 70.9, 69.0, 37.7, 31.8, 27.4.

### 8-Azidooct-1-yn-4-ol (3d)

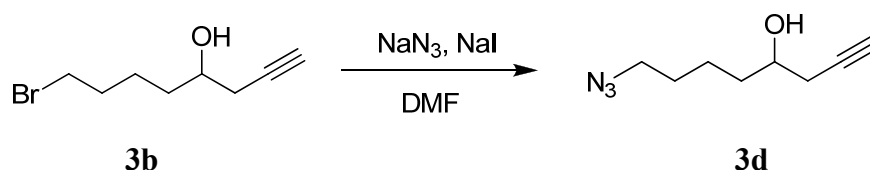

To a solution of **3b** (612 mg, 3.0 mmol) in DMF (10 mL) was added  $\text{NaN}_3$  (0.59 g, 9 mmol) and NaI (0.3 g, 1.5 mmol) at room temperature. The resulting mixture was heated at 80 °C for 12 h and cooled to room temperature before the addition of water (10 mL)

and diethyl ether (20 mL). The aqueous layer was extracted with Et<sub>2</sub>O (3 × 30 mL) and the combined organic layers were washed with water (2 × 10 mL), brine (10 mL), dried with MgSO<sub>4</sub>, and concentrated. The crude product was purified with flash silica gel column chromatography (eluent: hexanes : ethyl acetate = 5:1) to get **3d** (0.256 g, 1.5 mmol) in 50% yield. <sup>1</sup>H NMR (400 MHz, CDCl<sub>3</sub>) δ 3.80 – 3.74 (m, 1H), 3.29 (t, 2H, *J* = 6.4 Hz), 2.47 – 2.30 (m, 2H), 2.07 (t, 1H, *J* = 2.4 Hz), 1.94 (bs, 1H), 1.69 – 1.42 (m, 6H); <sup>13</sup>C NMR (125 MHz, CDCl<sub>3</sub>) δ 80.6, 71.0, 69.5, 51.3, 35.5, 28.7, 27.4, 22.8; IR (neat): 3395(bs), 3299, 2940, 2866, 2098, 1456, 1350, 1264; MS (ES<sup>+</sup>) Calculated for [C<sub>8</sub>H<sub>14</sub>N<sub>3</sub>O]<sup>+</sup>: 168.1; Found: 168.1.

### 7-Methoxymethoxyhept-1-yn-4-ol (**3e**)

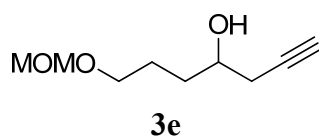

The title alcohol was prepared by reacting prop-2-yne-1-yl magnesium bromide with 4-methoxymethoxy-butyraldehyde in 55% yield. <sup>1</sup>H NMR (400 MHz, CDCl<sub>3</sub>) δ 4.58 (s, 2H), 3.78 – 3.73 (m, 1H), 3.53 (t, 2H, *J* = 6 Hz), 3.32 (s, 3H), 2.61 (bs, 1H), 2.41 – 2.28 (m, 2H), 2.02 (t, 1H, *J* = 2.4 Hz), 1.74 – 1.52 (m, 4H); <sup>13</sup>C NMR (125 MHz, CDCl<sub>3</sub>) δ 96.3, 80.9, 70.6, 69.6, 67.6, 55.2, 33.2, 27.3, 25.9; IR (neat): 3423, 3295, 2937, 1449; Calculated for [C<sub>9</sub>H<sub>16</sub>NaO<sub>3</sub>]<sup>+</sup>: 195.1; Found: 195.1.

### tert-Butyl *N*-(5-Hydroxyoct-7-ynyl)carbamate (**3f**)

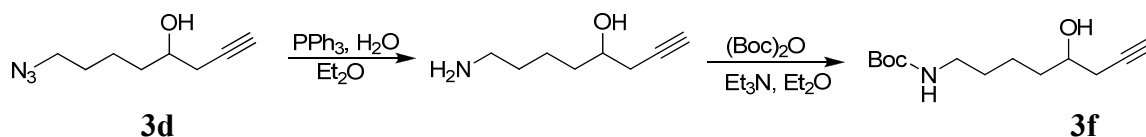

To a solution of **3d** (70.1 mg, 0.42 mmol) in Et<sub>2</sub>O (10 mL) was added PPh<sub>3</sub> (132 mg, 0.5 mmol) and H<sub>2</sub>O (0.3 mL) at room temperature. The resulting mixture was stirred for 12 h. The reaction mixture was then added (Boc)<sub>2</sub>O (0.685 g, 3.1 mmol) and stirred overnight. The reaction was added water and the aqueous layer was extracted with Et<sub>2</sub>O (3 × 20 mL)

and the combined organic layers were washed with brine (10 mL), dried with  $\text{MgSO}_4$ , and concentrated. The crude product was purified with flash silica gel column chromatography (eluent: hexanes : ethyl acetate = 3:1) to give **3f** (65 mg, 0.27 mmol) in 64% yield.  $^1\text{H}$  NMR (400 MHz,  $\text{CDCl}_3$ )  $\delta$  4.54 (bs, 1H), 3.79 – 3.73 (m, 1H), 3.12 (d, 2H,  $J = 5.6$  Hz), 2.45 – 2.29 (m, 2H), 2.06 (t, 1H,  $J = 2.4$  Hz), 2.02 (bs, 1H), 1.64 – 1.36 (m, 15H);  $^{13}\text{C}$  NMR (125 MHz,  $\text{CDCl}_3$ )  $\delta$  156.1, 80.8, 79.1, 70.7, 69.6, 40.2, 35.6, 29.9, 28.4, 27.4, 22.6; IR (neat): 3400(bs), 3311, 2977, 2936, 2865, 2119, 1689, 1526, 1366, 1251; MS ( $\text{ES}^+$ ) Calculated for  $[\text{C}_{13}\text{H}_{23}\text{NNaO}_3]^+$ : 185.1; Found: 185.1.

### 1-Cyclohexylbut-3-yn-1-ol (**3g**)

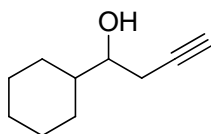

**3g**

The title alcohol was prepared by reacting prop-2-yne-1-yl magnesium bromide with cyclohexanecarbaldehyde in 80% yield. This compound is known and the spectroscopic data match those reported.<sup>5</sup>  $^1\text{H}$  NMR (400 MHz,  $\text{CDCl}_3$ )  $\delta$  3.51 – 3.47 (m, 1H), 2.48 – 2.43 (m, 1H), 2.40 – 2.31 (m, 1H), 2.06 – 2.04 (m, 1H), 1.92 – 1.86 (m, 2H), 1.78 – 1.64 (m, 4H), 1.50 – 1.42 (m, 1H), 1.30 – 0.98 (m, 5H);  $^{13}\text{C}$  NMR (125 MHz,  $\text{CDCl}_3$ )  $\delta$  81.3, 73.9, 70.6, 42.4, 28.9, 28.1, 26.3, 26.1, 25.9, 24.6.

### 1-Phenylbut-3-yn-1-ol (**3h**)

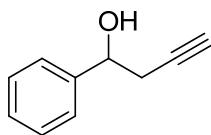

**3h**

The title alcohol was prepared by reacting prop-2-yne-1-yl magnesium bromide with benzaldehyde in 85% yield. This compound is known and the spectroscopic data match those reported.<sup>6</sup>  $^1\text{H}$  NMR (400 MHz,  $\text{CDCl}_3$ )  $\delta$  7.41 – 7.31 (m, 5H), 4.87 (t, 1H,  $J = 6.0$

Hz), 2.65 (t, 2H,  $J = 2.8$  Hz), 2.47 (bs, 1H), 2.08 (t, 1H,  $J = 2.4$  Hz);  $^{13}\text{C}$  NMR (125 MHz,  $\text{CDCl}_3$ )  $\delta$  142.4, 128.4, 128.0, 125.7, 80.6, 72.3, 70.9, 29.4.

### 1-(4-Methoxyphenyl)but-3-yn-1-ol (3i)

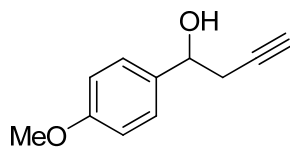

**3i**

The title alcohol was prepared by reacting prop-2-yne-1-yl magnesium bromide with 4-methoxy-benzaldehyde in 78% yield. This compound is known and the spectroscopic data match those reported.<sup>6</sup>  $^1\text{H}$  NMR (400 MHz,  $\text{CDCl}_3$ )  $\delta$  7.31 (d, 2H,  $J = 8.0$  Hz), 6.90 (d, 2H,  $J = 8.0$  Hz), 4.84 – 4.80 (m, 1H), 3.80 (s, 3H), 2.63 – 2.61 (m, 2H), 2.41 (d, 1H,  $J = 3.2$  Hz), 2.06 (t, 1H,  $J = 2.4$  Hz);  $^{13}\text{C}$  NMR (125 MHz,  $\text{CDCl}_3$ )  $\delta$  159.3, 134.6, 127.0, 113.8, 80.8, 71.9, 70.8, 55.2, 29.3.

### 1-(4-Bromophenyl)but-3-yn-1-ol (3j)

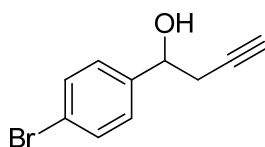

**3j**

The title alcohol was prepared by reacting prop-2-yne-1-yl magnesium bromide with 4-bromo-benzaldehyde in 72% yield. This compound is known and the spectroscopic data match those reported.<sup>6</sup>  $^1\text{H}$  NMR (400 MHz,  $\text{CDCl}_3$ )  $\delta$  7.48 (d, 2H,  $J = 8.4$  Hz), 7.26 (d, 2H,  $J = 8.4$  Hz), 4.83 (t, 1H,  $J = 6.0$  Hz), 2.62 – 2.59 (m, 2H), 2.50 (bs, 1H), 2.08 (t, 1H,  $J = 2.4$  Hz);  $^{13}\text{C}$  NMR (125 MHz,  $\text{CDCl}_3$ )  $\delta$  141.3, 131.5, 127.5, 121.8, 80.1, 71.6, 71.3, 29.4.

### 1-(2-Bromophenyl)but-3-yn-1-ol (3k)

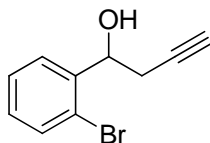**3k**

The title alcohol was prepared by reacting prop-2-yne-1-yl magnesium bromide with 2-bromo-benzaldehyde in 75% yield. This compound is known and the spectroscopic data match those reported.<sup>6</sup> <sup>1</sup>H NMR (400 MHz, CDCl<sub>3</sub>) δ 7.63 – 7.59 (m, 1H), 7.54 – 7.50 (m, 1H), 7.38 – 7.34 (m, 1H), 7.18 – 7.14 (m, 1H), 5.25 – 5.21 (m, 1H), 2.84 – 2.79 (m, 1H), 2.58 – 2.50 (m, 2H), 2.11 (t, 1H, *J* = 2.4 Hz); <sup>13</sup>C NMR (125 MHz, CDCl<sub>3</sub>) δ 141.2, 132.6, 129.2, 127.7, 127.3, 121.7, 80.2, 71.2, 70.9, 27.7.

### Methyl 4-(1-hydroxybut-3-ynyl)benzoate (3l)

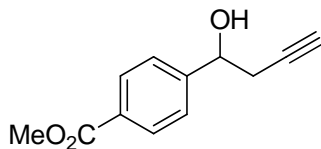**3l**

The title alcohol was prepared by reacting prop-2-yne-1-yl magnesium bromide with 4-formyl-benzoic acid methyl ester in 65% yield. <sup>1</sup>H NMR (400 MHz, CDCl<sub>3</sub>) δ 8.02 (d, 2H, *J* = 6.8 Hz), 7.47 (d, 2H, *J* = 6.8 Hz), 4.95 – 4.92 (m, 1H), 3.91 (s, 3H), 2.69 – 2.55 (m, 3H), 2.08 (t, 1H, *J* = 2.4 Hz); <sup>13</sup>C NMR (125 MHz, CDCl<sub>3</sub>) δ 166.8, 147.4, 129.8, 129.7, 125.7, 80.0, 71.8, 71.4, 52.1, 29.4; IR (neat): 3432, 3294, 2952, 1716, 1611, 1435; Calculated for [C<sub>12</sub>H<sub>12</sub>NaO<sub>3</sub>]<sup>+</sup>: 227.1; Found: 227.1.

### (1-Furan-2-yl)but-3-yn-1-ol (3m)

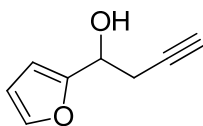**3m**



The title alcohol was prepared by reacting prop-2-yne-1-yl magnesium bromide with furan-2-carbaldehyde in 71% yield. This compound is known and the spectroscopic data match those reported.<sup>6</sup> <sup>1</sup>H NMR (400 MHz, CDCl<sub>3</sub>) δ 7.39 (t, 1H, *J* = 1.2 Hz), 6.35 (d, 2H, *J* = 1.2 Hz), 4.88 (dd, 1H, *J* = 12.0 Hz, *J* = 2.0 Hz), 2.78 (dd, 2H, *J* = 6.4 Hz, *J* = 2.8 Hz), 2.45 – 2.43 (m, 1H), 2.07 (t, 1H, *J* = 2.4 Hz); <sup>13</sup>C NMR (125 MHz, CDCl<sub>3</sub>) δ 154.6, 142.3, 110.2, 106.6, 79.8, 71.1, 66.0, 26.0.

### 1-[1-(Toluene-4-sulfonyl)-1H-indol-3-yl]but-3-yn-1-ol (3n)

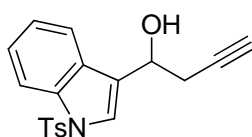

**3n**

The title alcohol was prepared by reacting prop-2-yne-1-yl magnesium bromide with 1-(toluene-4-sulfonyl)-1H-indole-3-carbaldehyde in 70% yield. <sup>1</sup>H NMR (400 MHz, CDCl<sub>3</sub>) δ 7.98 (d, 1H, *J* = 8.0 Hz), 7.76 (d, 2H, *J* = 8.0 Hz), 7.62 (d, 2H, *J* = 8.4 Hz), 7.34 – 7.30 (m, 1H), 7.25 – 7.18 (m, 3H), 5.10 (dd, 1H, *J* = 10.4 Hz, *J* = 4.8 Hz), 2.85 – 2.73 (m, 2H), 2.58 – 2.31 (m, 1H), 2.10 (t, 1H, *J* = 2.4 Hz); <sup>13</sup>C NMR (125 MHz, CDCl<sub>3</sub>) δ 145.0, 135.3, 135.0, 129.8, 128.6, 126.8, 124.9, 123.6, 123.2, 123.1, 120.1, 113.7, 80.2, 71.5, 66.1, 27.6, 21.5; IR (neat): 3532, 3294, 2918, 1596, 1448, 1368, 1174; MS (ES<sup>+</sup>) Calculated for [C<sub>19</sub>H<sub>17</sub>NNaO<sub>3</sub>S]<sup>+</sup>: 362.1; Found: 362.1.

### 2-Phenylpent-4-yn-2-ol (3o)

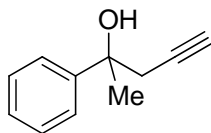

**3o**

The title alcohol was prepared by reacting prop-2-yne-1-yl magnesium bromide with 1-phenyl-ethanone in 65% yield. This compound is known and the spectroscopic data match those reported.<sup>6</sup> <sup>1</sup>H NMR (400 MHz, CDCl<sub>3</sub>) δ 7.41 (d, 2H, *J* = 7.6 Hz), 7.29 (t,

2H,  $J = 8.0$  Hz), 7.20 (t, 1H,  $J = 7.6$  Hz), 2.66 (dq, 2H,  $J = 16.0$  Hz,  $J = 2.4$  Hz), 2.35 (s, 1H), 1.99 – 1.97 (m, 1H), 1.57 (s, 3H);  $^{13}\text{C}$  NMR (125 MHz,  $\text{CDCl}_3$ )  $\delta$  146.3, 128.3, 128.2(1), 128.1(9), 127.1, 124.7, 80.4, 73.2, 71.7, 34.6, 29.2.

### 2-Ethynylhexan-1-ol (**3p**)

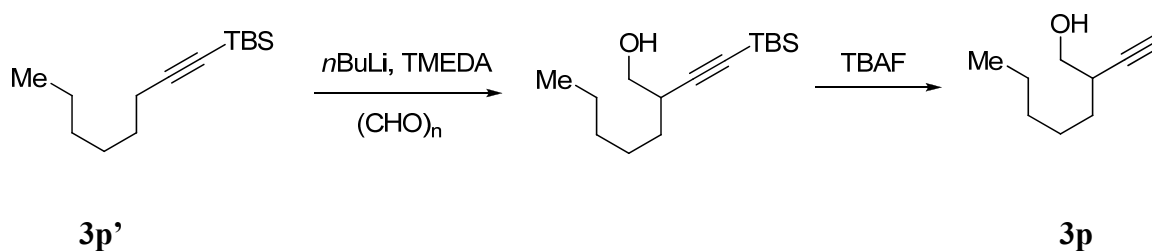

To a solution of **3p'** (750 mg, 6.8 mmol) and TMEDA (8.2 mmol, 1.2 eq) in anhydrous THF (10 mL) cooled to  $-78$  °C was added  $n\text{-BuLi}$  (5.1 mL, 1.6 M in hexanes, 8.2 mmol, 1.2 eq). The resulting mixture was warmed to  $0$  °C during a 1 h period and cooled in dry ice-acetone bath again before the addition of an aldehyde (1.1 eq). After stirred at  $-78$  °C for 1 h, the reaction mixture was quenched with aq.  $\text{NH}_4\text{Cl}$ , and extracted with  $\text{Et}_2\text{O}$ . The combined organic layers were washed with brine, dried with  $\text{MgSO}_4$ , and concentrated. The residue was dissolved in THF (10 mL), and the resulting solution was treated with TBAF (8.2 mL, 1.0 M in THF, 1.2 eq) at  $40$  °C for 1 h. The reaction mixture was quenched with aq.  $\text{NH}_4\text{Cl}$ , and extracted with  $\text{Et}_2\text{O}$ . The combine organic layer was washed with brine, dried with  $\text{MgSO}_4$ , and concentrated. The alkynyl alcohol product was purified with flash silica gel column chromatography to get **3p** in 25% yield.  $^1\text{H}$  NMR (500 MHz,  $\text{CDCl}_3$ )  $\delta$  3.67 – 3.55 (m, 2H), 2.60 – 2.55 (m, 1H), 2.14 (d, 1H,  $J = 2.5$  Hz), 1.76 (t, 1H,  $J = 6.5$  Hz), 1.53 – 1.25 (m, 8H), 0.89 (t, 3H,  $J = 7.0$  Hz);  $^{13}\text{C}$  NMR (125 MHz,  $\text{CDCl}_3$ )  $\delta$  85.1, 70.9, 65.4, 35.2, 31.6, 30.8, 26.8, 22.5, 14.0; IR (neat): 3311, 2929, 2860, 1590, 1467; Calculated for  $[\text{C}_9\text{H}_{16}\text{NaO}]^+$ : 163.1; Found: 163.1.

### (1S\*, 2S\*)- 2-Ethynylcyclohexanol (**3q**)

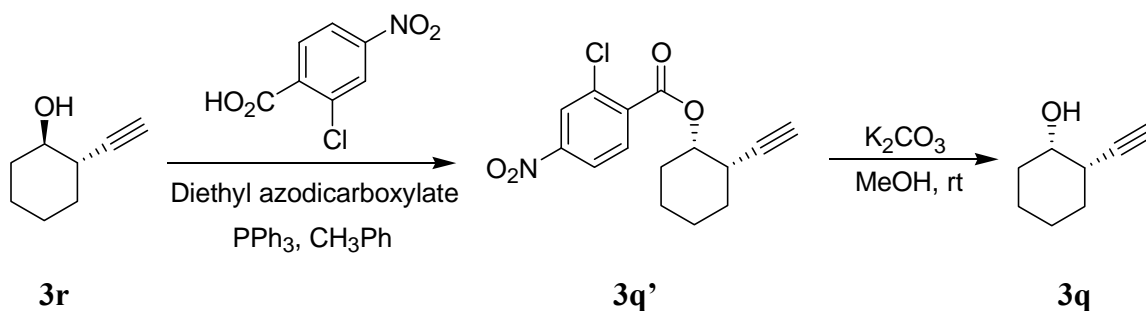

2-Chloro-4-nitro-benzoic acid (202 mg, 1.0 mmol) and  $\text{Ph}_3\text{P}$  (262 mg, 1.0 mmol) were added to a solution of **3r** (62 mg, 0.5 mmol) in toluene (5 mL) at 0 °C under  $\text{N}_2$ . Diethyl azodicarboxylate (toluene solu., 1.0 mmol) was added dropwise to the resulting solution. The mixture was stirred for 10 h and then treated with saturated aqueous  $\text{NaHCO}_3$ . The resulting solution was extracted with AcOEt. The organic layer was washed with brine, dried over  $\text{Na}_2\text{SO}_4$ , and evaporated in vacuo. The residue was purified by  $\text{SiO}_2$  column chromatography using hexane-AcOEt (25/1) as the eluent to give **3q'** (138 mg, 90%). **3q'** (138 mg, 0.45 mmol) was dissolved in MeOH (10 mL), and the resulting solution was treated with  $\text{K}_2\text{CO}_3$  (249 mg, 1.8 mmol) at rt for 1 h. The reaction mixture was concentrated and purified with flash silica gel column chromatography to get **3q** in 83% yield. This compound is known and the spectroscopic data match those reported.<sup>7</sup>  $^1\text{H}$  NMR (400 MHz,  $\text{CDCl}_3$ )  $\delta$  3.71 – 3.67 (m, 1H), 2.85 – 2.81 (m, 1H), 2.16 (d, 1H,  $J = 2.4$  Hz), 1.89 – 1.82 (m, 2H), 1.74 – 1.64 (m, 3H), 1.62 – 1.50 (m, 2H), 1.42 – 1.36 (m, 1H), 1.35 – 1.26 (m, 1H);  $^{13}\text{C}$  NMR (125 MHz,  $\text{CDCl}_3$ )  $\delta$  84.3, 71.7, 69.6, 35.5, 31.2, 28.6, 22.6, 22.0.

#### (1*R*\*, 2*S*\*)-2-Ethynyl-cyclohexanol (**3r**)

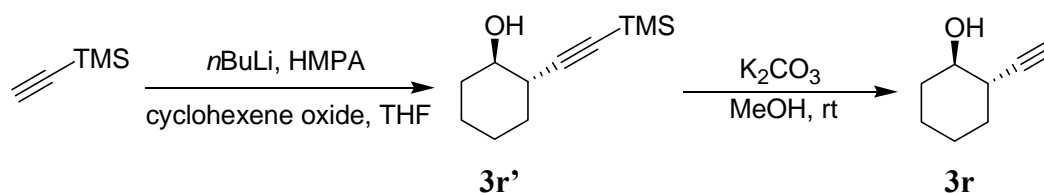

$n\text{-BuLi}$  (1.6 M, 11.0 mL, 17.4 mmol) was added dropwise at 0 °C to a solution of triethylsilylacetylene (2.3 mL, 15.8 mmol) in THF (20 mL) and HMPA (7.5 mL). The mixture was stirred for 30 min. then cyclohexene oxide (1.7 mL, 15.8 mmol) added and

stirring continued for 12 h. Aqueous  $\text{NH}_4\text{Cl}$  (10 mL) was added, and the mixture then extracted with  $\text{Et}_2\text{O}$  (3 x 20 mL), the combined extracts washed with brine (20 mL), dried ( $\text{MgSO}_4$ ) and then condensed in vacuo. Column chromatography (hexanes: EtOAc, 5:1) gave 2-trimethylsilanylethynyl-cyclohexanol **3r'** (2.38 g, 77%) as a colorless oil. **3r'** (1.49 g, 7.6 mmol) was dissolved in MeOH (15 mL), and the resulting solution was treated with  $\text{K}_2\text{CO}_3$  (1.60 g, 11.6 mmol) at rt for 6 h. The reaction mixture was concentrated and purified with flash silica gel column chromatography to get **3r** in 85% yield. This compound is known and the spectroscopic data match those reported.<sup>8</sup>  $^1\text{H}$  NMR (400 MHz,  $\text{CDCl}_3$ )  $\delta$  3.48 – 3.42 (m, 1H), 2.28 (s, 1H), 2.23 – 2.15 (m, 1H), 2.14 (d, 1H,  $J = 2.4$  Hz), 2.03 – 1.95 (m, 2H), 1.77 – 1.71 (m, 1H), 1.672 – 1.61 (m, 1H), 1.43 – 1.11 (m, 4H);  $^{13}\text{C}$  NMR (125 MHz,  $\text{CDCl}_3$ )  $\delta$  85.8, 73.4, 70.2, 38.6, 33.1, 30.8, 24.7, 24.1.

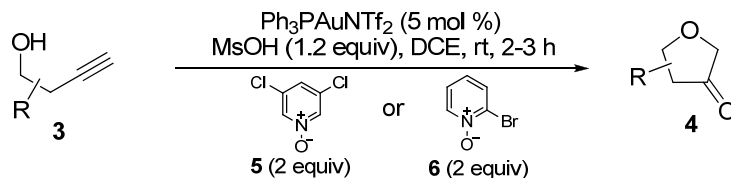

**Gold catalysis: general procedure:** Pyridine *N*-oxide **5** or **6** (0.60 mmol), MsOH (1.8 mL, 0.20 M in DCE), and  $\text{Au}(\text{PPh}_3)\text{NTf}_2$  (11.1 mg, 0.015 mmol) were added in this order to a solution of the propargyl alcohol **1** or **3** (0.30 mmol) in DCE (4.2 mL) at room temperature under  $\text{N}_2$ . The reaction mixture was stirred at rt and the progress of the reaction was monitored by TLC. The reaction typically took 2 – 3 h. Upon completion, the mixture was concentrated and the residue was purified by chromatography on silica gel (eluent: hexanes/ethyl acetate) to afford the desired products **2** or **4**.

### 5-Heptyldihydrofuran-3-one (**2**)

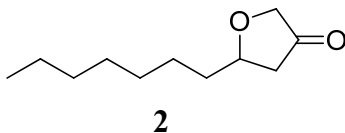

Compound **2** was prepared in 73% yield using **5** as oxidant according to the general procedure, and its spectroscopic data match well with those reported.<sup>9</sup> The reaction time was 2.5 h. <sup>1</sup>H NMR (400 MHz, CDCl<sub>3</sub>) δ 4.24 – 4.17 (m, 1H), 4.03 (d, 1H, *J* = 16.8 Hz), 3.81 (d, 1H, *J* = 16.8 Hz), 2.51 (dd, 1H, *J* = 18.0 Hz, *J* = 6.0 Hz), 2.14 (dd, 1H, *J* = 18.0 Hz, *J* = 9.6 Hz), 1.80 – 1.70 (m, 1H), 1.66 – 1.57 (m, 1H), 1.46 – 1.23 (m, 10H), 0.86 (t, 3H, *J* = 7.2 Hz); <sup>13</sup>C NMR (125 MHz, CDCl<sub>3</sub>) δ 215.3, 78.3, 71.3, 43.0, 35.3, 31.7, 29.4, 29.1, 25.4, 22.6, 14.0; IR (neat): 2928, 2857, 1763, 1466, 1384.

#### 5-Benzyloxymethyldihydrofuran-3-one (**4a**)

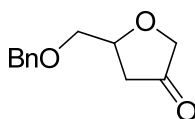

**4a**

Compound **4a** was prepared in 68% yield using **5** as oxidant according to the general procedure. The reaction time was 3 h. <sup>1</sup>H NMR (400 MHz, CDCl<sub>3</sub>) δ 7.37 – 7.29 (m, 5H), 4.59 (dd, 2H, *J* = 18.0 Hz, *J* = 12.0 Hz), 4.54 – 4.49 (m, 1H), 4.12 (d, 1H, *J* = 16.4 Hz), 3.91 (d, 1H, *J* = 16.8 Hz), 3.74 (dd, 1H, *J* = 10.4 Hz, *J* = 3.2 Hz), 3.60 (dd, 1H, *J* = 10.4 Hz, *J* = 4.8 Hz), 2.56 – 2.42 (m, 2H); <sup>13</sup>C NMR (125 MHz, CDCl<sub>3</sub>) δ 214.3, 137.7, 128.4, 127.8, 127.6, 76.7, 73.5, 72.0, 71.4, 38.9; IR (neat): 3087, 3030, 2903, 2864, 1759, 1453, 1361; MS (ES<sup>+</sup>) Calculated for [C<sub>12</sub>H<sub>14</sub>NaO<sub>3</sub>]<sup>+</sup>: 229.1; Found: 229.1.

#### 5-(4-Bromobutyl)dihydrofuran-3-one (**4b**)

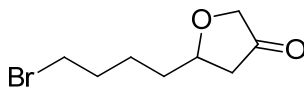

**4b**

Compound **4b** was prepared in 80% yield using **5** as oxidant according to the general procedure. The reaction time was 3 h. <sup>1</sup>H NMR (400 MHz, CDCl<sub>3</sub>) δ 4.27 – 4.20 (m, 1H), 4.06 (d, 1H, *J* = 17.2 Hz), 3.96 (d, 2H, *J* = 12.8 Hz), 3.43 (t, 2H, *J* = 5.6 Hz), 2.56 (dd, 1H, *J* = 17.6 Hz, *J* = 4.8 Hz), 2.17 (dd, 1H, *J* = 17.6 Hz, *J* = 4.8 Hz), 1.96 – 1.89 (m,

2H), 1.79 – 1.56 (m, 3H), 1.57 – 1.49 (m, 1H);  $^{13}\text{C}$  NMR (125 MHz,  $\text{CDCl}_3$ )  $\delta$  214.9, 78.0, 71.4, 42.9, 34.4, 33.4, 32.4, 24.1; IR (neat): 2938, 2865, 1759; Calculated for  $[\text{C}_8\text{H}_{13}\text{BrNaO}_2]^+$ : 243.0; Found: 243.0.

#### 5-Phenethyldihydrofuran-3-one (4c)

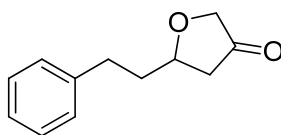

**4c**

Compound **4c** was prepared in 68% yield using **5** as oxidant according to the general procedure. The reaction time was 3 h.  $^1\text{H}$  NMR (400 MHz,  $\text{CDCl}_3$ )  $\delta$  7.25 – 7.12 (m, 5H), 4.18 – 4.13 (m, 1H), 4.00 (d, 1H,  $J = 16.8$  Hz), 3.78 (d, 1H,  $J = 17.2$  Hz), 2.77 – 2.66 (m, 2H), 2.45 (dd, 1H,  $J = 17.6$  Hz,  $J = 6.0$  Hz), 2.11 (dd, 1H,  $J = 17.6$  Hz,  $J = 9.2$  Hz), 2.07 – 1.89 (m, 2H);  $^{13}\text{C}$  NMR (125 MHz,  $\text{CDCl}_3$ )  $\delta$  215.0, 141.1, 128.5, 128.4, 126.1, 77.4, 71.3, 42.9, 37.0, 31.6; IR (neat): 3085, 3026, 2917, 2862, 1759, 1495, 1386; MS ( $\text{ES}^+$ ) Calculated for  $[\text{C}_{12}\text{H}_{14}\text{NaO}_2]^+$ : 213.1; Found: 213.1.

#### 5-(4-Azidobutyl)dihydrofuran-3-one (4d)

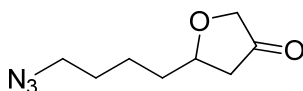

**4d**

Compound **4d** was prepared in 82% yield using **5** as oxidant according to the general procedure. The reaction time was 3 h.  $^1\text{H}$  NMR (400 MHz,  $\text{CDCl}_3$ )  $\delta$  4.26 – 4.21 (m, 1H), 4.05 (d, 1H,  $J = 13.6$  Hz), 3.84 (d, 1H,  $J = 13.6$  Hz), 3.31 (t, 2H,  $J = 5.6$  Hz), 2.55 (dd, 1H,  $J = 14.4$  Hz,  $J = 4.8$  Hz), 2.17 (dd, 1H,  $J = 14.4$  Hz,  $J = 7.6$  Hz), 1.80 – 1.47 (m, 6H);  $^{13}\text{C}$  NMR (125 MHz,  $\text{CDCl}_3$ )  $\delta$  214.9, 78.0, 71.4, 51.3, 42.9, 34.8, 28.7, 22.7; IR (neat): 2937, 2864, 2094, 1759, 1507, 1456; MS ( $\text{ES}^+$ ) Calculated for  $[\text{C}_8\text{H}_{13}\text{N}_3\text{NaO}_2]^+$ : 168.1; Found: 168.1.

**5-(3-Methoxymethoxypropyl)dihydrofuran-3-one (4e)**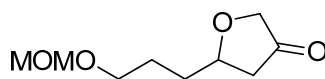**4e**

Compound **4e** was prepared in 62% yield using **5** as oxidant according to the general procedure. The reaction time was 3 h.  $^1\text{H}$  NMR (400 MHz,  $\text{CDCl}_3$ )  $\delta$  4.60 (s, 2H), 4.28 – 4.21 (m, 1H), 4.05 (d, 1H,  $J = 16.8$  Hz), 3.83 (d, 1H,  $J = 17.2$  Hz), 3.58 – 3.51 (m, 2H), 3.34 (s, 3H), 2.53 (dd, 1H,  $J = 18$  Hz,  $J = 6$  Hz), 2.16 (dd, 1H,  $J = 18$  Hz,  $J = 6$  Hz), 1.84 – 1.62 (m, 4H);  $^{13}\text{C}$  NMR (125 MHz,  $\text{CDCl}_3$ )  $\delta$  215.1, 96.4, 78.0, 71.4, 67.3, 55.2, 43.0, 32.1, 25.7; IR (neat): 2950, 2883, 2253, 1761; Calculated for  $[\text{C}_9\text{H}_{16}\text{NaO}_4]^+$ : 211.1; Found: 211.1.

**tert-Butyl N-[4-(4-Oxotetrahydrofuran-2-yl)butyl]carbamate (4f)**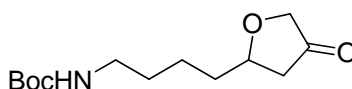**4f**

Compound **4f** was prepared in 64% yield using **5** as oxidant according to the general procedure. The reaction time was 3 h.  $^1\text{H}$  NMR (400 MHz,  $\text{CDCl}_3$ )  $\delta$  4.54 (bs, 1H), 4.27 – 4.20 (m, 1H), 4.05 (d, 1H,  $J = 17.2$  Hz), 3.83 (d, 1H,  $J = 16.8$  Hz), 3.14 (dd, 1H,  $J = 12.8$  Hz,  $J = 6.8$  Hz), 2.53 (dd, 1H,  $J = 18.0$  Hz,  $J = 6.0$  Hz), 2.16 (dd, 1H,  $J = 18.0$  Hz,  $J = 9.2$  Hz), 1.80 – 1.37 (m, 15H);  $^{13}\text{C}$  NMR (125 MHz,  $\text{CDCl}_3$ )  $\delta$  215.1, 156.0, 79.1, 78.1, 71.3, 42.9, 40.3, 34.9, 30.0, 28.4, 22.7; IR (neat): 3361, 2977, 2934, 2865, 1760, 1698, 1519, 1365; MS ( $\text{ES}^+$ ) Calculated for  $[\text{C}_{13}\text{H}_{23}\text{NNaO}_4]^+$ : 280.2; Found: 280.1.

**5-Cyclohexyldihydrofuran-3-one (4g)**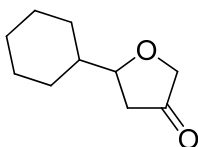**4g**

Compound **4g** was prepared in 72% yield using **5** as oxidant according to the general procedure, and its spectroscopic data match well with those reported.<sup>10</sup> The reaction time was 2 h. <sup>1</sup>H NMR (400 MHz, CDCl<sub>3</sub>) δ 4.04 (d, 1H, *J* = 16.8 Hz), 3.97 – 3.91 (m, 1H), 3.82 (d, 1H, *J* = 16.8 Hz), 2.46 (dd, 1H, *J* = 18.0 Hz, *J* = 6.0 Hz), 2.23 (dd, 1H, *J* = 17.6 Hz, *J* = 10.0 Hz), 2.00 (d, 1H, *J* = 12.8 Hz), 1.80 – 1.52 (m, 5H), 1.30 – 1.15 (m, 3H), 1.08 – 0.97 (m, 2H); <sup>13</sup>C NMR (125 MHz, CDCl<sub>3</sub>) δ 215.5, 82.7, 71.5, 42.8, 41.0, 29.0, 28.7, 26.4, 25.8, 25.6; IR (neat): 2926, 2853, 1761, 1449; MS (ES<sup>+</sup>) Calculated for [C<sub>10</sub>H<sub>16</sub>NaO<sub>2</sub>]<sup>+</sup>: 191.1; Found: 191.1.

### 5-Phenyldihydrofuran-3-one (**4h**)

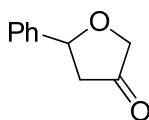

**4h**

Compound **4h** was prepared in 63% yield using **6** as oxidant according to the general procedure, and its spectroscopic data match well with those reported.<sup>11</sup> The reaction time was 2 h. <sup>1</sup>H NMR (400 MHz, CDCl<sub>3</sub>) δ 7.41 – 7.33 (m, 5H), 5.29 (dd, 1H, *J* = 9.6 Hz, *J* = 6.8 Hz), 4.25 (d, 1H, *J* = 16.8 Hz), 4.01 (d, 1H, *J* = 17.2 Hz), 2.86 (dd, 1H, *J* = 18.0 Hz, *J* = 6.0 Hz), 2.55 (dd, 1H, *J* = 18.0 Hz, *J* = 9.6 Hz); <sup>13</sup>C NMR (125 MHz, CDCl<sub>3</sub>) δ 214.2, 139.9, 128.7, 128.3, 125.8, 79.3, 71.7, 44.7; IR (neat): 3087, 3063, 3033, 2959, 2915, 2879, 2829, 1759, 1495, 1372; MS (ES<sup>+</sup>) Calculated for [C<sub>10</sub>H<sub>10</sub>NaO<sub>2</sub>]<sup>+</sup>: 185.1; Found: 185.1.

### 5-(4-Methoxyphenyl)dihydro-furan-3-one (**4i**)

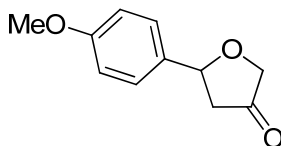

**4i**



Compound **4i** was prepared in 75% yield using **6** as oxidant according to the general procedure. The reaction time was 3 h.  $^1\text{H}$  NMR (400 MHz,  $\text{CDCl}_3$ )  $\delta$  7.33 (d, 2H,  $J = 8.0$  Hz), 6.92 (d, 2H,  $J = 8.8$  Hz), 5.22 (dd, 1H,  $J = 9.6$  Hz,  $J = 6.4$  Hz), 4.22 (d, 1H,  $J = 17.2$  Hz), 3.98 (d, 1H,  $J = 17.2$  Hz), 3.82 (s, 3H), 2.81 (dd, 1H,  $J = 17.6$  Hz,  $J = 6.0$  Hz), 2.55 (dd, 1H,  $J = 18.0$  Hz,  $J = 9.6$  Hz);  $^{13}\text{C}$  NMR (125 MHz,  $\text{CDCl}_3$ )  $\delta$  214.5, 159.6, 131.8, 127.3, 114.1, 79.1, 71.7, 55.3, 44.6; IR (neat): 3040, 3006, 2960, 2883, 2838, 1759, 1516, 1464, 1304; MS ( $\text{ES}^+$ ) Calculated for  $[\text{C}_{11}\text{H}_{12}\text{NaO}_3]^+$ : 215.1; Found: 215.1.

#### 5-(4-Bromophenyl)dihydrofuran-3-one (**4j**)

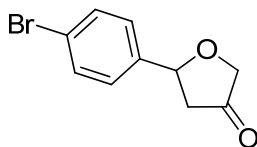

**4j**

Compound **4j** was prepared in 66% yield using **6** as oxidant according to the general procedure. The reaction time was 2 h.  $^1\text{H}$  NMR (400 MHz,  $\text{CDCl}_3$ )  $\delta$  7.49 (d, 2H,  $J = 8.4$  Hz), 7.24 (d, 2H,  $J = 8.8$  Hz), 5.20 (dd, 1H,  $J = 9.2$  Hz,  $J = 6.4$  Hz), 4.20 (d, 1H,  $J = 16.8$  Hz), 3.97 (d, 1H,  $J = 17.2$  Hz), 2.82 (dd, 1H,  $J = 18.0$  Hz,  $J = 6.4$  Hz), 2.44 (dd, 1H,  $J = 18.0$  Hz,  $J = 9.6$  Hz);  $^{13}\text{C}$  NMR (125 MHz,  $\text{CDCl}_3$ )  $\delta$  213.5, 139.0, 131.8, 127.5, 122.1, 78.6, 71.7, 44.6; IR (neat): 3052, 2960, 2880, 2829, 1760, 1490, 1364; Calculated for  $[\text{C}_{10}\text{H}_9\text{BrNaO}_2]^+$ : 263.0; Found: 263.0.

#### 5-(2-Bromophenyl)dihydrofuran-3-one (**4k**)

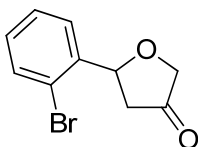

**4k**

Compound **4k** was prepared in 65% yield using **6** as oxidant according to the general procedure. The reaction time was 3 h.  $^1\text{H}$  NMR (400 MHz,  $\text{CDCl}_3$ )  $\delta$  7.63 (dd, 1H,  $J = 8.0$  Hz,  $J = 2.0$  Hz), 7.56 (dd, 1H,  $J = 8.0$  Hz,  $J = 1.2$  Hz), 7.40 – 7.36 (m, 1H), 7.22 –

7.17 (m, 1H), 5.52 (dd, 1H,  $J = 9.2$  Hz,  $J = 6.4$  Hz), 4.32 (d, 1H,  $J = 17.2$  Hz), 4.07 (d, 1H,  $J = 17.2$  Hz), 3.13 (dd, 1H,  $J = 18.4$  Hz,  $J = 6.4$  Hz), 2.31 (dd, 1H,  $J = 18.0$  Hz,  $J = 9.6$  Hz);  $^{13}\text{C}$  NMR (125 MHz,  $\text{CDCl}_3$ )  $\delta$  213.6, 140.0, 132.7, 129.4, 127.9, 126.4, 121.4, 78.5, 71.8, 43.7; IR (neat): 3067, 2915, 2883, 2831, 1761, 1472, 1439, 1363; Calculated for  $[\text{C}_{10}\text{H}_9\text{BrNaO}_2]^+$ : 263.0; Found: 263.0.

#### Methyl 4-(4-oxotetrahydrofuran-2-yl)benzoate (**4l**)

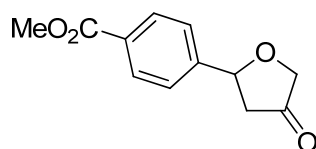

**4l**

Compound **4l** was prepared in 55% yield using **6** as oxidant according to the general procedure. The reaction time was 2 h.  $^1\text{H}$  NMR (400 MHz,  $\text{CDCl}_3$ )  $\delta$  8.00 (d, 2H,  $J = 8.4$  Hz), 7.42 (d, 2H,  $J = 8.4$  Hz), 5.28 (dd, 1H,  $J = 6.4$  Hz,  $J = 9.6$  Hz), 4.19 (d, 1H,  $J = 17.2$  Hz), 3.96 (d, 1H,  $J = 12.8$  Hz), 3.86 (s, 3H), 2.83 (dd, 1H,  $J = 18$  Hz,  $J = 6.4$  Hz), 2.44 (dd, 1H,  $J = 18$  Hz,  $J = 9.6$  Hz);  $^{13}\text{C}$  NMR (125 MHz,  $\text{CDCl}_3$ )  $\delta$  213.3, 166.6, 145.1, 130.0, 125.6, 78.8, 71.7, 52.2, 44.6; IR (neat): 2954, 2884, 1761, 1719, 1612, 1435; Calculated for  $[\text{C}_{12}\text{H}_{12}\text{NaO}_4]^+$ : 243.1; Found: 243.1.

#### 2,3-Dihydro[2,2']bifuranyl-4-one (**4m**)

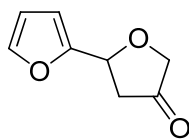

**4m**

Compound **4m** was prepared in 76% yield using **6** as oxidant according to the general procedure. The reaction time was 3 h.  $^1\text{H}$  NMR (400 MHz,  $\text{CDCl}_3$ )  $\delta$  7.44 – 7.43 (m, 1H), 6.38 – 6.36 (m, 2H), 5.36 (t, 1H,  $J = 7.2$  Hz), 4.12 (d, 1H,  $J = 17.2$  Hz), 3.98 (d, 1H,  $J = 17.2$  Hz), 2.82 – 2.76 (m, 2H);  $^{13}\text{C}$  NMR (125 MHz,  $\text{CDCl}_3$ )  $\delta$  213.5, 152.1, 143.2, 110.4, 108.6, 72.2, 70.4, 40.7; IR (neat): 3120, 2925, 2884, 2834, 1760, 1504, 1435, 1403, 1352; Calculated for  $[\text{C}_8\text{H}_8\text{NaO}_3]^+$ : 175.0; Found: 175.0.

**5-[1-(Toluene-4-sulfonyl)-1H-indol-3-yl]dihydrofuran-3-one (4n)**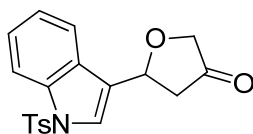**4n**

Compound **4n** was prepared in 68% yield using **6** as oxidant according to the general procedure. The reaction time was 2.5 h.  $^1\text{H}$  NMR (400 MHz,  $\text{CDCl}_3$ )  $\delta$  8.00 (dd, 1H,  $J = 8.4$  Hz,  $J = 0.8$  Hz), 7.78 (dd, 2H,  $J = 8.4$  Hz,  $J = 2.0$  Hz), 7.58 (dd, 2H,  $J = 8.8$  Hz,  $J = 1.2$  Hz), 7.38 – 7.34 (m, 1H), 7.28 – 7.22 (m, 3H), 5.53 (dd, 1H,  $J = 8.0$  Hz,  $J = 6.8$  Hz), 4.16 (d, 1H,  $J = 17.2$  Hz), 4.02 (d, 1H,  $J = 17.2$  Hz), 2.91 (dd, 1H,  $J = 18.0$  Hz,  $J = 6.4$  Hz), 2.72 (dd, 1H,  $J = 18.4$  Hz,  $J = 8.8$  Hz), 2.35 (s, 3H);  $^{13}\text{C}$  NMR (125 MHz,  $\text{CDCl}_3$ )  $\delta$  213.6, 145.2, 135.5, 135.1, 130.0, 128.5, 126.9, 125.2, 123.4, 123.2, 121.4, 120.1, 113.8, 73.3, 70.9, 42.6, 21.6; IR (neat): 3112, 3054, 2918, 2849, 1761, 1447, 1369; MS ( $\text{ES}^+$ ) Calculated for  $[\text{C}_{19}\text{H}_{17}\text{NNaO}_4\text{S}]^+$ : 378.1; Found: 378.1.

**5-Methyl-5-phenyldihydrofuran-3-one (4o)**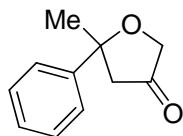**4o**

Compound **4o** was prepared in 58% yield using **5** as oxidant according to the general procedure. The reaction time was 6 h.  $^1\text{H}$  NMR (400 MHz,  $\text{CDCl}_3$ )  $\delta$  7.40 – 7.33 (m, 4H), 7.29 – 7.24 (m, 1H), 4.14 (d, 1H,  $J = 17.2$  Hz), 3.95 (d, 1H,  $J = 17.2$  Hz), 2.91 (d, 1H,  $J = 17.2$  Hz), 2.68 (d, 1H,  $J = 17.6$  Hz), 1.66 (s, 3H);  $^{13}\text{C}$  NMR (125 MHz,  $\text{CDCl}_3$ )  $\delta$  214.8, 144.4, 128.6, 127.4, 124.7, 83.7, 70.3, 49.9, 30.1; IR (neat): 2980, 2930, 1762, 1447, 1375; MS ( $\text{ES}^+$ ) Calculated for  $[\text{C}_{11}\text{H}_{12}\text{NaO}_2]^+$ : 199.1; Found: 199.1.

**4-Butyldihydrofuran-3-one (4p)**

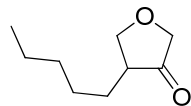**4p**

Compound **4p** was prepared in 65% yield using **5** as oxidant according to the general procedure. The reaction time was 3 h.  $^1\text{H}$  NMR (400 MHz,  $\text{CDCl}_3$ )  $\delta$  4.42 (dd, 1H,  $J = 8.4$  Hz,  $J = 9.2$  Hz), 4.02 (d, 1H,  $J = 16.8$  Hz), 3.82 – 3.75 (m, 2H), 2.46 – 2.40 (m, 1H), 1.79 – 1.74 (m, 1H), 1.40– 1.24 (m, 7H), 0.88 (t, 3H,  $J = 6.8$  Hz);  $^{13}\text{C}$  NMR (125 MHz,  $\text{CDCl}_3$ )  $\delta$  216.9, 72.5, 71.0, 47.2, 31.6, 27.8, 27.2, 22.4, 13.9; IR (neat): 2931, 2859, 1760, 1462; Calculated for  $[\text{C}_9\text{H}_{16}\text{NaO}_2]^+$ : 179.1; Found: 179.1.

### Hexahydrobenzofuran-3-one (**4q**)

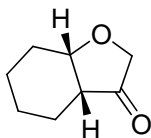**4q**

Compound **4q** was prepared in 82% yield using **5** as oxidant according to the general procedure, and its spectroscopic data match well with those reported.<sup>12</sup> The reaction time was 4 h.  $^1\text{H}$  NMR (400 MHz,  $\text{CDCl}_3$ )  $\delta$  4.35 (dd, 1H,  $J = 11.2$  Hz,  $J = 6.4$  Hz), 4.09 (d, 1H,  $J = 17.2$  Hz), 3.93 (d, 1H,  $J = 16.8$  Hz), 2.43 (dd, 1H,  $J = 13.6$  Hz,  $J = 6.8$  Hz), 1.82 – 1.56 (m, 6H), 1.44 – 1.33 (m, 2H);  $^{13}\text{C}$  NMR (125 MHz,  $\text{CDCl}_3$ )  $\delta$  216.8, 76.7, 69.9, 46.7, 27.7, 23.0, 22.4, 20.9; IR (neat): 2937, 2858, 1756, 1448.

### Hexahydro-benzofuran-3-one (**4r**)

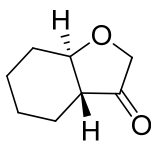**4r**

Compound **4r** was prepared in 88% yield at 0 °C using **5** as oxidant according to the general procedure, and its spectroscopic data match well with those reported.<sup>13</sup> The reaction time was 5 h. Due to its propensity for epimerization, the reaction mixture was washed with saturated aqueous  $\text{NaHCO}_3$  before concentration instead of direct

concentration, and the resulting residue was passed through silica gel column quickly.  $^1\text{H}$  NMR (400 MHz,  $\text{CDCl}_3$ )  $\delta$  4.17 (dd, 1H,  $J = 16.0$  Hz,  $J = 1.2$  Hz), 3.80 (d, 1H,  $J = 17.6$  Hz), 3.48 (dt, 1H,  $J = 11.6$  Hz,  $J = 4.0$  Hz), 2.28 – 2.25 (m, 1H), 2.14 – 2.09 (m, 1H), 1.95 – 1.88 (m, 2H), 1.84 – 1.81 (m, 1H), 1.62 – 1.53 (m, 1H), 1.31 – 1.16 (m, 3H);  $^{13}\text{C}$  NMR (125 MHz,  $\text{CDCl}_3$ )  $\delta$  214.5, 82.3, 72.0, 53.7, 32.3, 25.1, 23.8, 23.0; IR (neat): 2939, 2863, 1763, 1447, 1358.

#### 4-Hydroxy-2-oxoundecyl methanesulfonate (7)

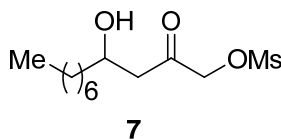

$^1\text{H}$  NMR (400 MHz,  $\text{CDCl}_3$ )  $\delta$  4.83 (s, 2H), 4.17 – 4.07 (m, 1H), 3.20 (s, 3H), 2.60 – 2.58 (m, 2H), 2.38 (d, 1H,  $J = 4.4$  Hz), 1.57 – 1.25 (m, 12H), 0.88 (t, 3H,  $J = 7.2$  Hz);  $^{13}\text{C}$  NMR (125 MHz,  $\text{CDCl}_3$ )  $\delta$  203.3, 72.0, 67.7, 45.6, 38.9, 36.9, 31.7, 29.4, 29.2, 25.4, 22.6, 14.1; IR (neat): 2922, 2851, 1762, 1367; Calculated for  $[\text{C}_{12}\text{H}_{24}\text{NaO}_5\text{S}]^+$ : 303.1; Found: 303.1.

#### Reference:

- Viola, A.; MacMillan, J. H. *J. Am. Chem. Soc.* **1968**, *90*, 6141–6145.
- Cui, L.; Peng, Y.; Zhang, L. *J. Am. Chem. Soc.* **2009**, *131*, 8394–8395.
- Trost, B. M.; Zachary, T. B. *J. Am. Chem. Soc.* **2005**, *127*, 17644–17655.
- Kato, K.; Motodate, S.; Mochida, T.; Kobayashi, T.; Akita, H. *Angew. Chem., Int. Ed.* **2009**, *48*, 3326–3328.
- Tummatorn, J.; Dudley, G. B. *J. Am. Chem. Soc.* **2008**, *130*, 5050–5051.
- Ma, X.; Wang, J.-X.; Li, S.; Wang, K.-H.; Huang, D. *Tetrahedron* **2009**, *65*, 8683–8689.
- Tsukamoto, H.; Kondo, Y. *Angew. Chem., Int. Ed.* **2008**, *47*, 4851–4854.
- Vadola, P. A.; Sames, D. *J. Am. Chem. Soc.* **2009**, *131*, 16525–16528.
- Hwang, C. H.; Chong, Y. H.; Song, S. Y.; Kwak, H. S.; Lee, E. *Chem. Commun.*, **2004**, 816–817.
- Clark, J. S.; Dossetter, A. G.; Wong, Y.-S.; Townsend, R. J.; Whittingham, W. G.;

- Russell, C. A. *J. Org. Chem.* **2004**, *69*, 3886-3898.
11. Ciufolini, M. A.; Deaton, M. V.; Zhu, S.; Chen, M. *Tetrahedron* **1997**, *53*, 16299-16312.
12. Matos, J. R.; Wong, C. H. *J. Org. Chem.* **1986**, *51*, 2388-2389.
13. Paterson, I.; Fleming, I. *Tetrahedron Lett.* **1979**, *11*, 993-994.

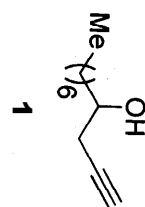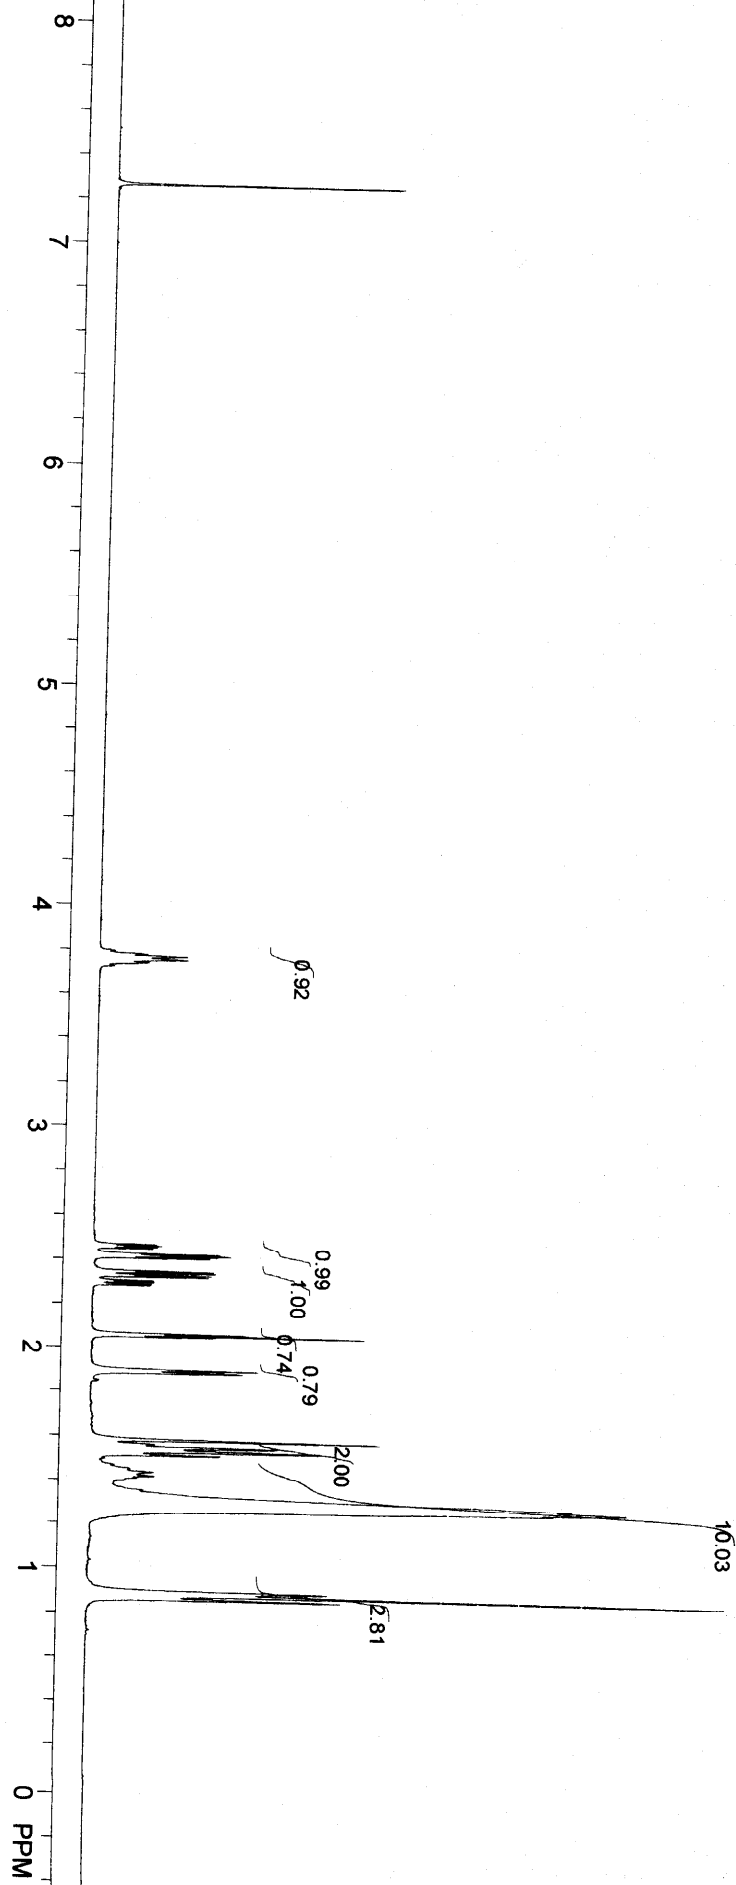

y1w-3-71-c

Data Collected on:  
nmr500-inova500  
Archive directory:  
/export/home/vnmr1/vnmr-sys/data  
Sample directory:

File: CARBON

Pulse Sequence: s2pu1  
Solvent: cdcl3  
Temp. 22.0 C / 295.1 K  
Operator: lye

Relax. delay: 3.000 sec  
Pulse: 58.7 degrees  
Acq. time: 1.300 sec  
Width: 40000.0 Hz  
108 repetitions  
OBSERVE: C13, 125.6889841 MHz  
DECOUPLE: H1, 499.8588575 MHz  
Power: 36 dB  
on during acquisition  
off during delay  
WALTZ-16 modulated  
DATA PROCESSING  
Line broadening: 0.5 Hz  
FT size: 131072  
Total time: 0 min

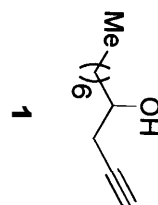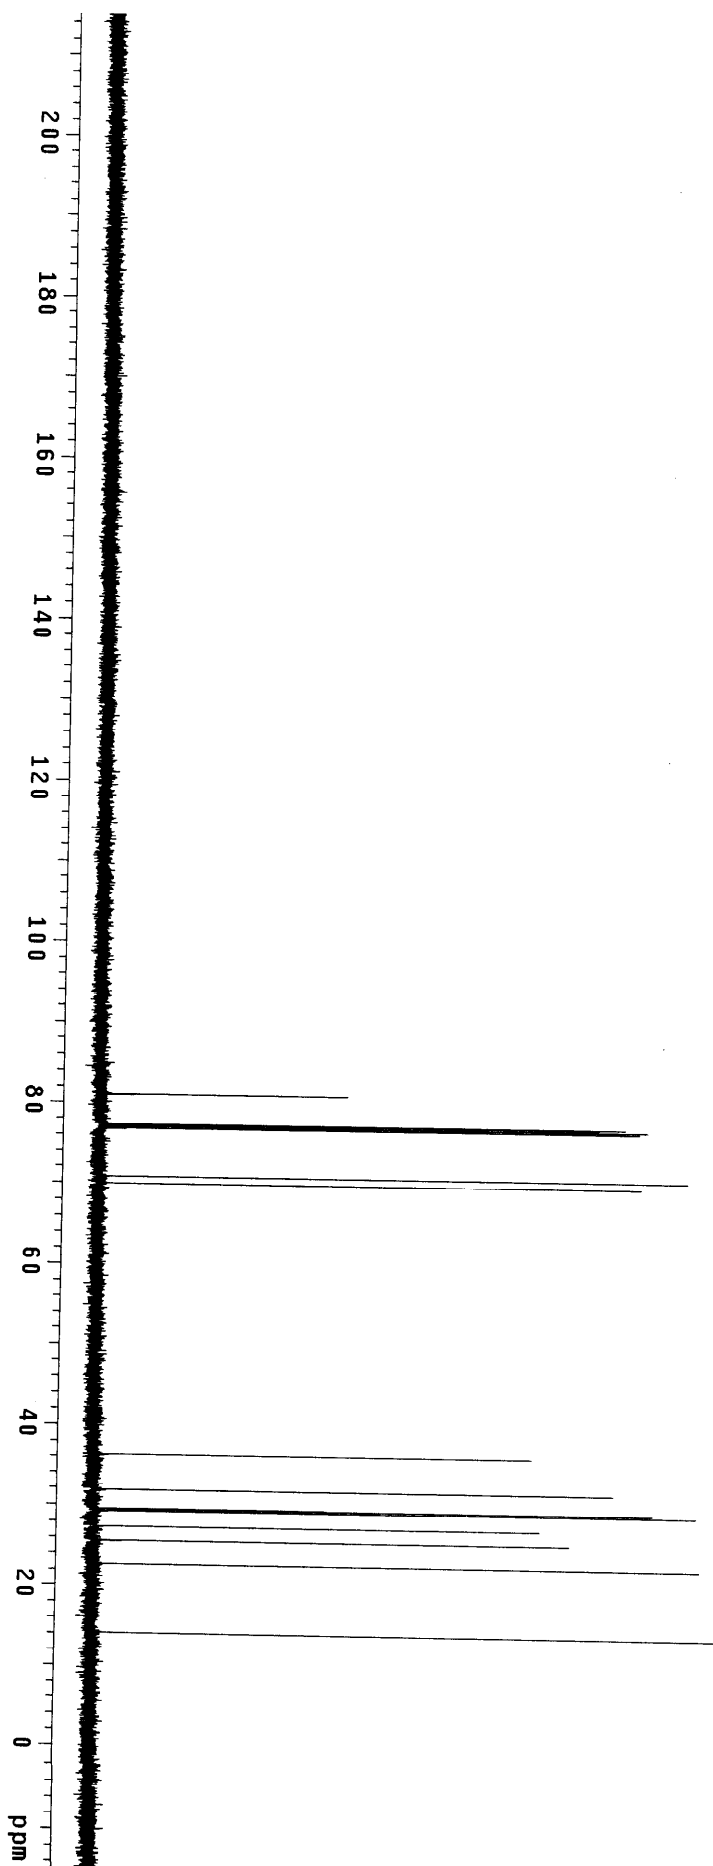



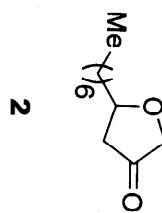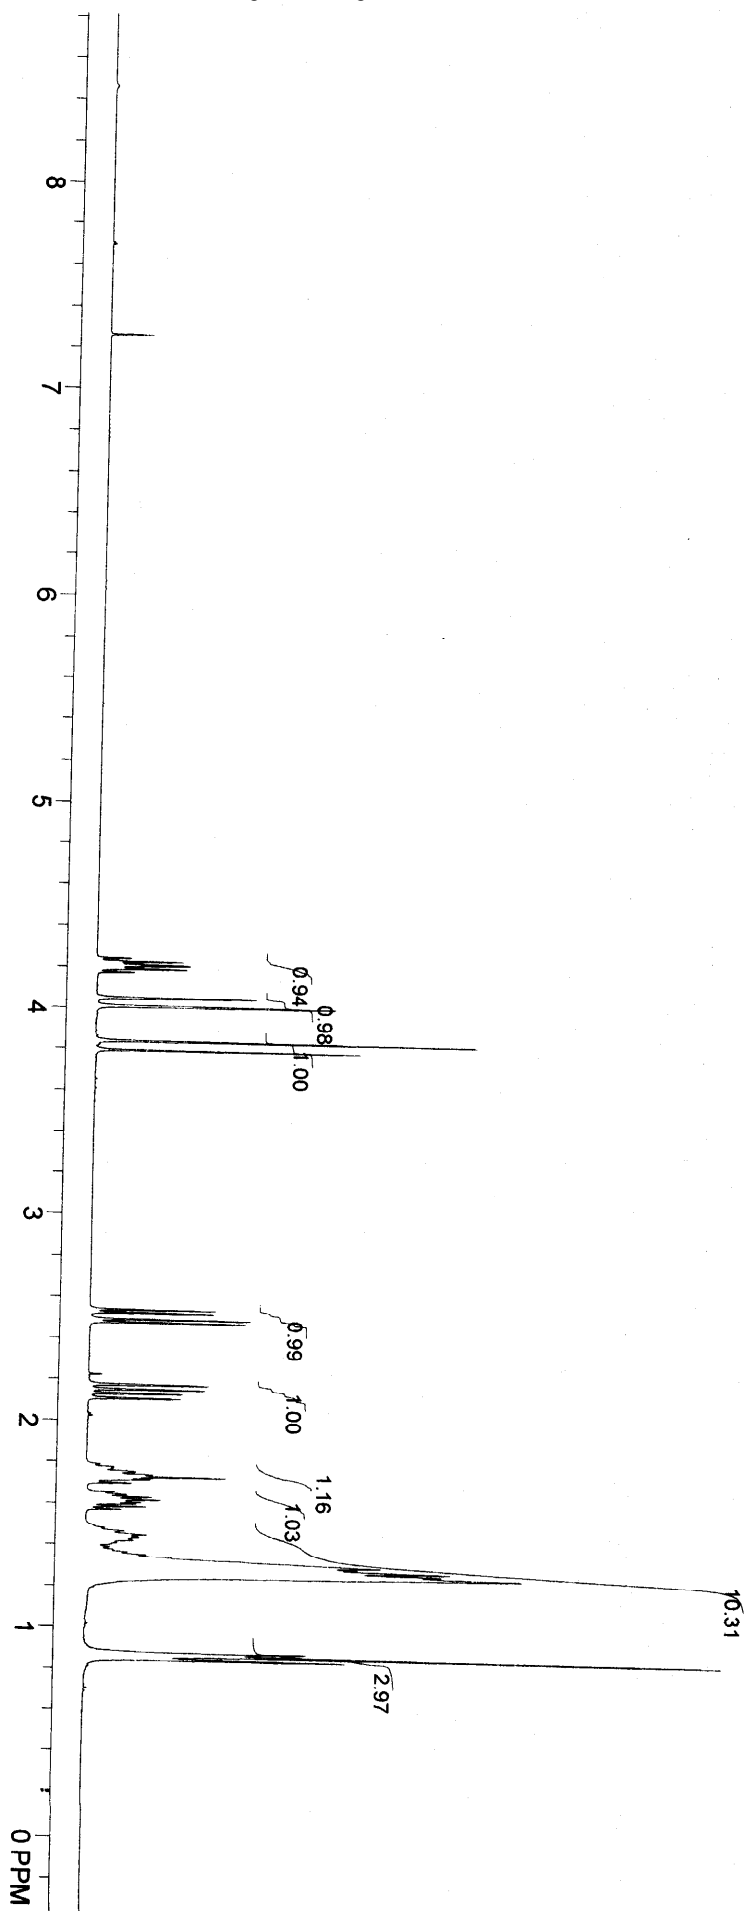

Y1W-3-118-c

Data Collected on:  
nmr500-inova500  
Archive directory:  
/export/home/vnmr1/vnmr-sys/data  
Sample directory:

File: CARBON

Pulse Sequence: s2pu1  
Solvent: cdcl3  
Temp: 22.0 C / 295.1 K  
Operator: lye

Relax. delay 3.000 sec  
Pulse 58.7 degrees  
Acq. time 1.300 sec  
Width 40000.0 Hz  
52 Repetitions  
OBSERVE C13, 125.6889866 MHz  
DECUPLE H1, 499.8588575 MHz  
Power 36 db  
on during acquisition  
off during delay  
WALTZ-16 modulated  
DATA PROCESSING  
Line broadening 0.5 Hz  
FT size 131072  
Total time 0 min

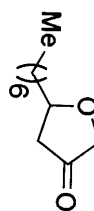**2**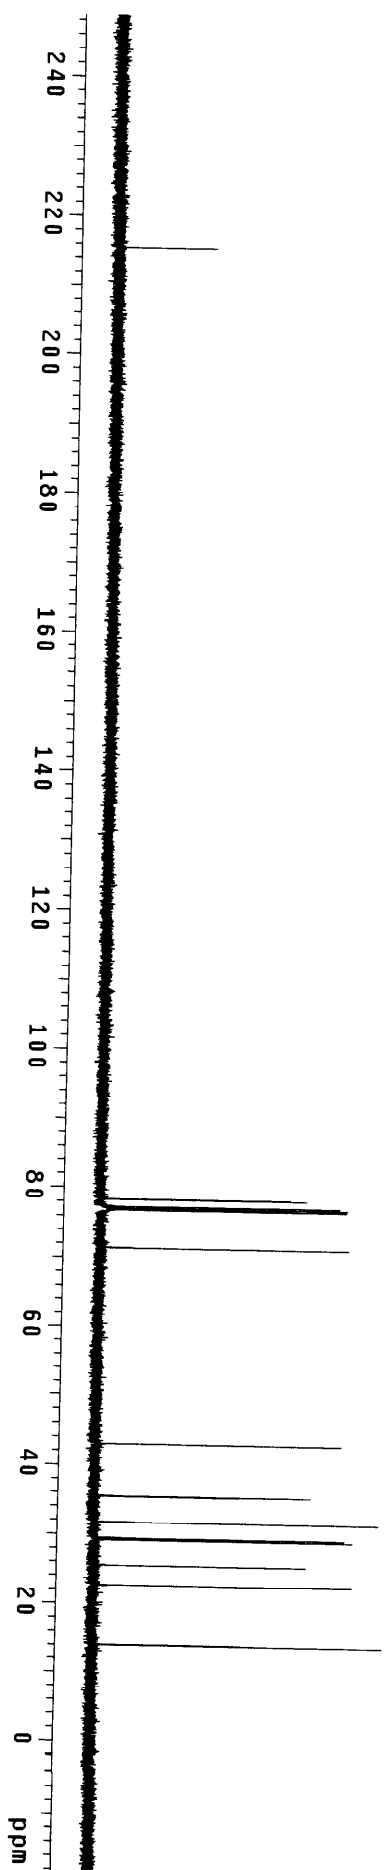

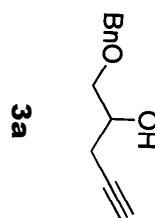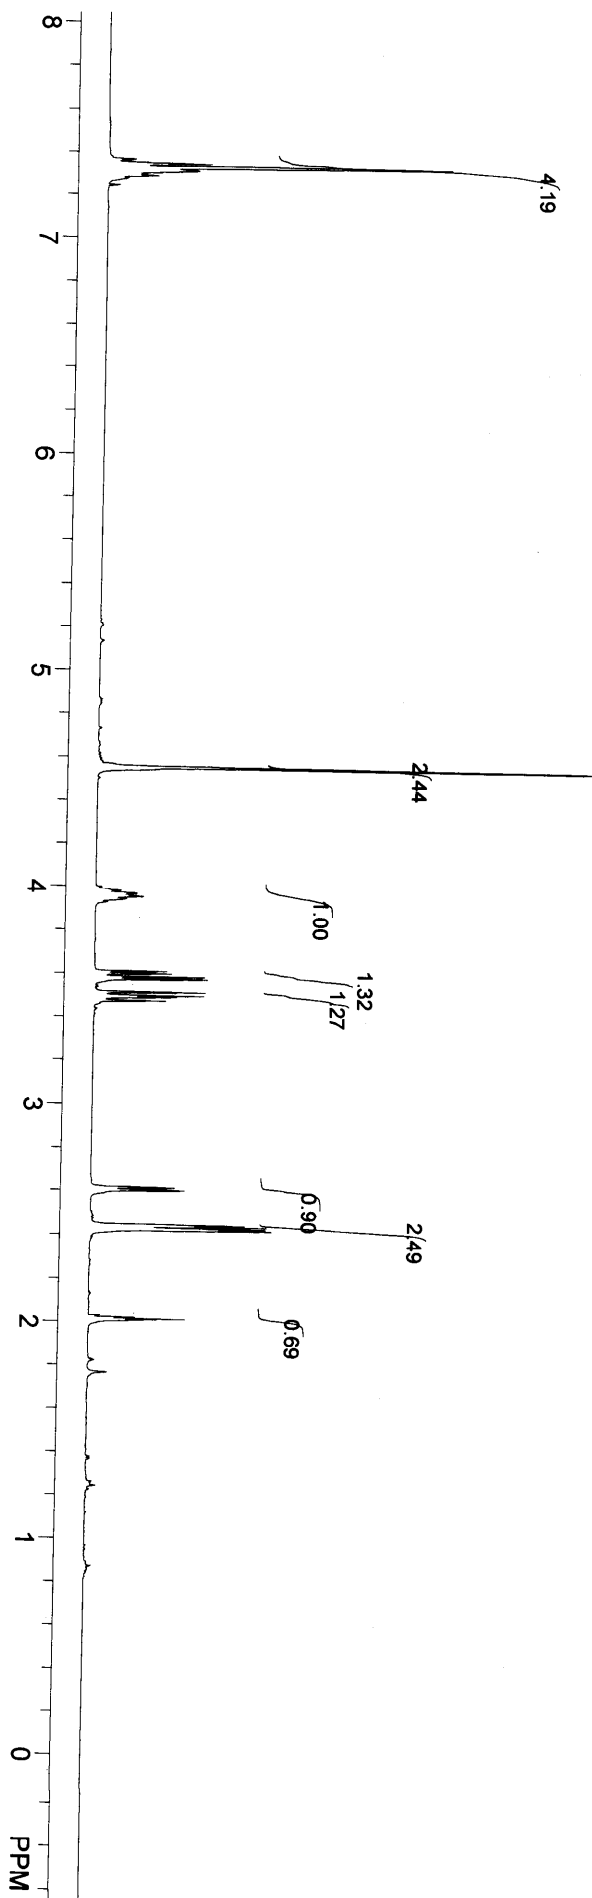

Y1W-3-164-c

Data Collected on:  
nmr500-inova500  
Archive directory:  
/export/home/yymr1/vnmr-sys/data  
Sample directory:

File: CARBON

Pulse Sequence: szpu1  
Solvent: cdcl3  
Temp. 22.0 C / 295.1 K  
Operator: lye

Relax. delay 3.000 sec  
Pulse 58.7 degrees  
Acq. time 1.300 sec  
Width 40000.0 Hz  
48 repetitions  
OBSERVE C13, 125.6889308 MHz  
DECUPLE H1, 499.8588575 MHz  
Power 36 dB  
on during acquisition  
off during delay  
WALTZ-16 modulated  
DATA PROCESSING  
Line broadening 0.5 Hz  
FT size 131072  
Total time 0 min

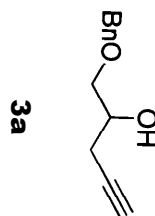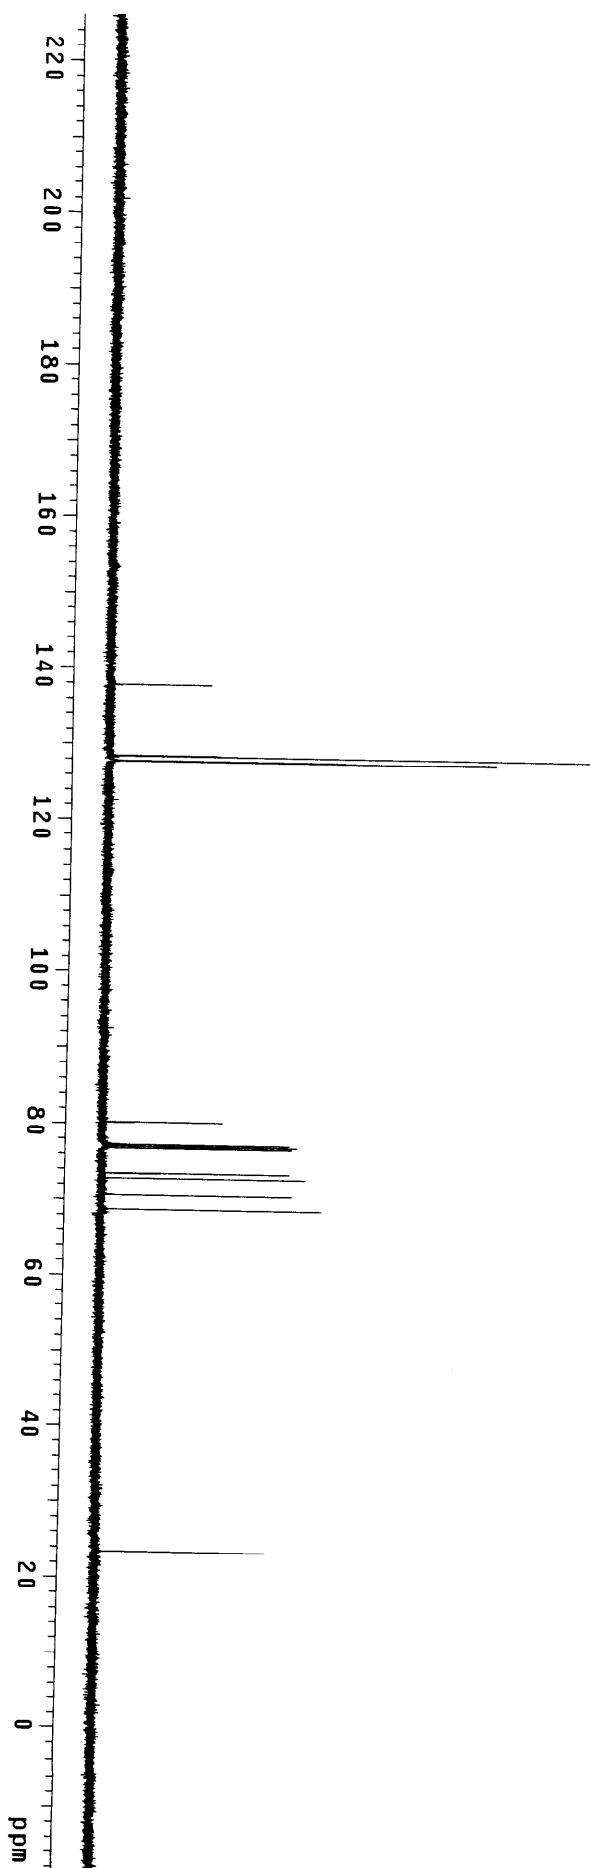

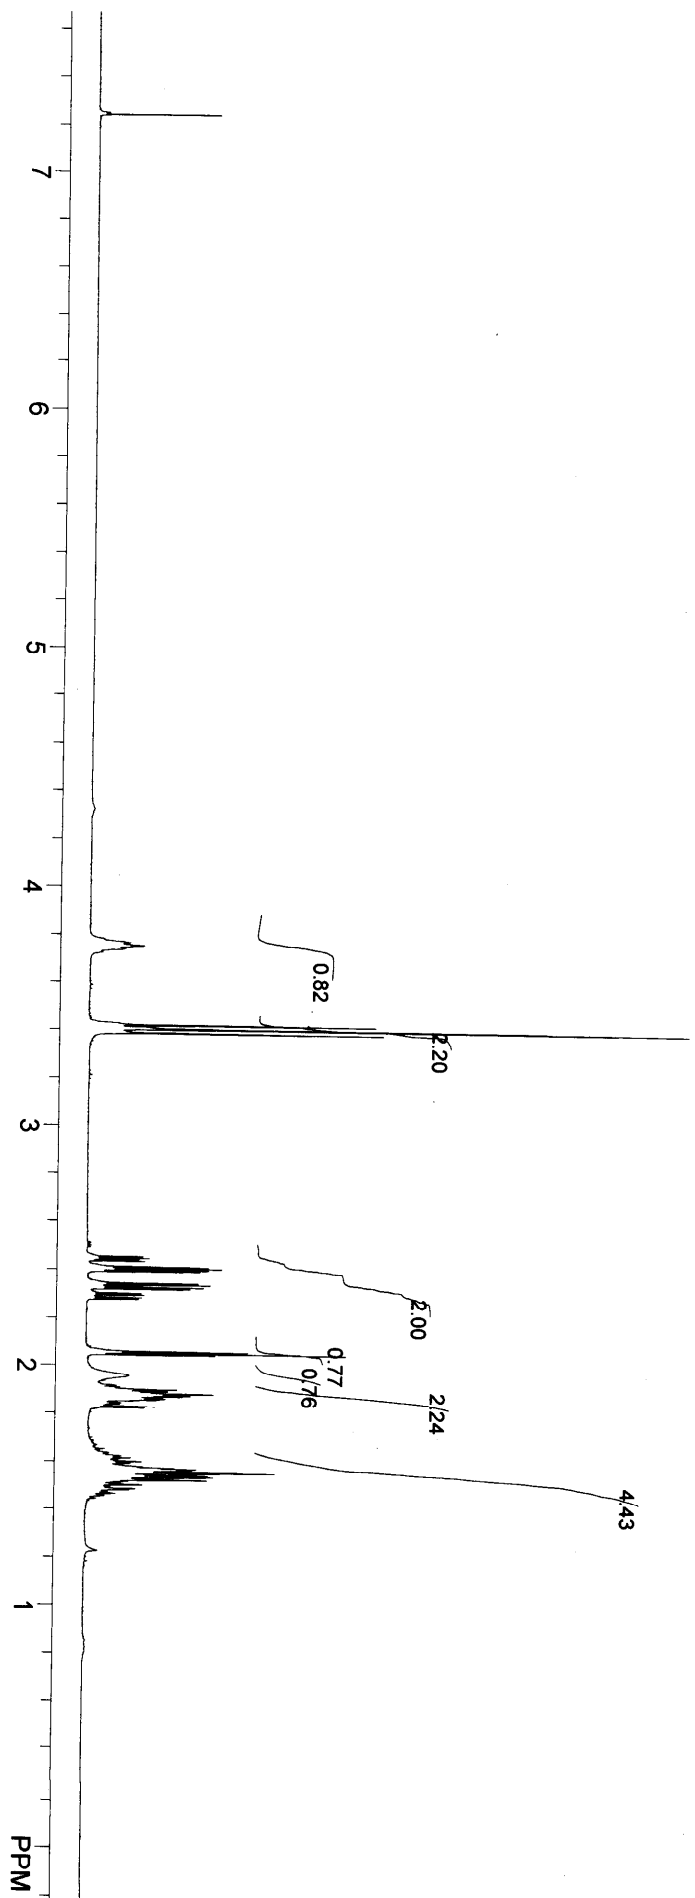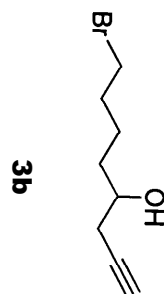

STANDARD CARBON PARAMETERS  
 expl CARBON

|             |                |            |          |
|-------------|----------------|------------|----------|
| date        | Jan 1 2010     | temp       | 22.0     |
| solvent     | cdcl3          | gain       | 54       |
| file        | /home/Zhang/g* | spin       | 20       |
| uzhang      | /C13-2009121*  | hst        | 0.008    |
|             | 8-1.fid        | pw90       | 9.200    |
|             |                | atfa       | 10.000   |
| ACQUISITION |                |            |          |
| sw          | 34995.6        | flags      |          |
| at          | 1.301          | l1         | n        |
| np          | 91024          | in         | n        |
| fb          | 19000          | dp         | y        |
| bs          | 4              | hs         | nn       |
| di          | 3.000          | PROCESSING |          |
| nt          | 12000          | lb         | 0.50     |
| ct          | 48             | isfid      | 2        |
| TRANSMITTER |                |            |          |
| tn          | C13            | fn         | not used |
| sfrq        | 125.702        | sp         | DISPLAY  |
| tof         | 865.4          | wp         | -1918.6  |
| tpwr        | 56             | rf1        | 22900.7  |
| pw          | 6.000          | rfp        | 14402.3  |
| DECOUPLER   |                |            |          |
| dn          | H1             | fp         | 9678.1   |
| dof         | 0              | tp         | -918.7   |
| PLOT        |                |            |          |
| dm          | nny            | wc         | 250      |
| decwave     | 36             | sc         | 0        |
| dpwr        | vs             | th         | 6466     |
| dmf         | 11101          | ai         | 11       |
|             |                | at         | cdc      |
|             |                | ph         |          |

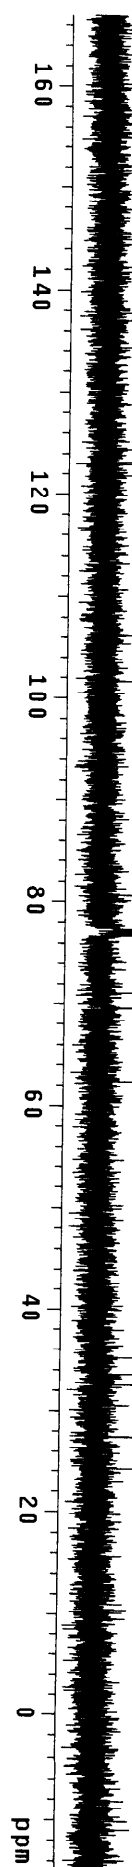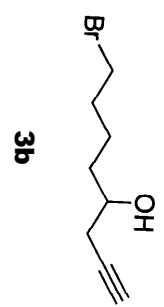

1jcut-3-108-1-SM-1H  
File: home/Zhang/1jcut/1jcut-3-108-1-SM-1H.fid  
Pulse Sequence: s2pu1  
Solvent: cdcl3  
Ambient temperature  
Operator: jcut  
File: 1jcut-3-108-1-SM-1H  
INOVA-400 "nmr400"  
Relax. delay 3.000 sec  
Pulse 48.5 degrees  
Acq. time 2.000 sec  
Width 5132.5 Hz  
8 Repetitions  
OBSERVE H1, 399.9486787 MHz  
DATA PROCESSING  
Line broadening 0.1 Hz  
FT size 65536  
Total time 10 min, 43 sec

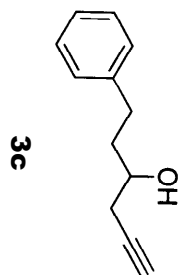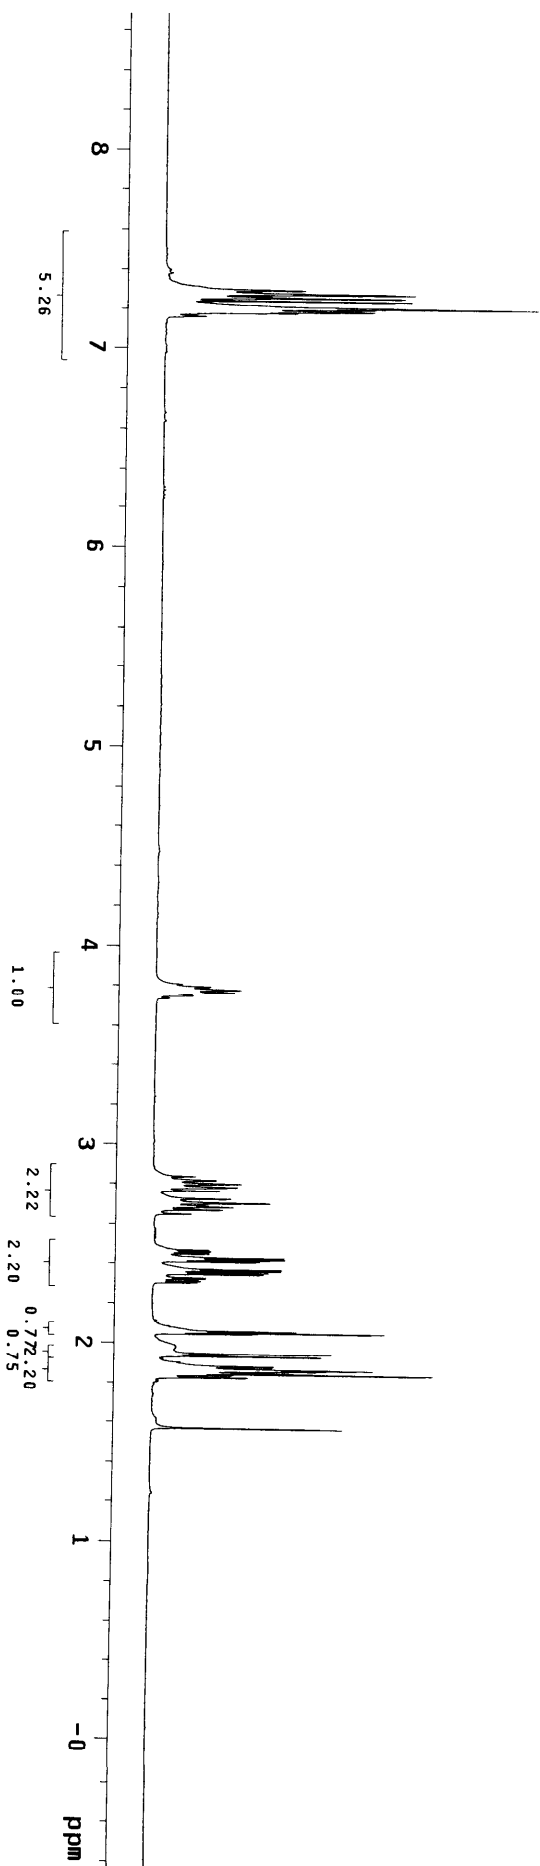

1tcui-3-108-1-SM-13C

Data Collected on:  
nmr300-inova500  
Archive directory:  
/export/home/vnmr1/vnmrSYS/data  
Sample directory:

File: CARBON

Pulse Sequence: szpu1  
Solvent: cdcl3  
Temp. 25.0 C / 298.1 K  
Operator: tcui

Relax. delay: 3.000 sec  
Pulse: 58.7 degrees  
Acq. time: 1.500 sec  
Width: 28258.8 Hz  
24 repetitions  
OBSERVE: C13, 125.6889361 MHz  
DECUPLE: H1, 499.8588575 MHz  
Power: 36 dB  
on during acquisition  
off during delay  
WALTZ-16 modulated  
DATA PROCESSING  
Line broadening: 1.0 Hz  
FT size: 131072  
Total time: 0 min

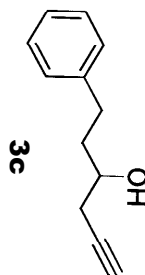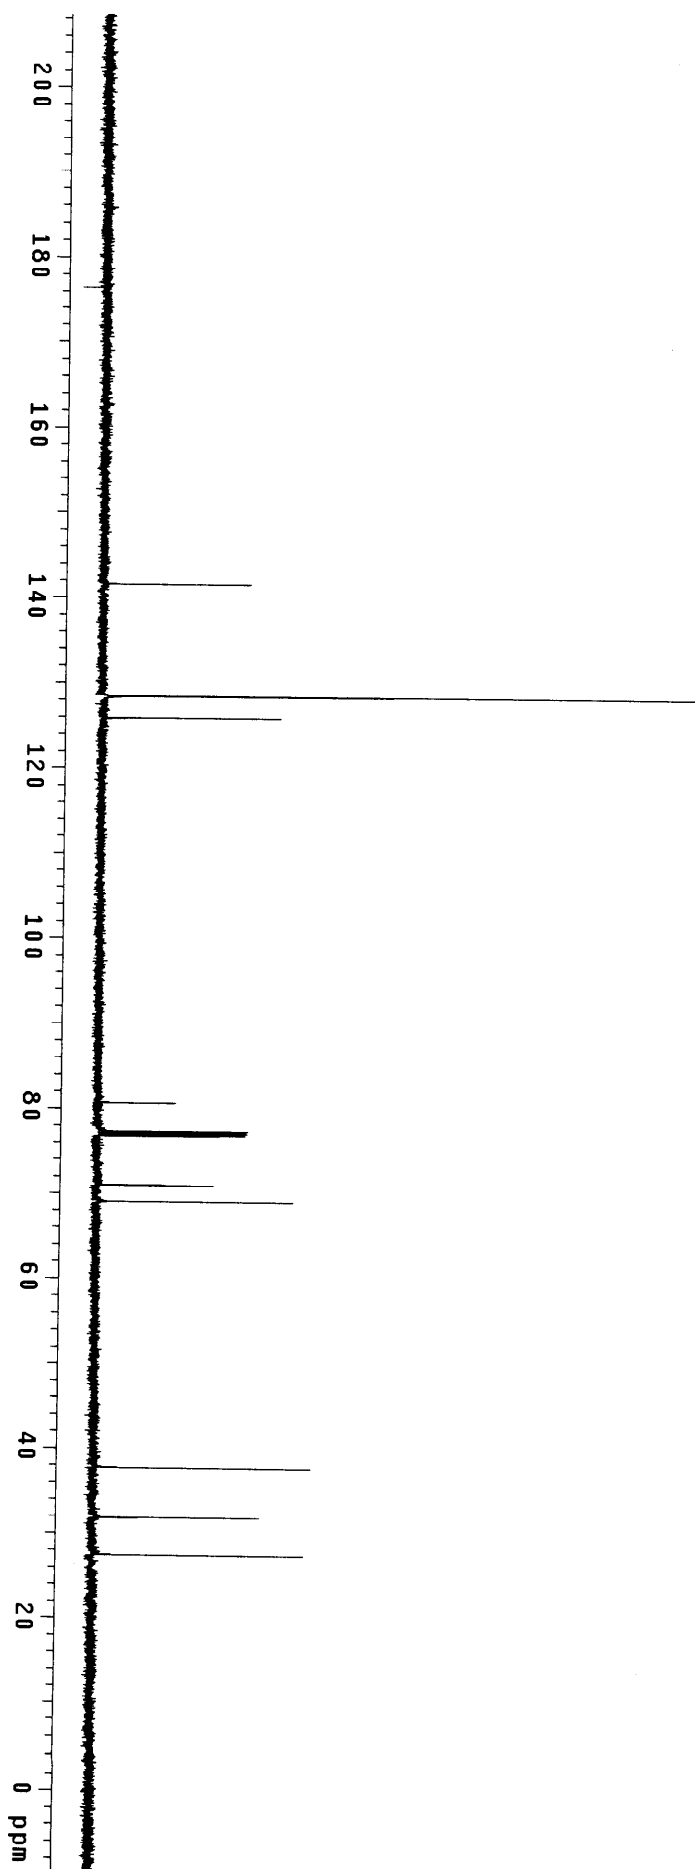



11cut-3-109-2-1H1  
 File: home/Zhang/11cut/11cut-3-109-2-1H1.f1d  
 Pulse Sequence: szpu1  
 Solvent: cdcl3  
 Ambient temperature  
 Operator: 11cut  
 File: 11cut-3-109-2-1H1  
 INOVA-400 "nmr400"

Relax. delay 3.000 sec  
 Pulse 48.5 degrees  
 Acq. time 2.000 sec  
 Width 5132.5 Hz  
 8 Repetitions  
 OBSERVE H1, 399.9486725 MHz  
 DATA PROCESSING  
 Line broadening 0.1 Hz  
 FT size 65536  
 Total time 10 min, 43 sec

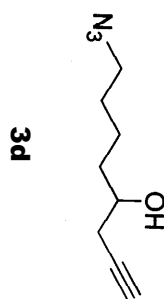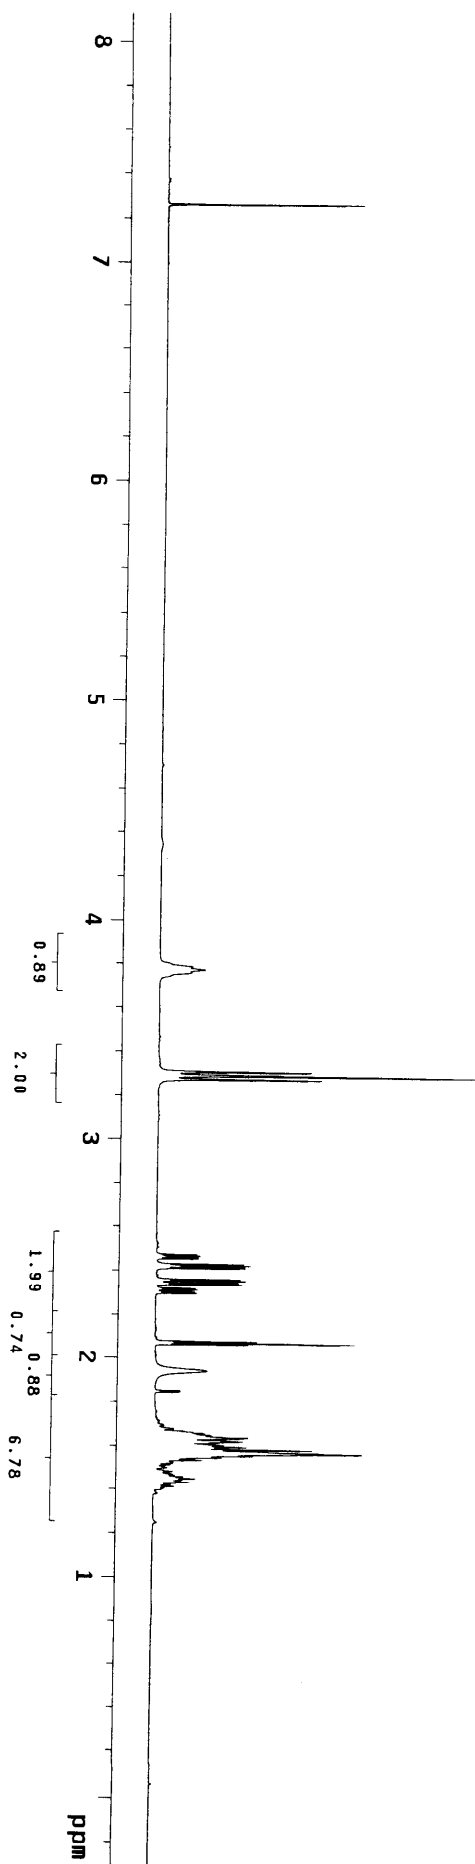

1cui-3-117-2-13C

Data Collected on:  
nmr500-11NOV0300  
Archive directory:  
/export/home/yymr1/vnmr-sys/data  
Sample directory:

File: CARBON

Pulse Sequence: szpu1

Solvent: cdcl3

Temp. 24.5 C / 297.6 K

Operator: 1cui

Relax. delay: 3.000 sec

Pulse 58.7 degrees

Acq. time 1.300 sec

Width 28258.8 Hz

40 repetitions

OBSERVE C13, 125.6889888 MHz

DECUPLE H1, 499.8588575 MHz

Power 36 dB

on during acquisition

off during delay

WALTZ-16 modulated

DATA PROCESSING

Line broadening 1.0 Hz

F1 size 131072

Total time 0 min

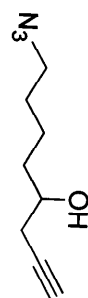**3d**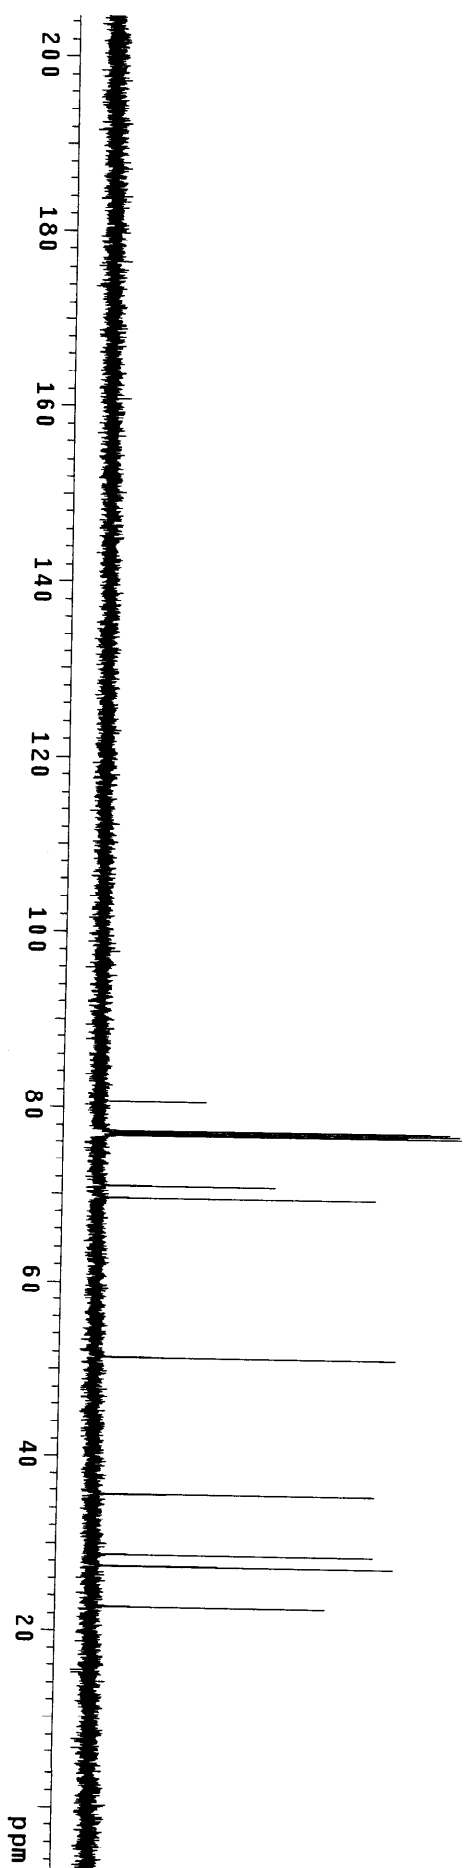

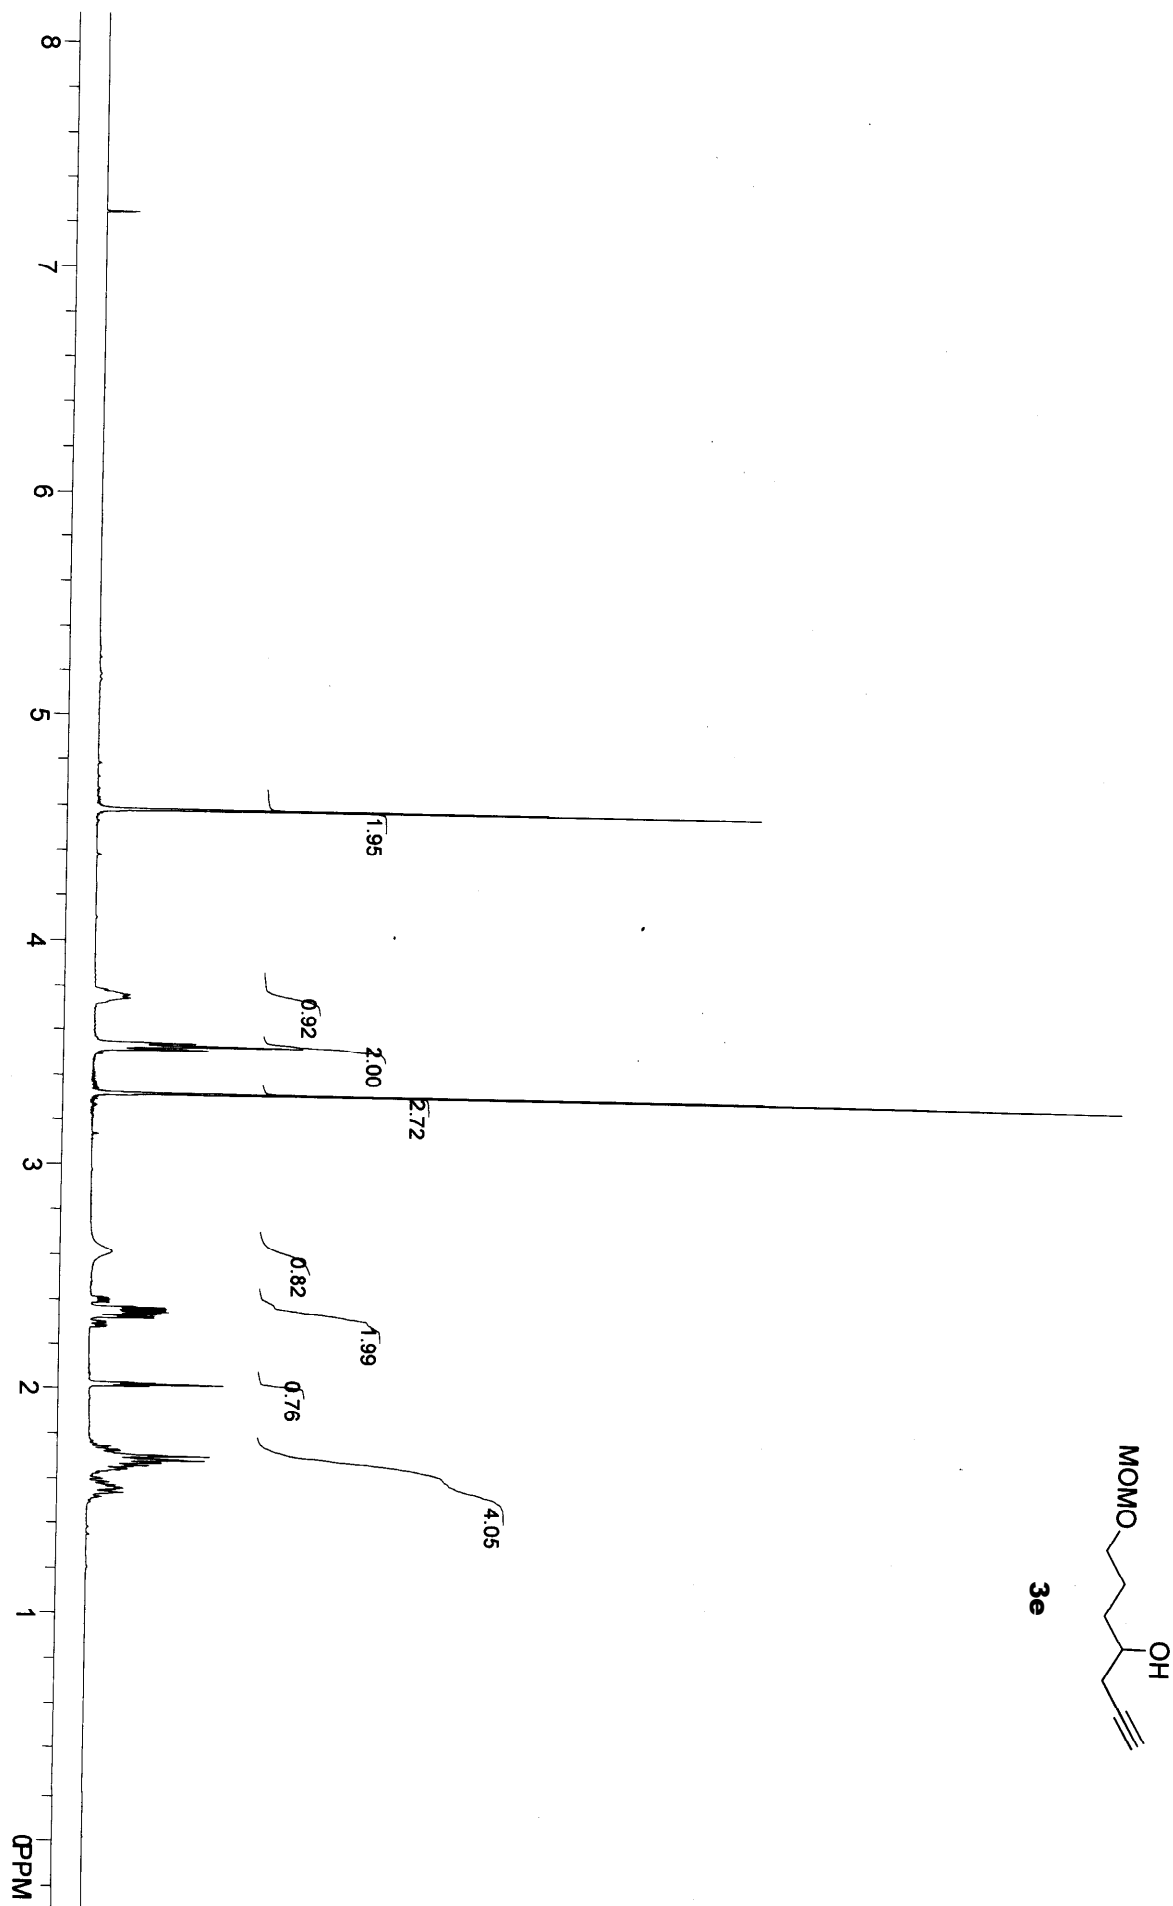

STANDARD CARBON PARAMETERS  
expi CARBON

|         |                |      |        |
|---------|----------------|------|--------|
| date    | Jan 1 2010     | temp | 22.0   |
| solvent | cdcl3          | gain | 54     |
| file    | /home/Zhang/g- | sp1n | 20     |
| uzhang  | /C13-2010010-  | hst  | 0.008  |
|         | 1-2.fid        | pw90 | 9.200  |
|         |                | alfa | 10.000 |

ACQUISITION

|    |         |            |          |
|----|---------|------------|----------|
| sw | 28258.6 | flags      |          |
| at | 1.300   | l1         | n        |
| np | 73498   | in         | n        |
| fb | 16000   | dp         | y        |
| bs | 4       | hs         | nn       |
| di | 3.000   | PROCESSING | 0.50     |
| nt | 12000   | lb         | 2        |
| ct | 52      | isfid      | not used |

TRANSMITTER

|      |         |      |         |
|------|---------|------|---------|
| tn   | C13     | fn   | DISPLAY |
| sfrq | 125.702 | sp   | -838.7  |
| lof  | 865.4   | wp   | 23653.4 |
| tpwr | 56      | rfl  | 11096.8 |
| pw   | 6.000   | rffp | 3678.1  |
|      |         | rp   | 95.1    |
|      |         | tp   | -913.3  |

DECOUPLER

|         |       |      |      |
|---------|-------|------|------|
| dn      | H1    | PL0T |      |
| dof     | 0     | WC   | 250  |
| dm      | mny   | SC   | 0    |
| decwave | vs    | th   | 5794 |
| dpwr    | 36    | ai   | 15   |
| dmf     | 11101 |      |      |

ai cdc ph

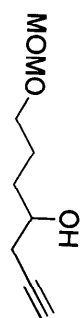

3e

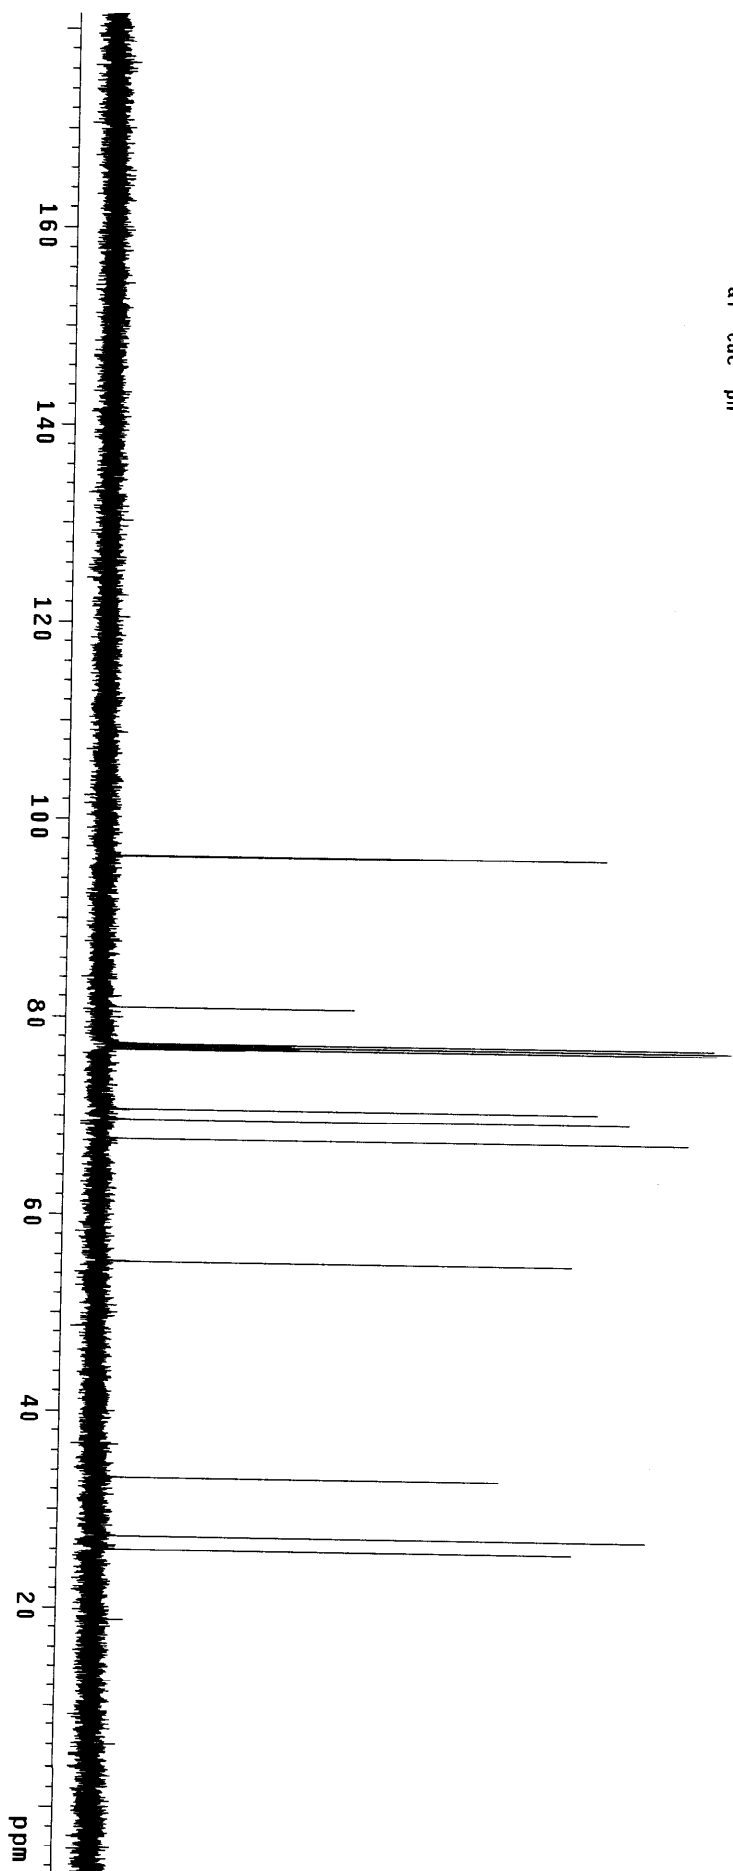

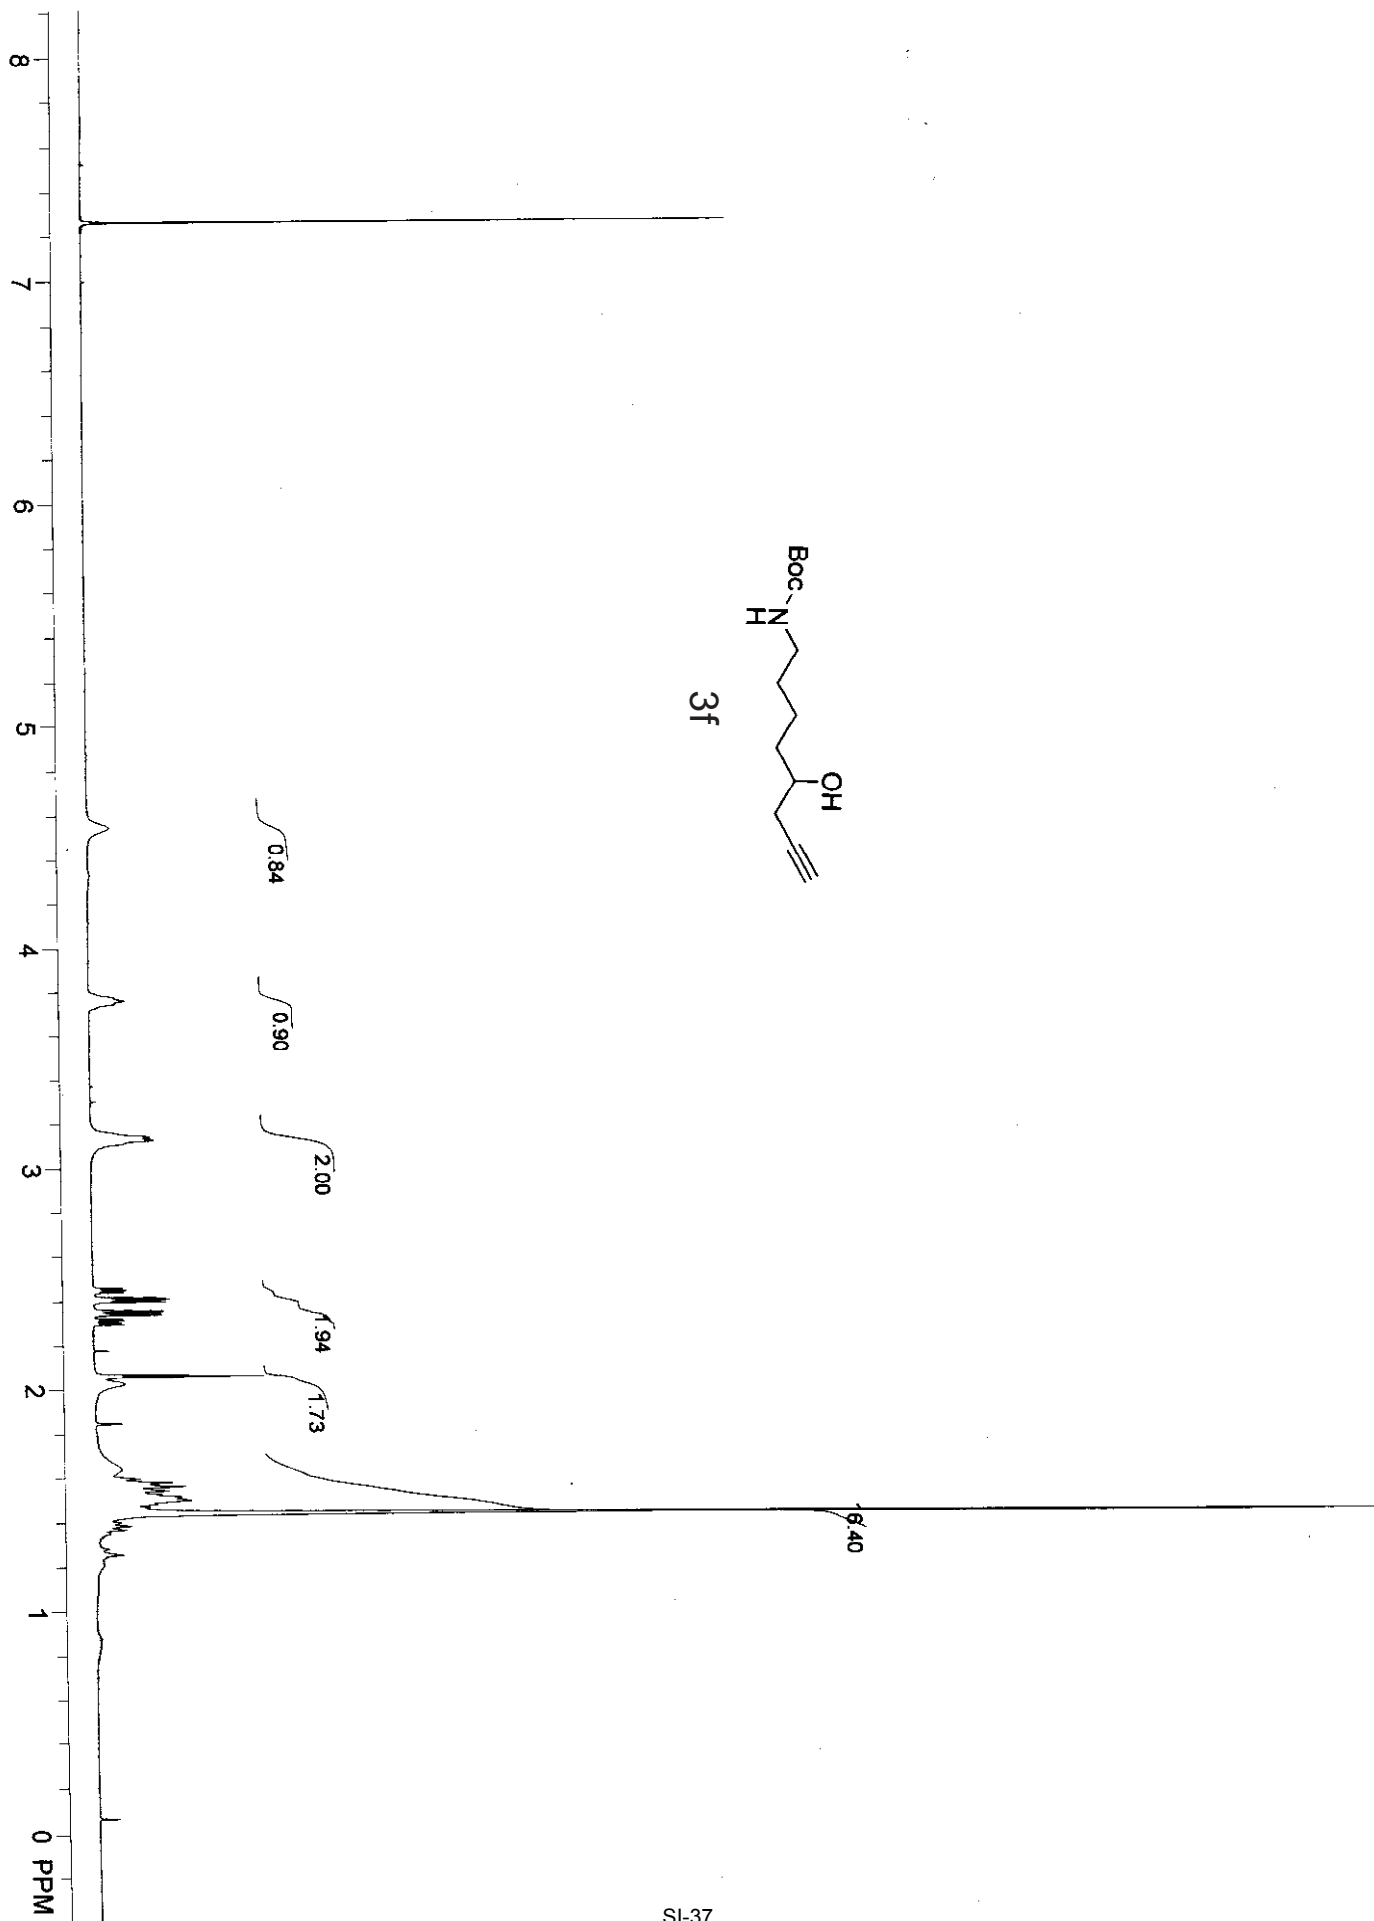

1juc1-106-1-13C

Data Collected on:  
nmr500-inox500  
Archive directory:  
/export/home/vmmr1/vnmr/sys/data  
Sample directory:

File: CARBON

Pulse Sequence: s2pu1  
Solvent: cdcl3  
Temp. 24.7 C / 297.9 K  
Operator: lcu1

Relax. delay 3.000 sec  
Pulse 58.7 degrees  
Acq. time 1.300 sec  
Width 29996.3 Hz  
56 repetitions

OBSERVE C13, 125.6888864 MHz  
DECUPLE H1, 499.8588575 MHz  
Power 36 dB

on during acquisition  
off during delay  
WALTZ-16 modulated  
DATA PROCESSING  
Line broadening 1.0 Hz  
FT size 131072  
Total time 0 min

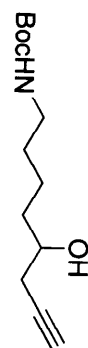

**3f**

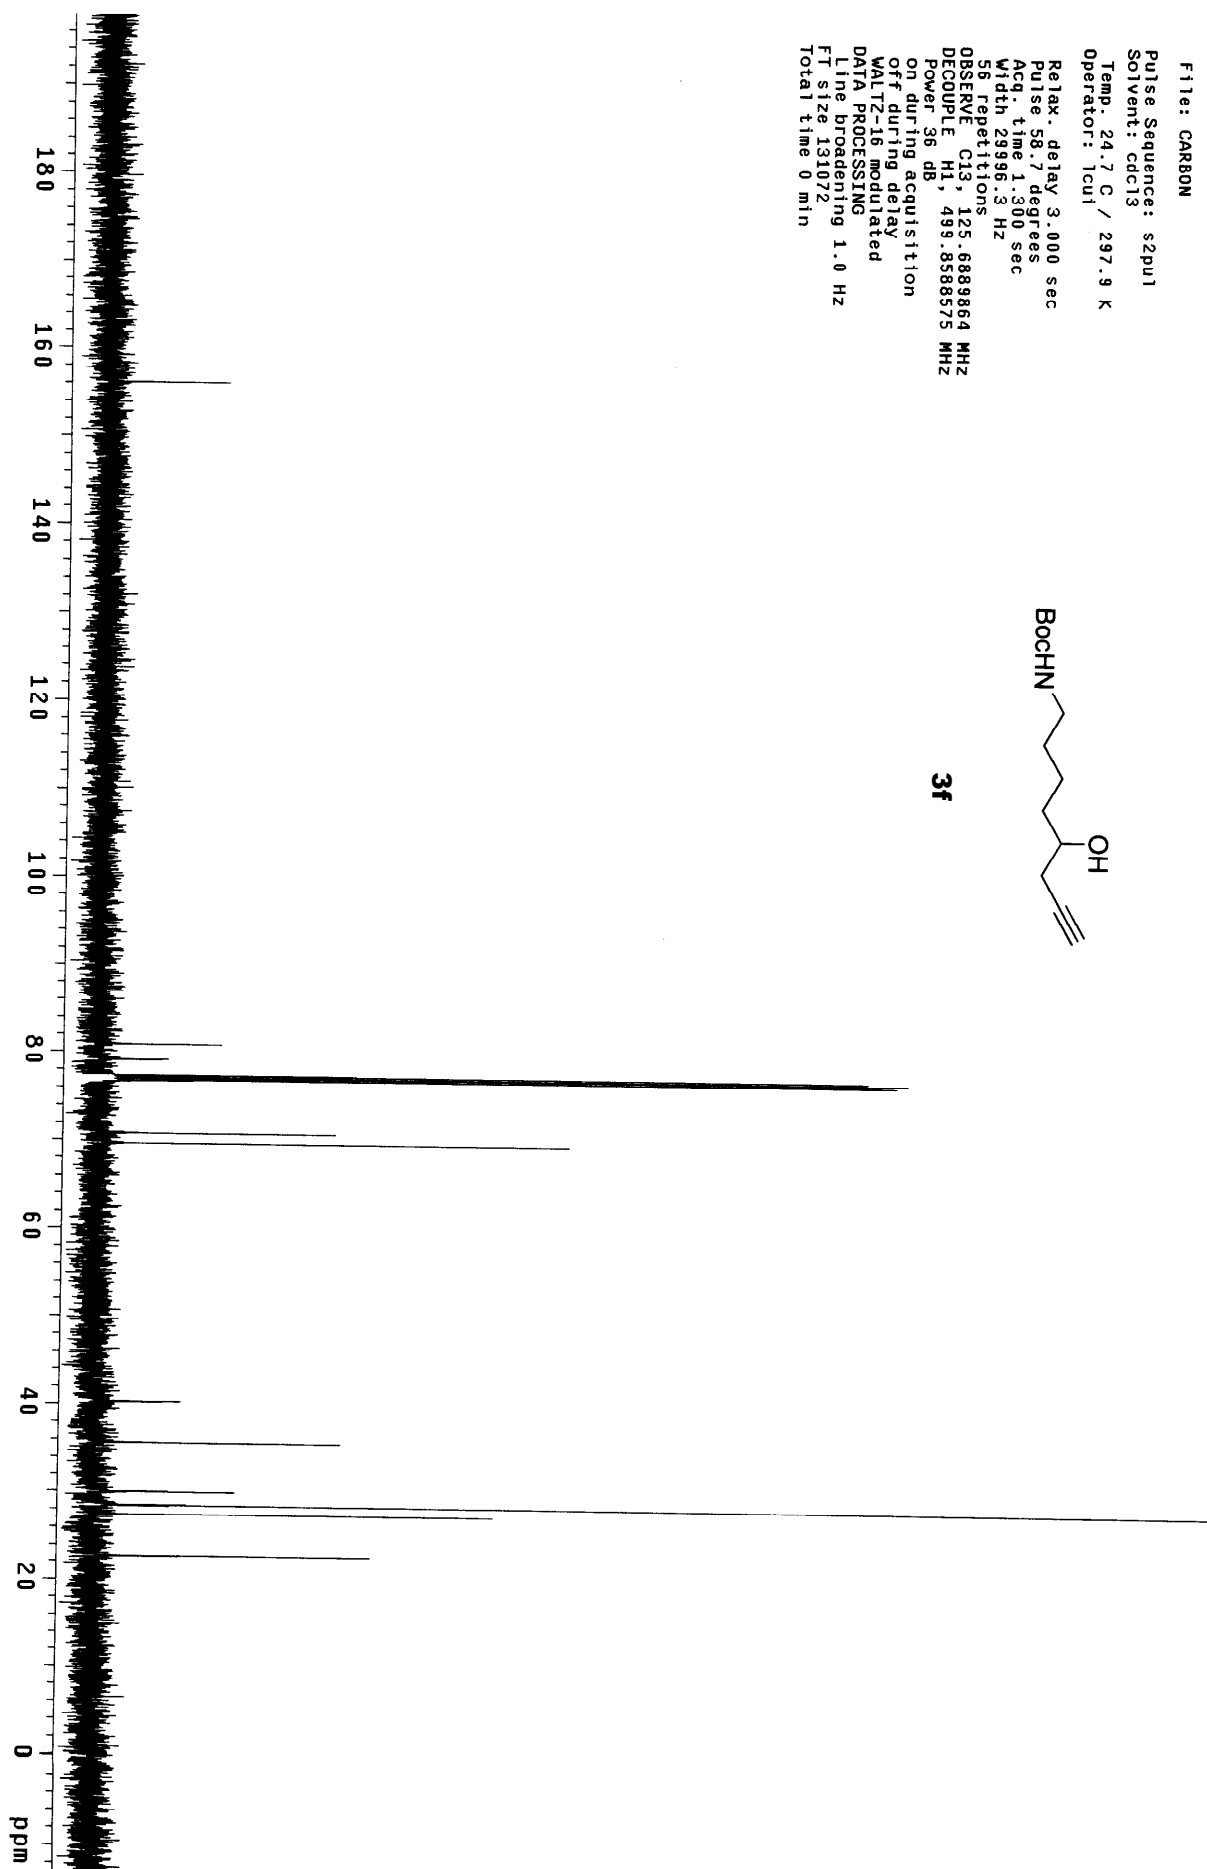

11cui-3-109-2-1H  
 Data Collected on:  
 mmr500-inova500  
 Archive directory:  
 /export/home/vmmr1/vmmr/sys/data  
 Sample directory:  
 File: H1  
 Pulse Sequence: s2pul1  
 Solvent: cdcl3  
 Operator: lcui  
 Relax. delay 2.000 sec  
 Pulse 56.8 degrees  
 Acq. time 2.668 sec  
 Width 5997.0 Hz  
 12 repetitions  
 OBSERVE H1 499.8563629 MHz  
 DATA PROCESSING  
 Resol. enhancement -0.0 Hz  
 FT size 32768  
 Total time 0 min

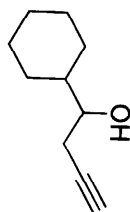

**3g**

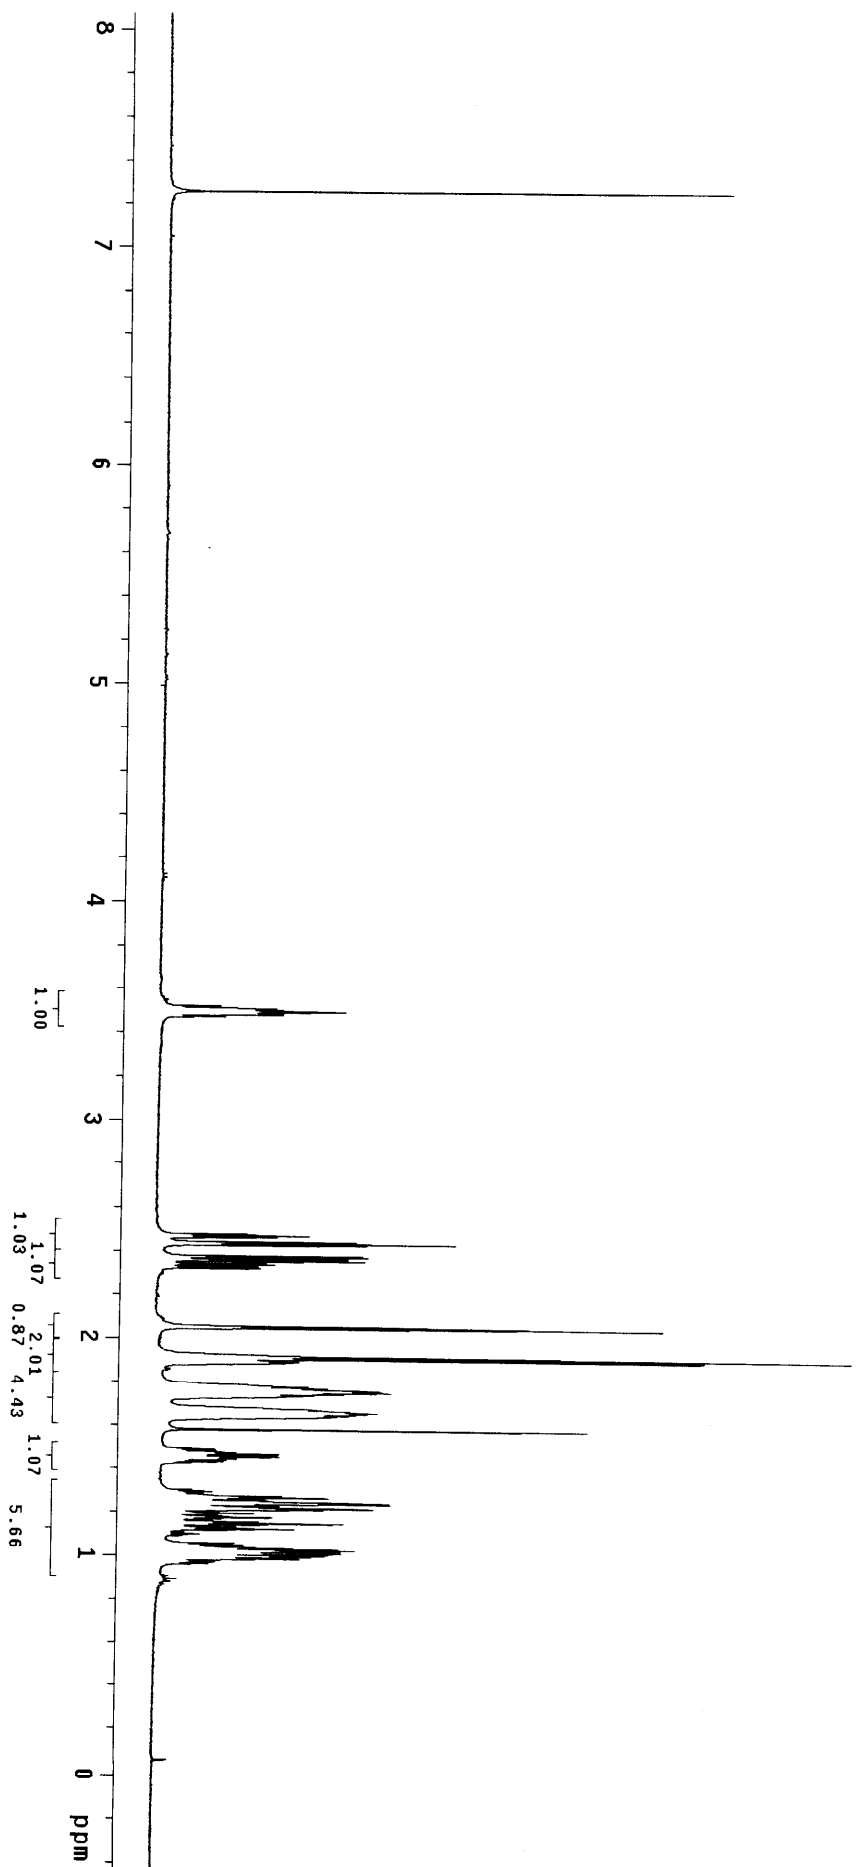

Y1W-3-169s-c

Data Collected on:  
nmr500-inova500  
Archive directory:  
/export/home/vmmr1/vmmr1/vmmr1/sys/data  
Sample directory:

File: CARBON

Pulse Sequence: s2pul  
Solvent: cdcl3  
Temp: 21.9 C / 295.1 K  
Operator: lye

Relax. delay 3.000 sec  
Pulse 58.7 degrees  
Acq. time 1.300 sec  
Width 40000.0 Hz

86 Repetitions  
OBSERVE C13, 125.6889872 MHz  
DECUPLE H1, 499.8588575 MHz  
Power 36 db

on during acquisition  
off during delay  
WALTZ-16 modulated  
DATA PROCESSING  
Line broadening 0.5 Hz  
FI size 131072  
Total time 0 min

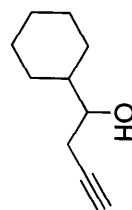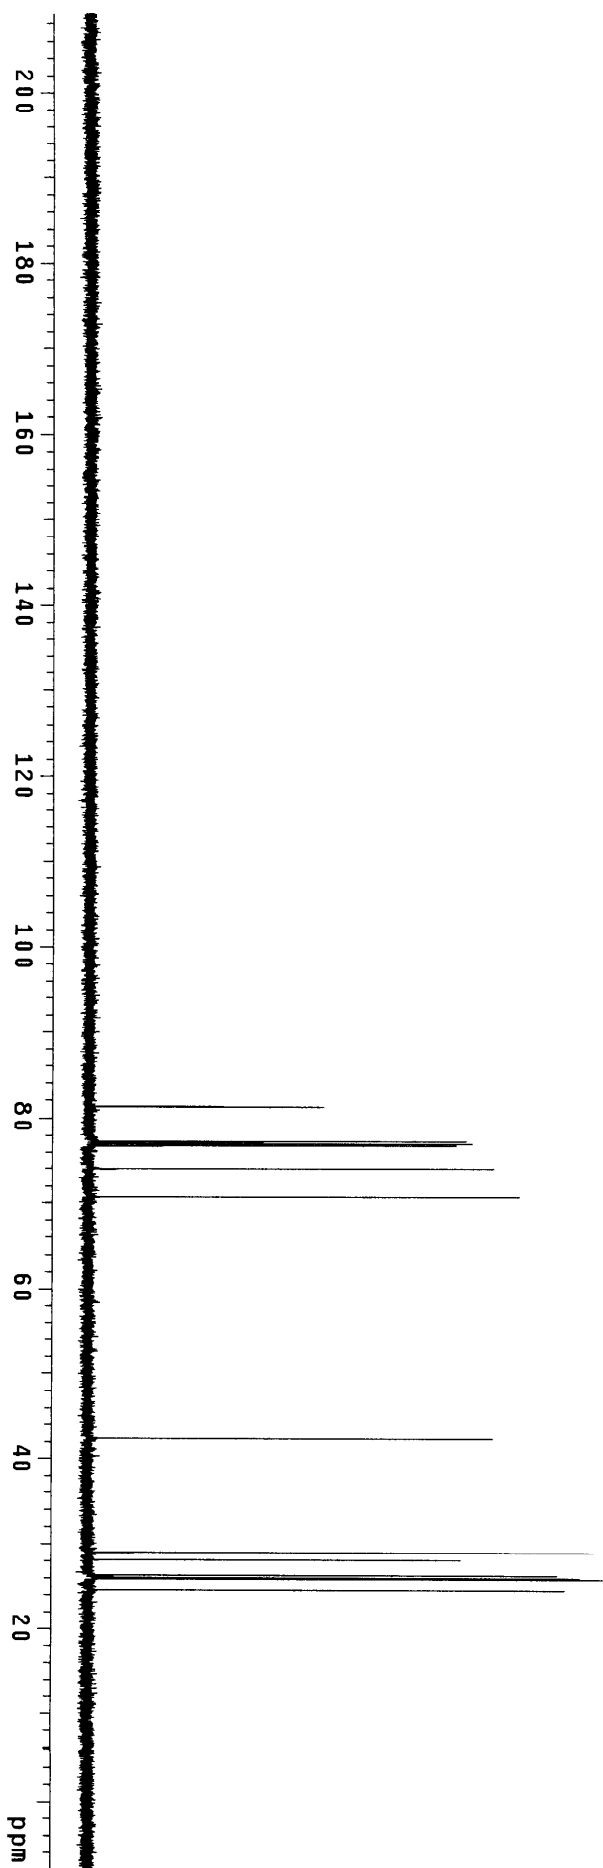



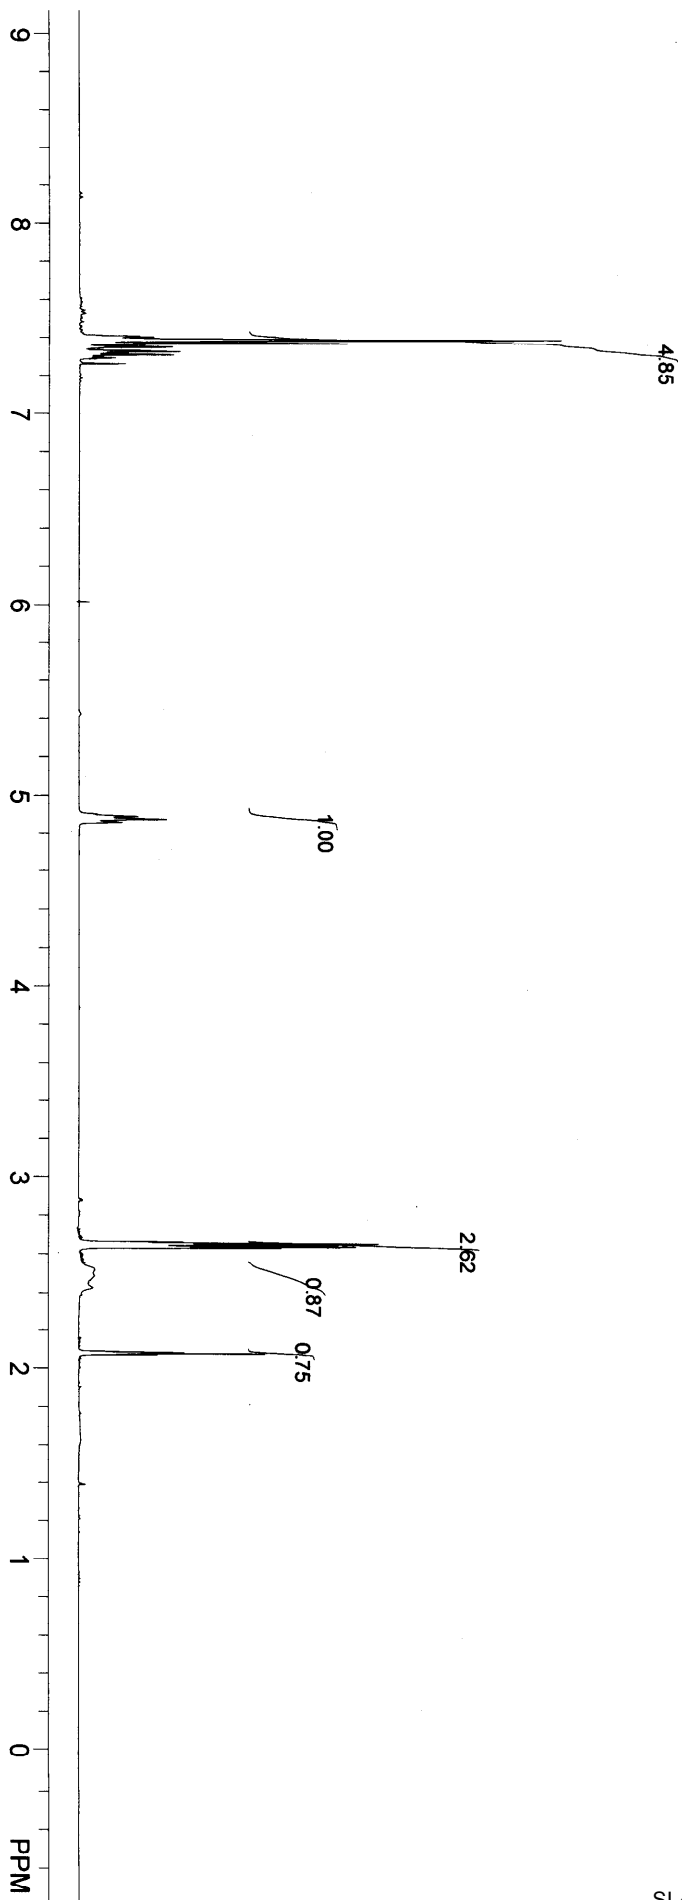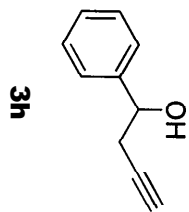

Y1W-3-154s-C

Data Collected on:  
nmr500-inova500  
Archive directory:  
/export/home/vnmr1/vnmrSYS/data  
Sample directory:

File: CARBON

Pulse Sequence: s2pu1

Solvent: cdcl3

Temp: 22.0 C / 295.1 K

Operator: lye

Relax. delay 3.000 sec

Pulse 58.7 degrees

Acq. time 1.300 sec

Width 40000.0 Hz

90 repetitions

OBSERVE C13, 125.6889884 MHz

DECUPLE H1, 499.8598575 MHz

Power 36 dB

on during acquisition

off during delay

WALTZ-16 modulated

DATA PROCESSING

Line broadening 0.5 Hz

FT size 131072

Total time 0 min

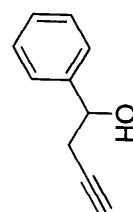**3h**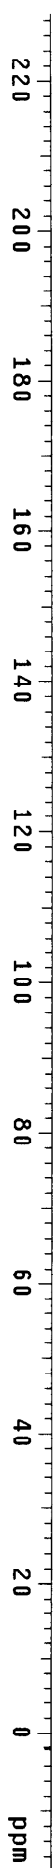

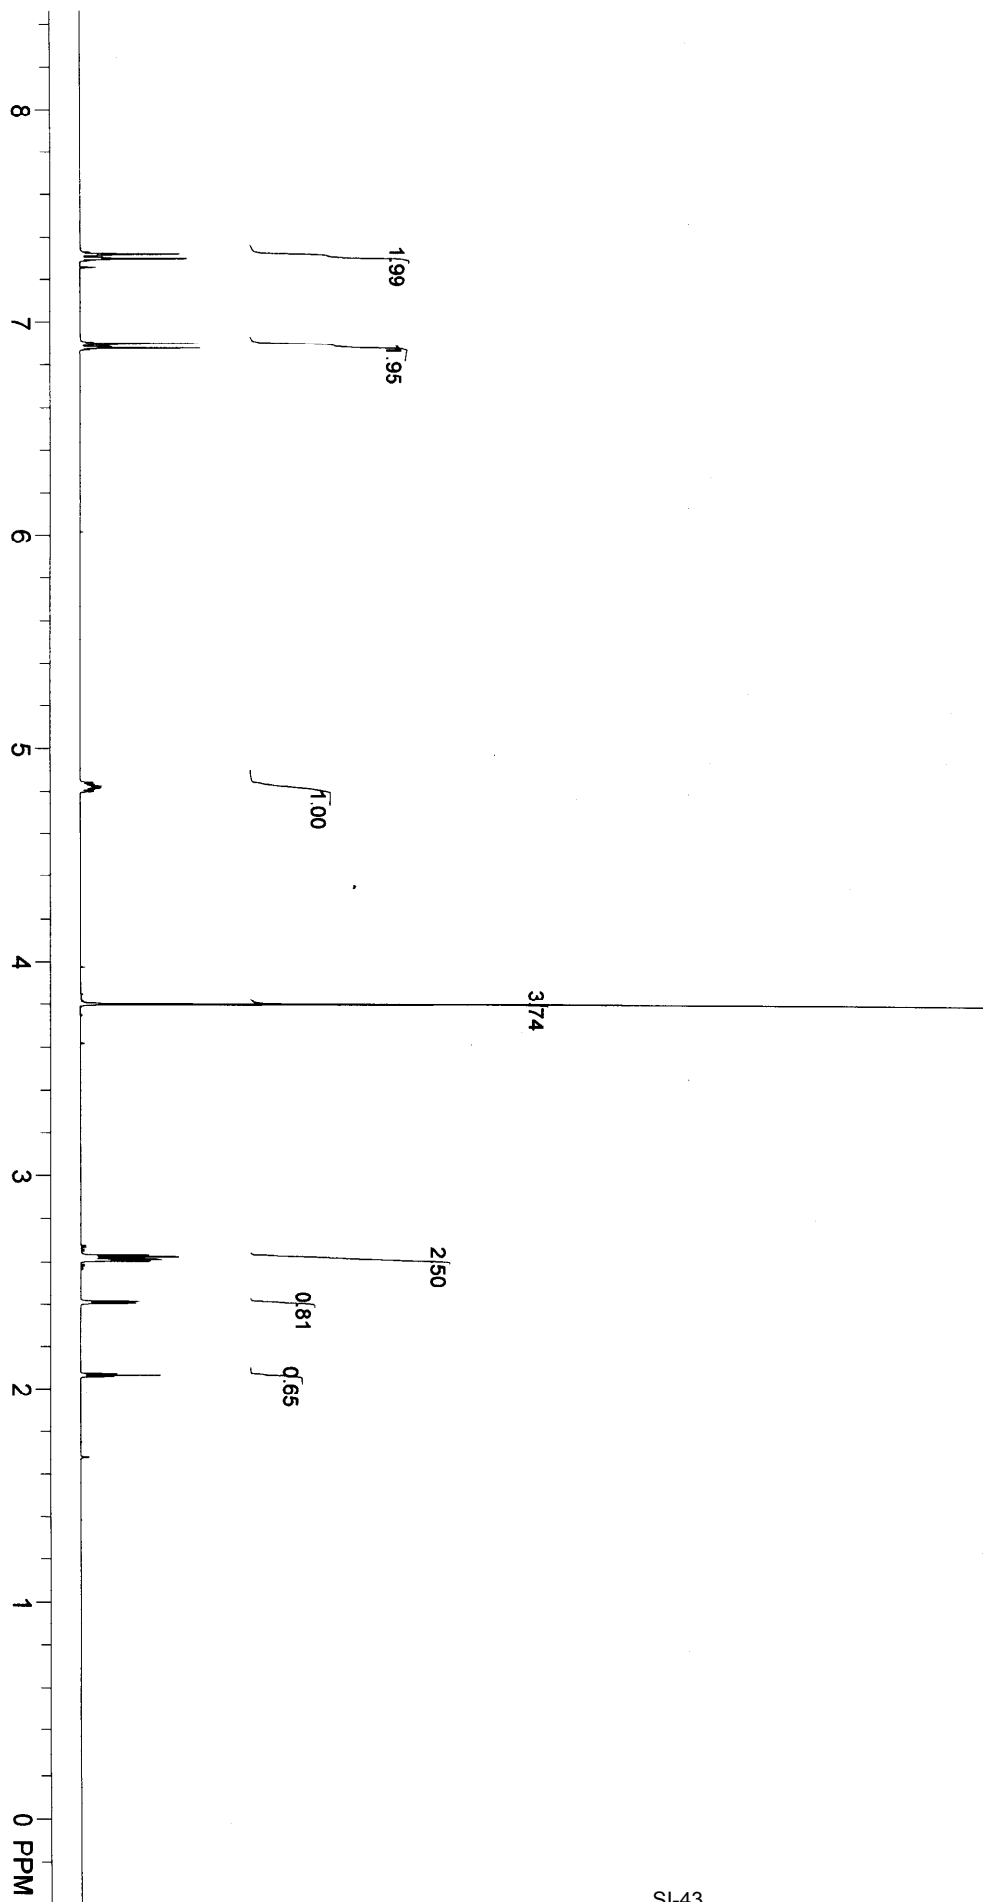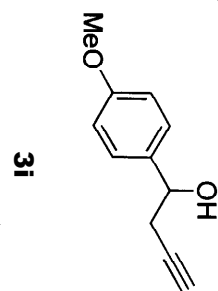

Y1W-3-155s--c

Data Collected on:  
nmr500-inova500  
Archive directory:  
/export/home/vnmr1/vnmrSYS/data  
Sample directory:

File: CARBON

Pulse Sequence: s2pul  
Solvent: cdcl3  
Temp. 22.0 C / 295.1 K  
Operator: lye

Relax. delay 3.000 sec  
Pulse 58.7 degrees  
Acq. time 1.300 sec  
Width 40000.0 Hz  
52 Repetitions  
OBSERVE C13, 125.6889884 MHz  
DECUPLE H1, 499.858575 MHz  
Power 36 db  
on during acquisition  
off during delay  
WALTZ-16 modulated  
DATA PROCESSING  
Line broadening 0.5 Hz  
FT size 131072  
Total time 0 min

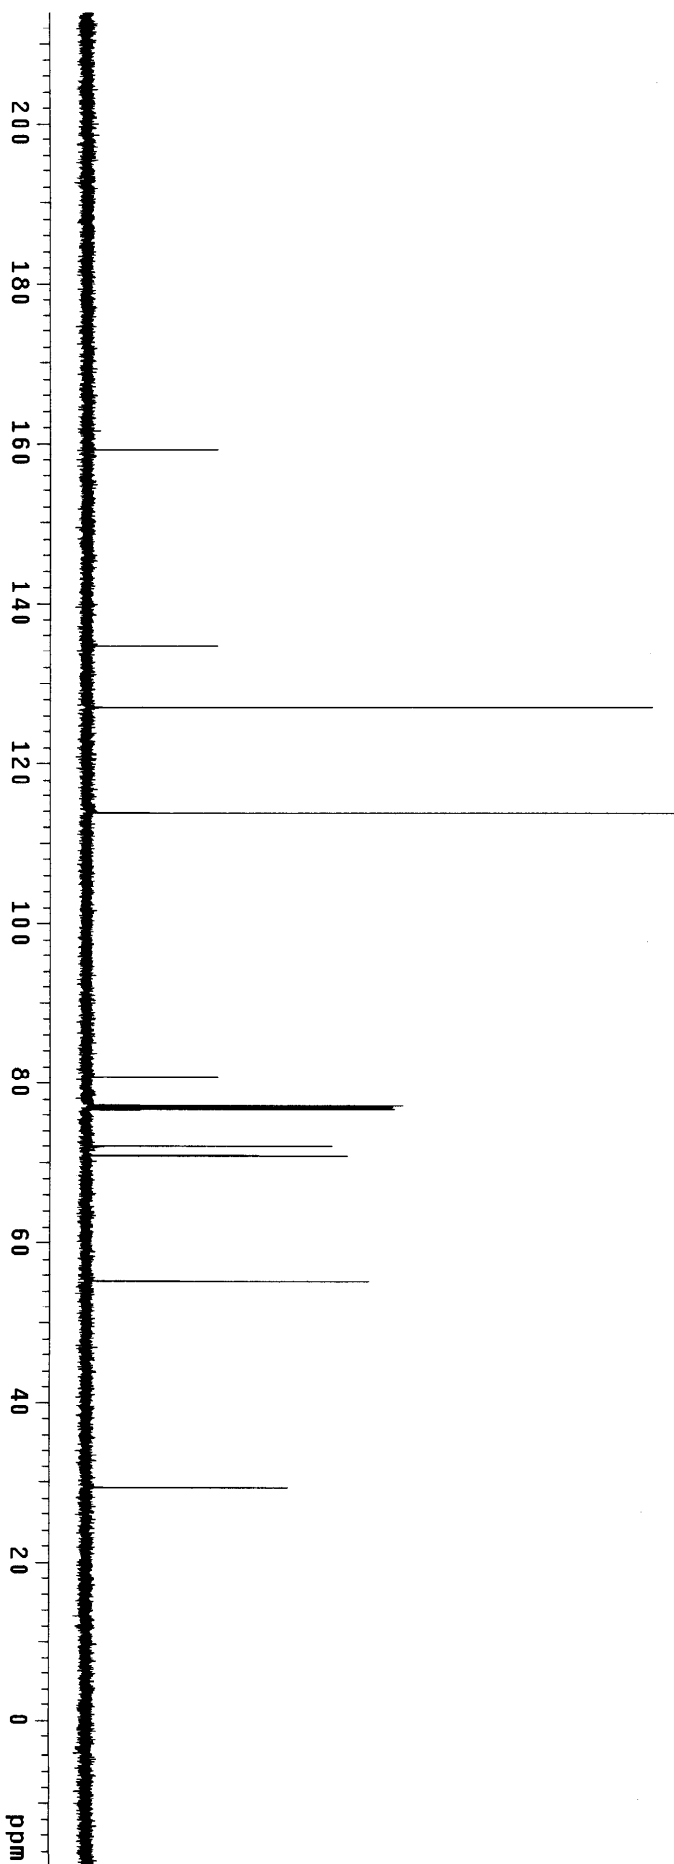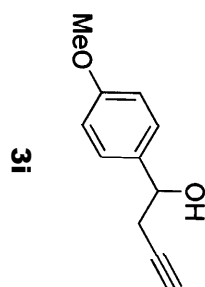

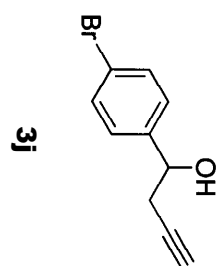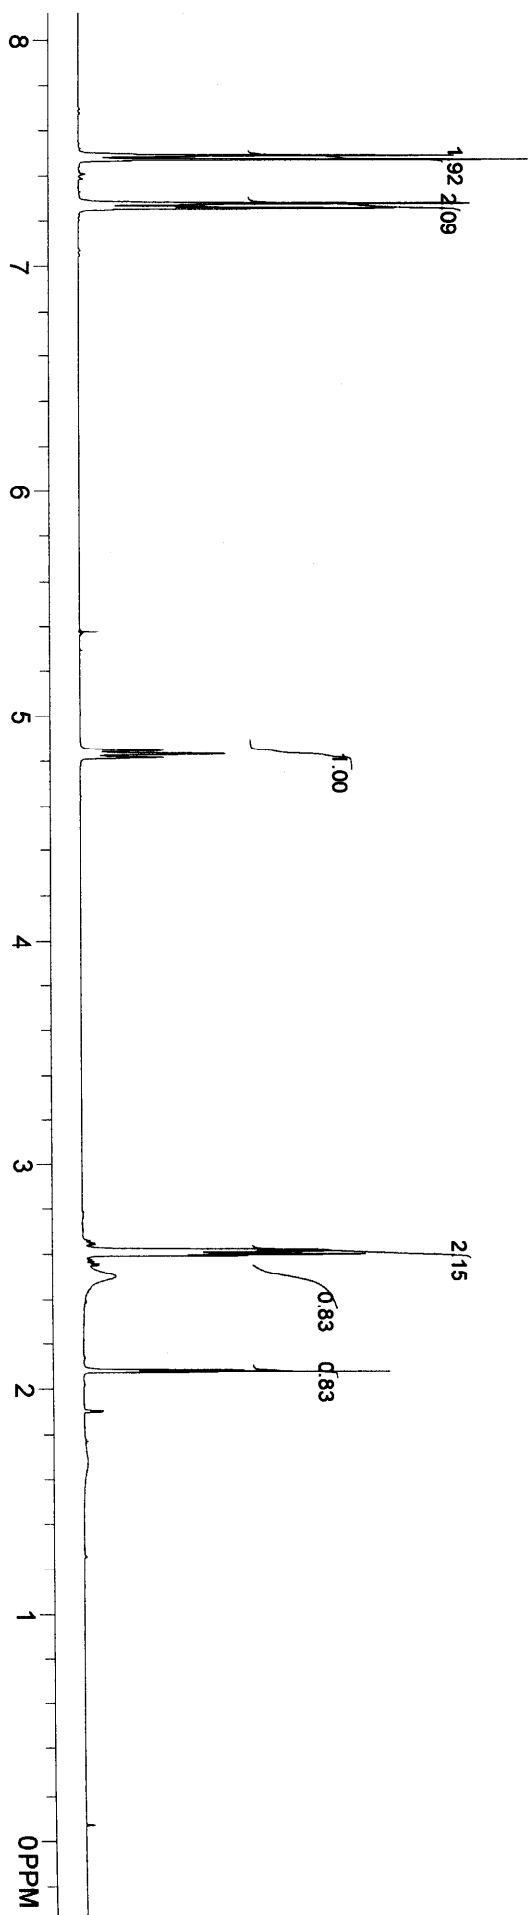

Y1W-3-153-s

Data Collected on:  
nmr500-inova500  
Archive directory:  
/export/home/vnmr1/vnmrsys/data  
Sample directory:

File: CARBON

Pulse Sequence: s2pu1

Solvent: cdcl3

Temp: 22.0 C / 295.1 K

Operator: tye

Relax. delay 3.000 sec

Pulse: 58.7 degrees

Acq. time 1.500 sec

Width 40000.0 Hz

50 repetitions

OBSERVE C13, 125.6889878 MHz

DECUPLE H1, 499.8588575 MHz

Power 36 db

on during acquisition

off during delay

WALTZ-16 modulated

DATA PROCESSING

Line broadening 0.5 Hz

FT size 131072

Total time 0 min

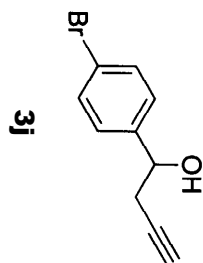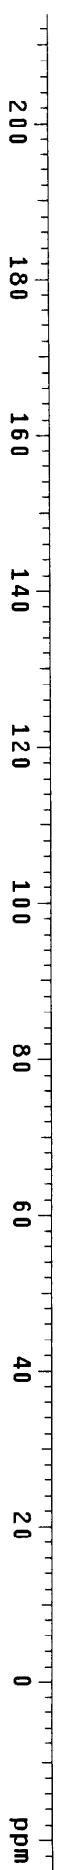

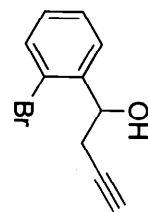

**3k**

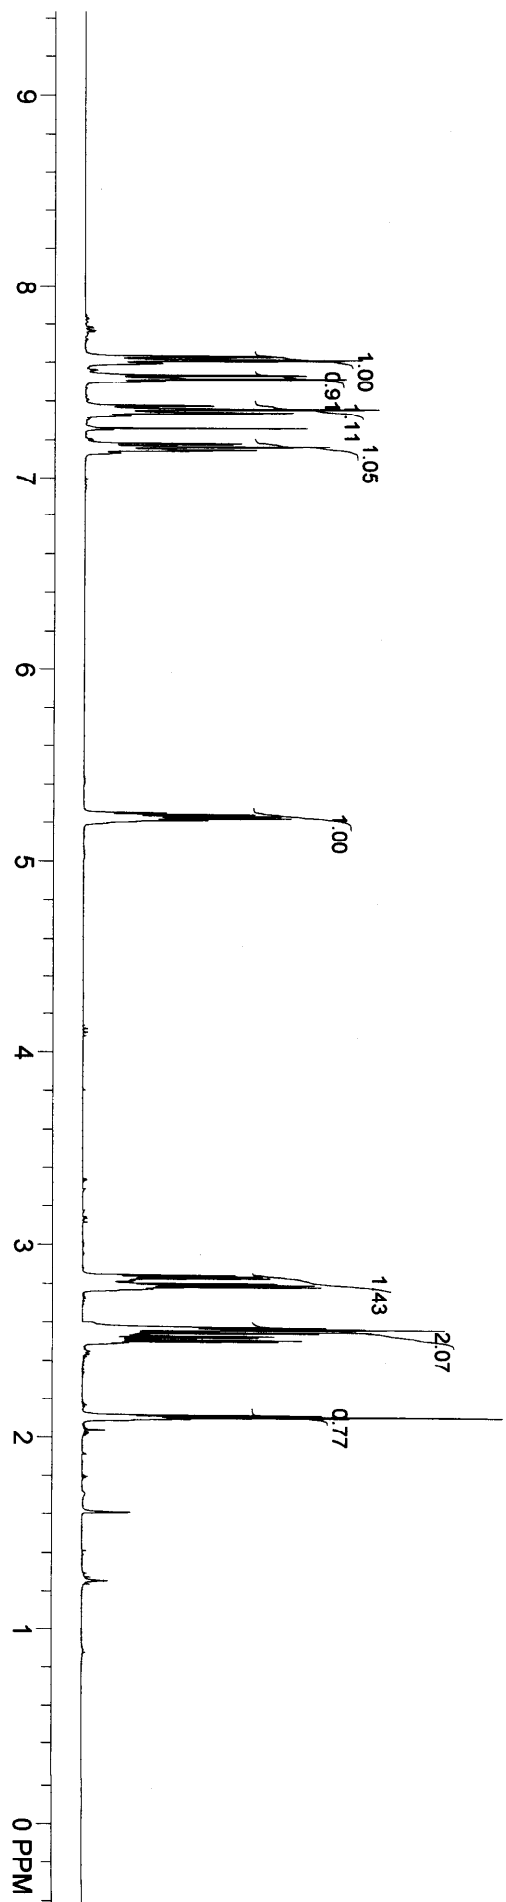

y1w-3-165s-c

Data Collected on:  
 nmr500-inova500  
 Archive directory:  
 /export/home/vmmr1/vmmrSYS/data  
 Sample directory:

File: CARBON

Pulse Sequence: s2pu1  
 Solvent: cdcl3

Temp: 22.0 C / 295.1 K  
 Operator: lye

Relax. delay 3.000 sec  
 Pulse 58.7 degrees

Acq. time 1.300 sec  
 Width 40000.0 Hz

70 Repetitions  
 OBSERVE C13, 125.6889872 MHz

DECOUPLE H1, 499.8588575 MHz  
 Power 36 db

on during acquisition  
 off during delay

DATA PROCESSING  
 Line broadening 0.5 Hz  
 FT size 131072

Total time 0 min

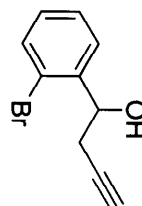

**3k**

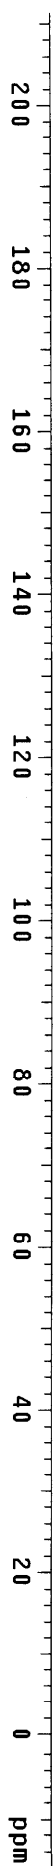



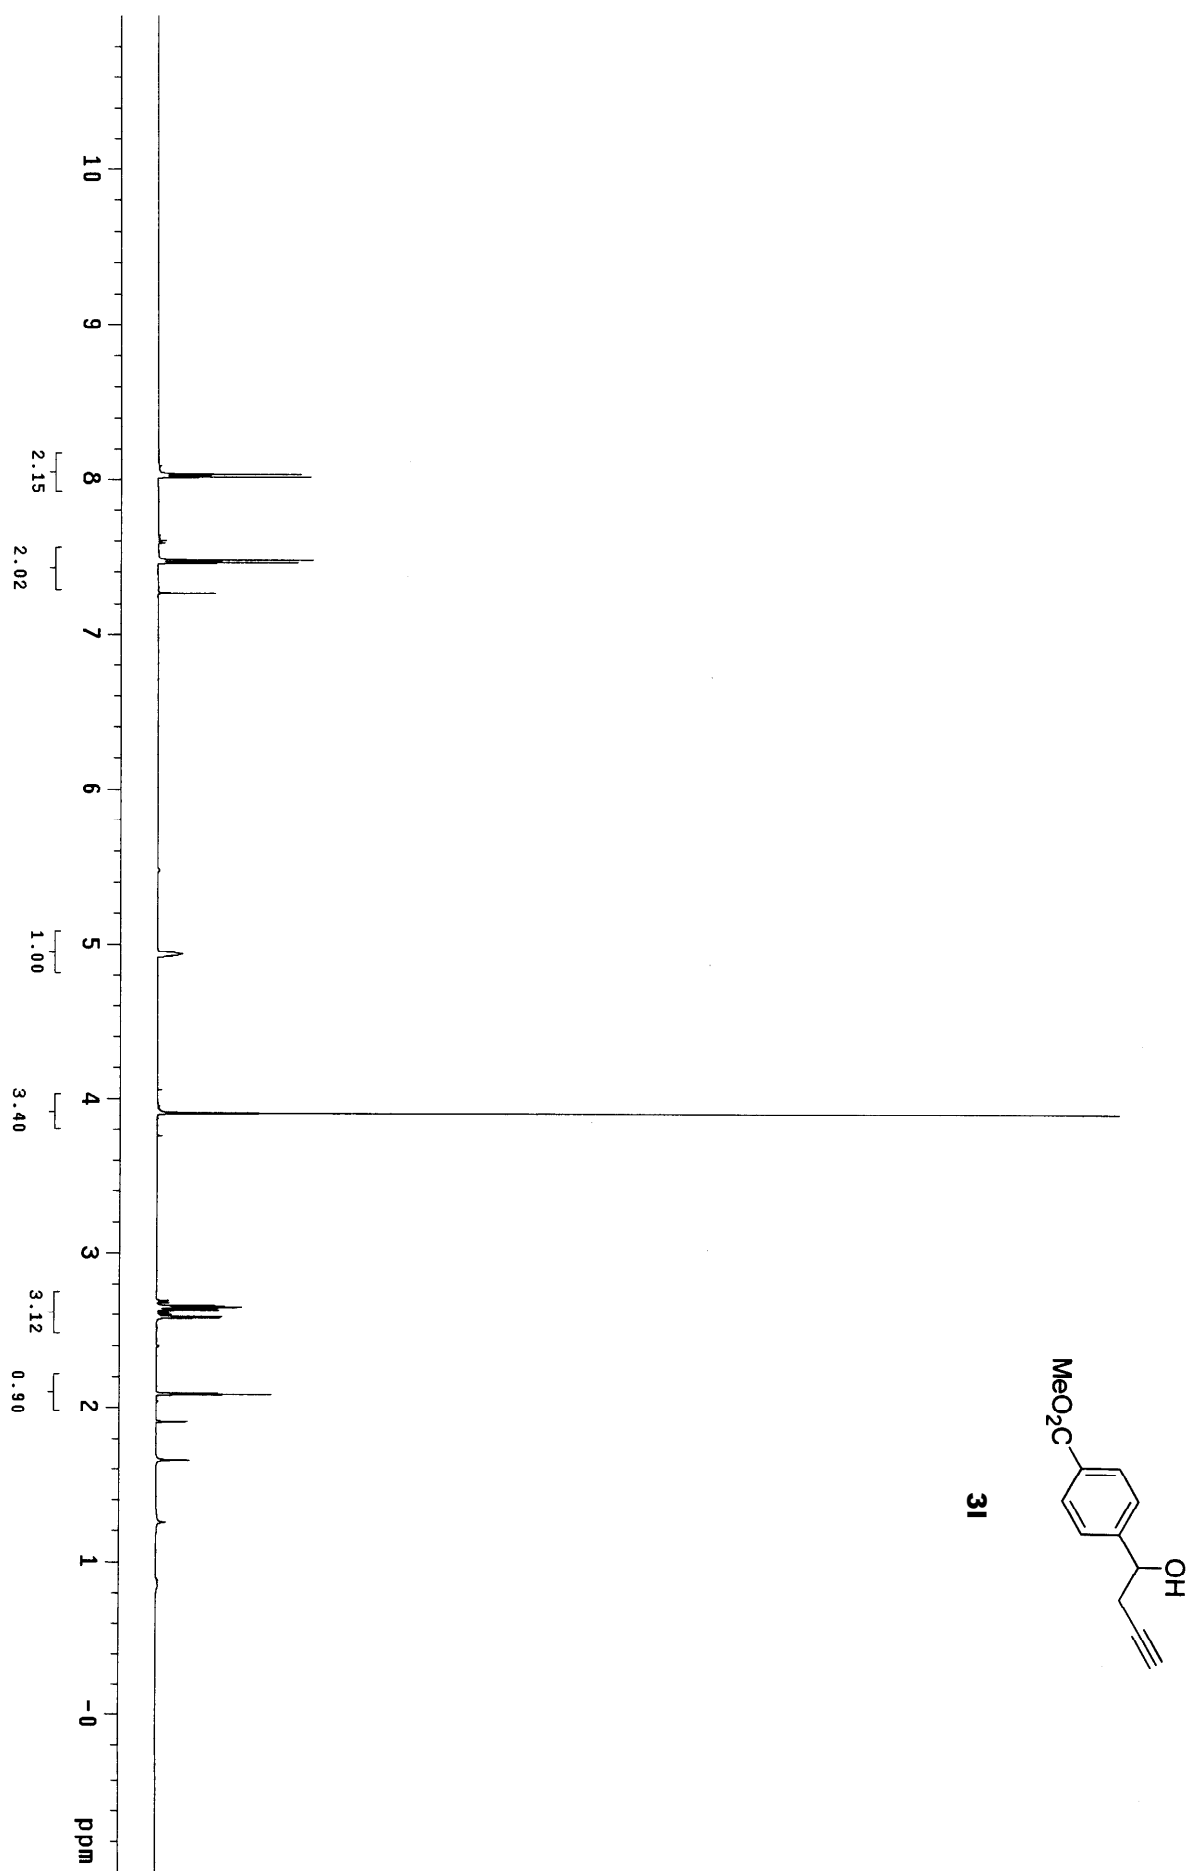

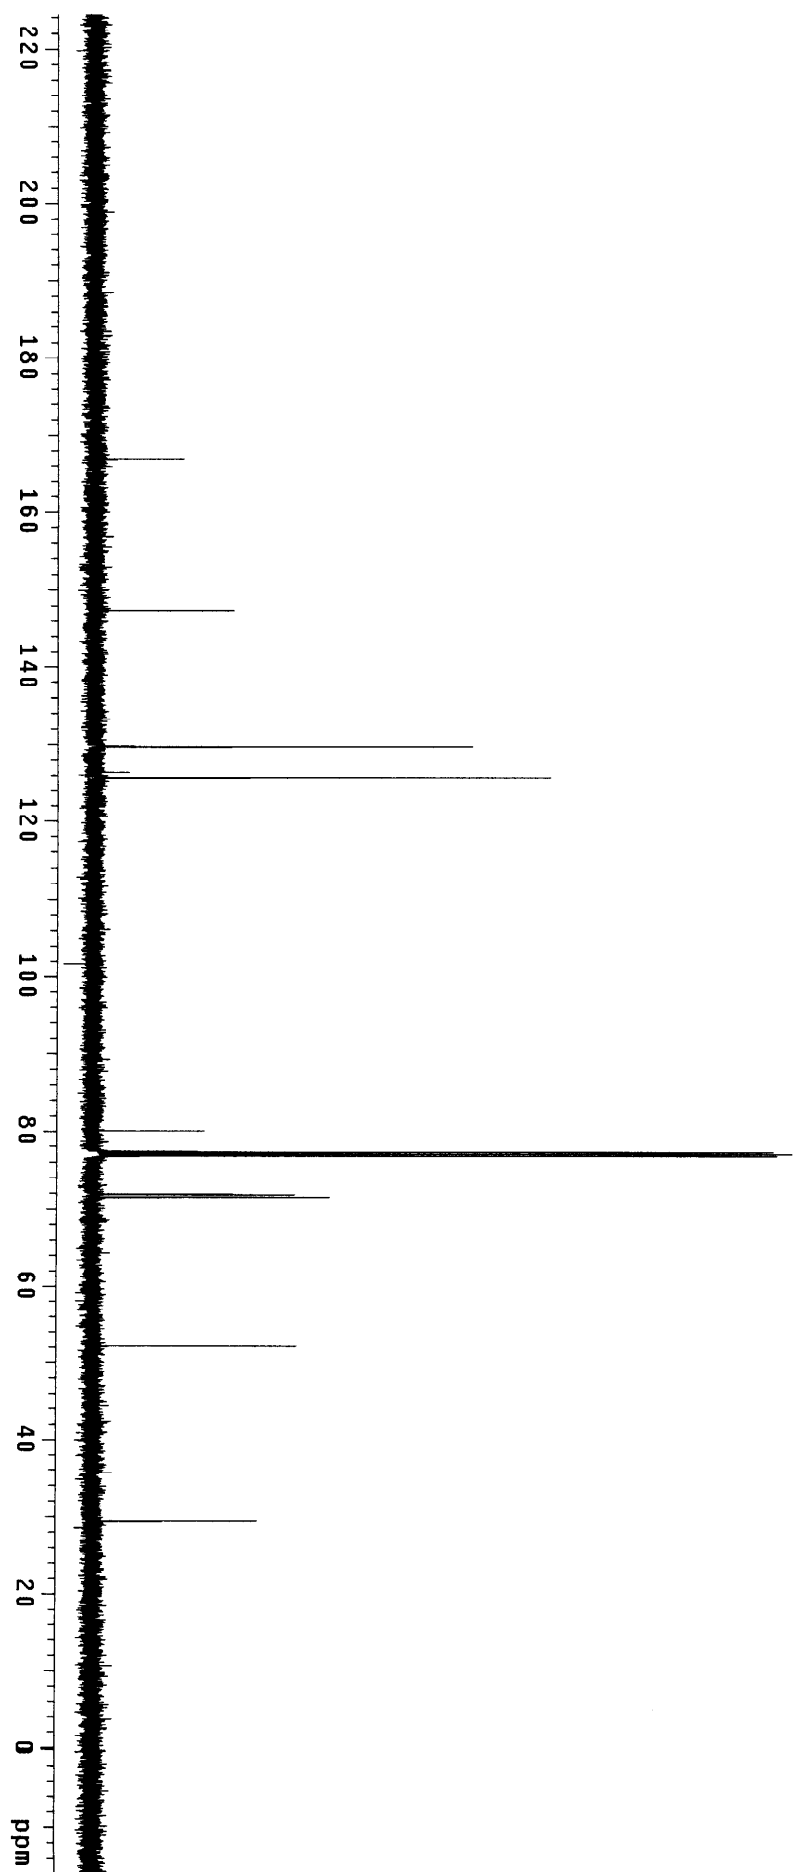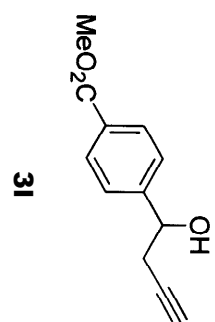

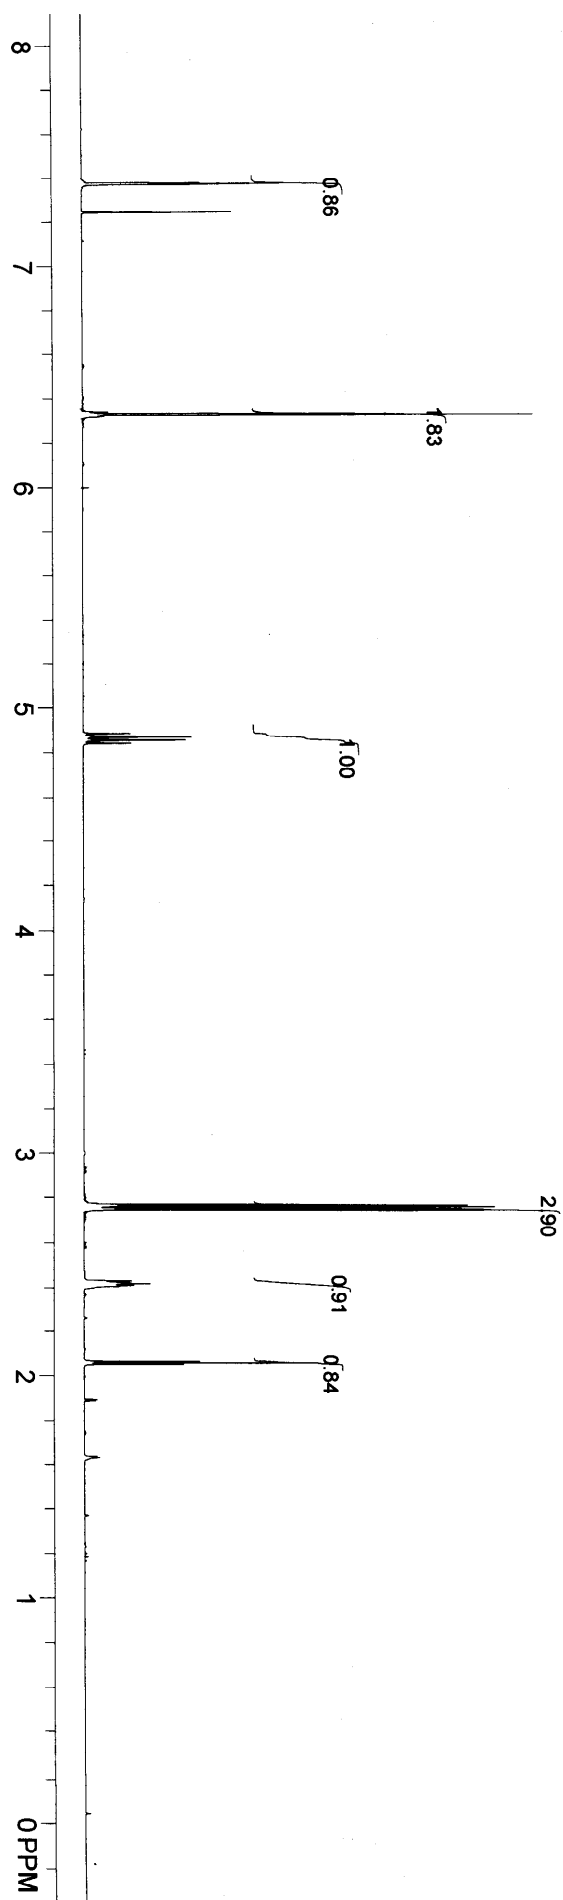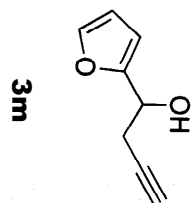

Y1W-3-166-c

Data Collected on:  
nmr500-inova500  
Archive directory:  
/export/home/vnmr1/vnmrSYS/data  
Sample directory:

File: CARBON

Pulse Sequence: s2pul1  
Solvent: cdcl3  
Temp: 22.0 C / 295.1 K  
Operator: lye

Relax. delay 3.000 sec  
Pulse 58.7 degrees  
Acq. time 1.300 sec  
Width 40000.0 Hz  
54 Repetitions  
OBSERVE C13, 125.6889860 MHz  
DECUPLE H1, 499.8588575 MHz  
Power 36 db  
on during acquisition  
off during delay  
WALTZ-16 modulated  
DATA PROCESSING  
Line broadening 0.5 Hz  
FT size 131072  
Total time 0 min

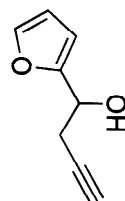**3m**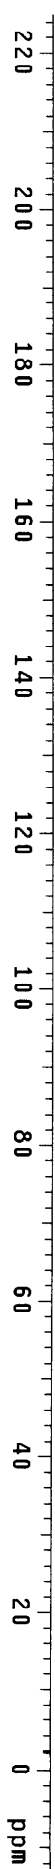

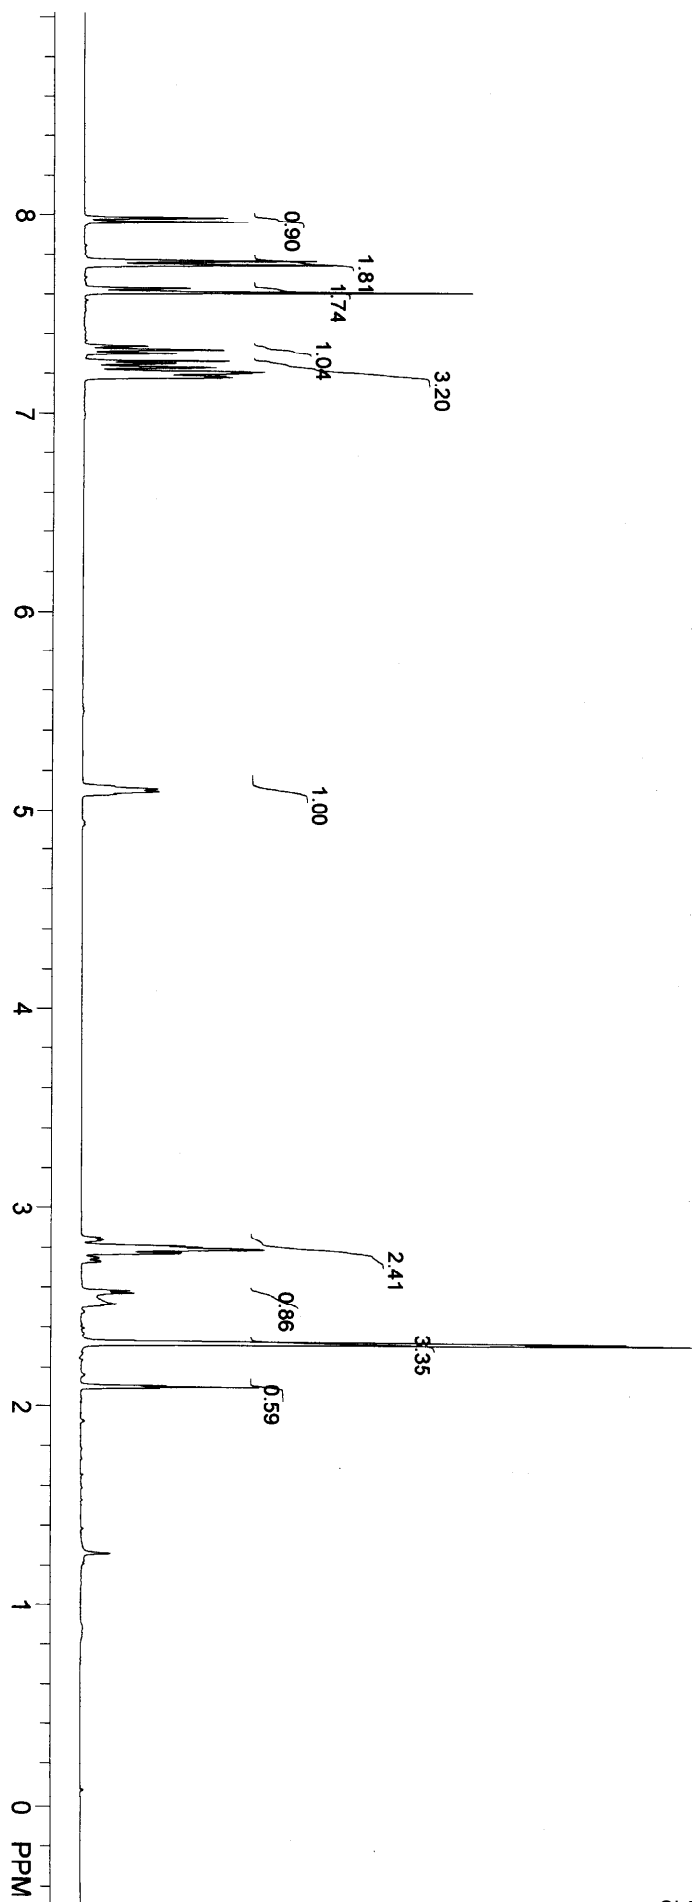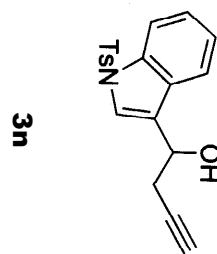

y1w-3-180-c

Data Collected on:  
nmr500-inova500  
Archive directory:  
/export/home/vnmr1/vnmrSYS/data  
Sample directory:

File: CARBON

Pulse Sequence: szpul  
Solvent: cdcl3  
Temp. 22.0 C / 295.1 K  
Operator: lye

Relax. delay 3.000 sec  
Pulse 58.7 degrees  
Acq. time 1.380 sec  
Width 40000.0 Hz  
100 repetitions  
OBSERVE C13, 125.688902 MHz  
DECUPLE H1, 499.8588575 MHz  
Power 36 db  
on during acquisition  
off during delay  
WALTZ-16 modulated  
DATA PROCESSING  
Line broadening 0.5 Hz  
FT size 131072  
Total time 0 min

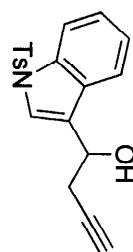**3n**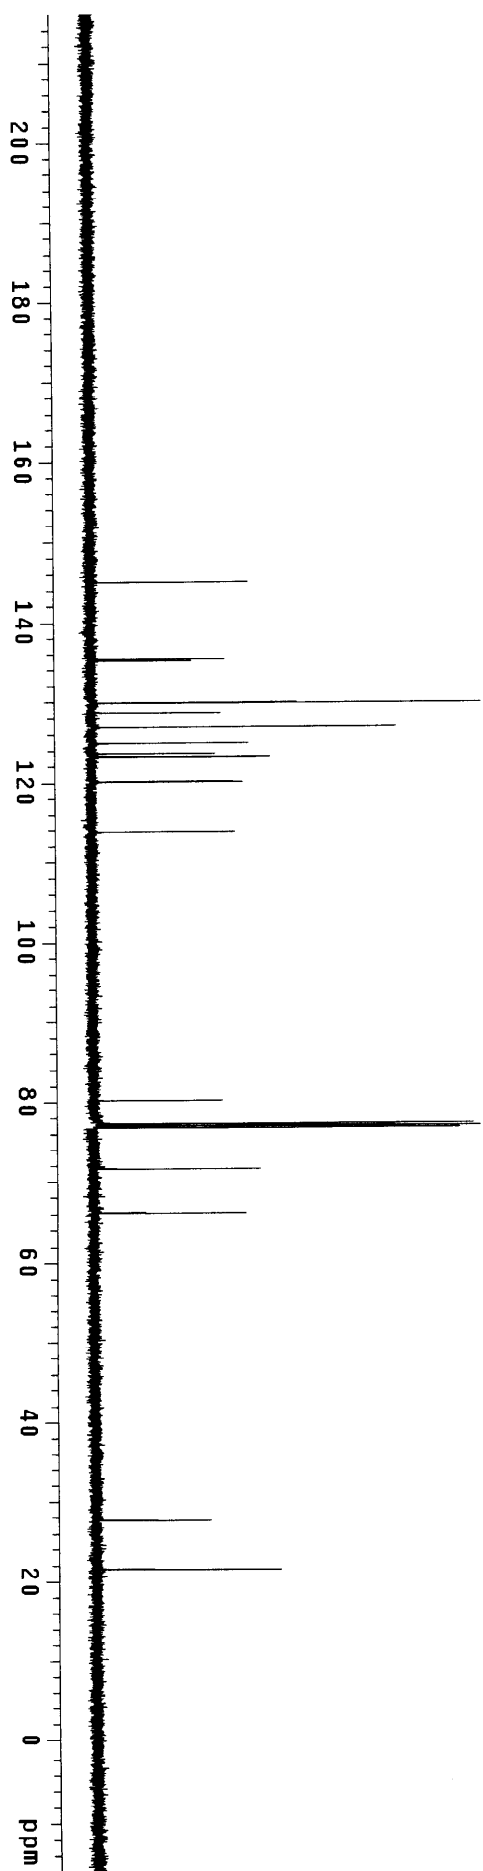

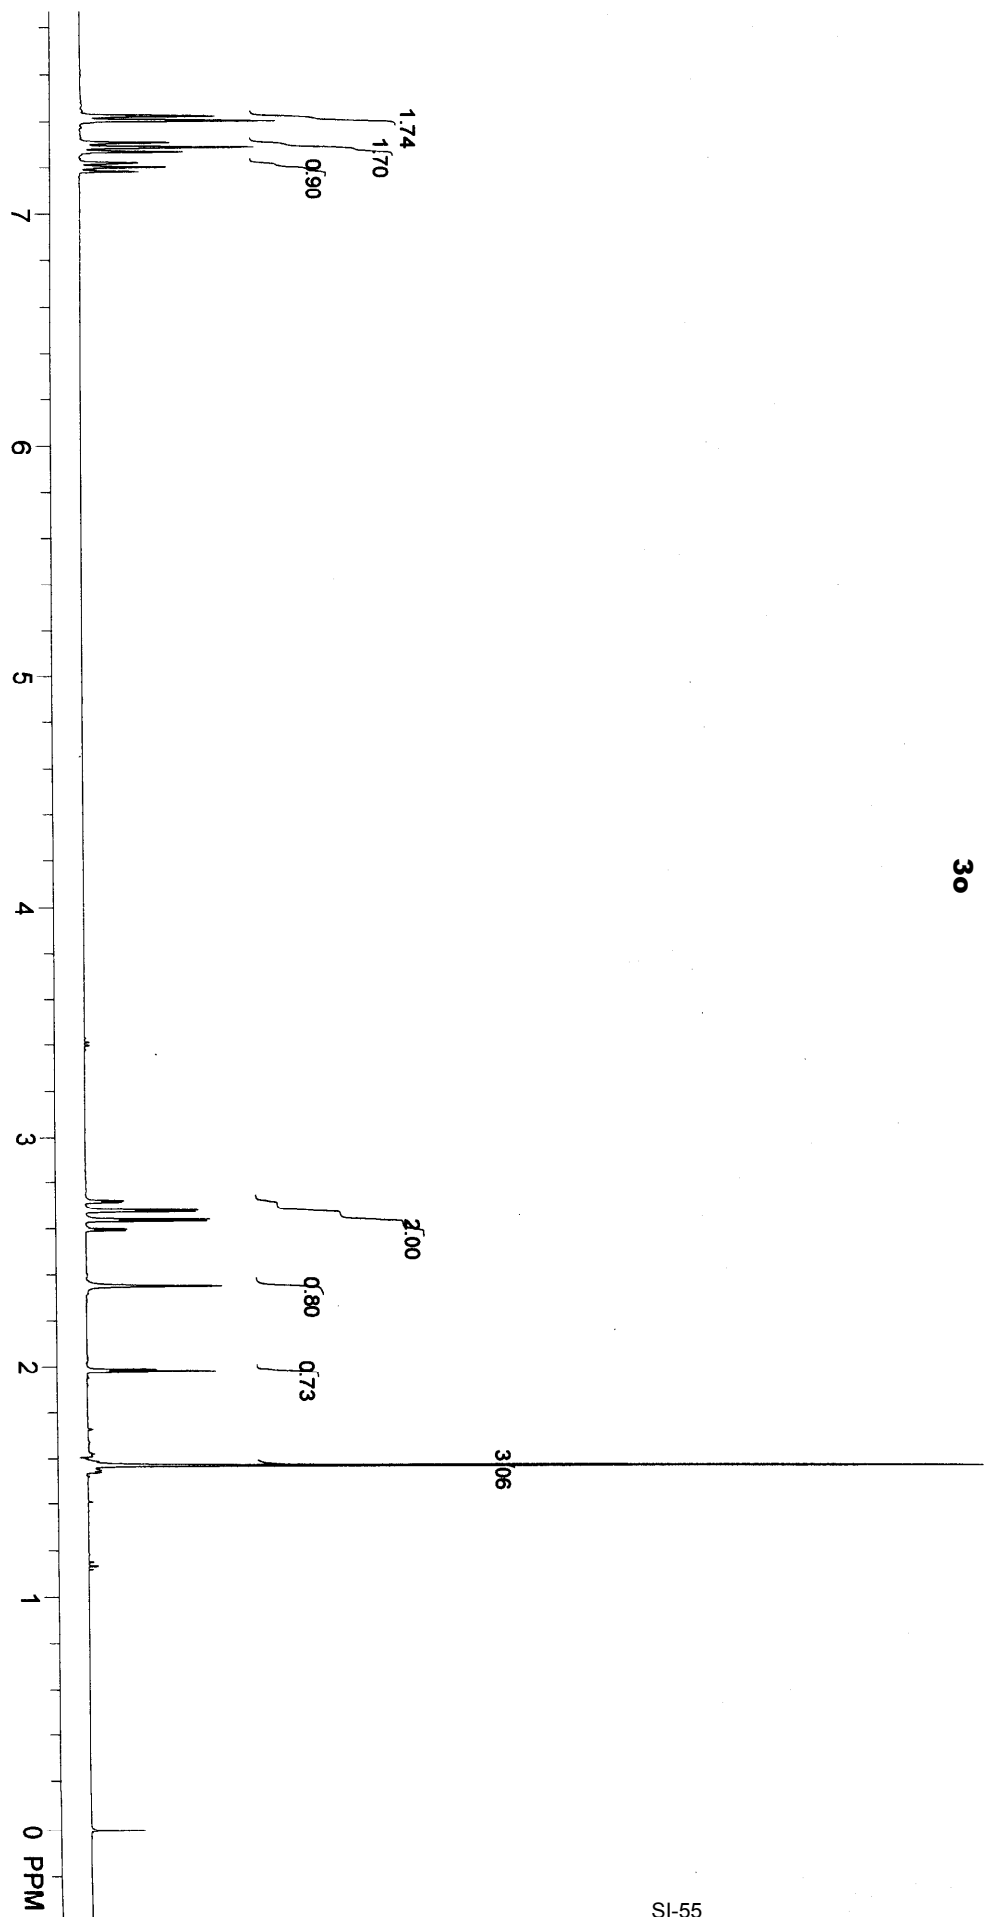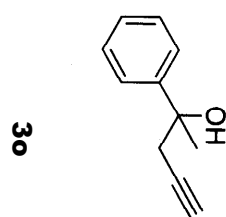

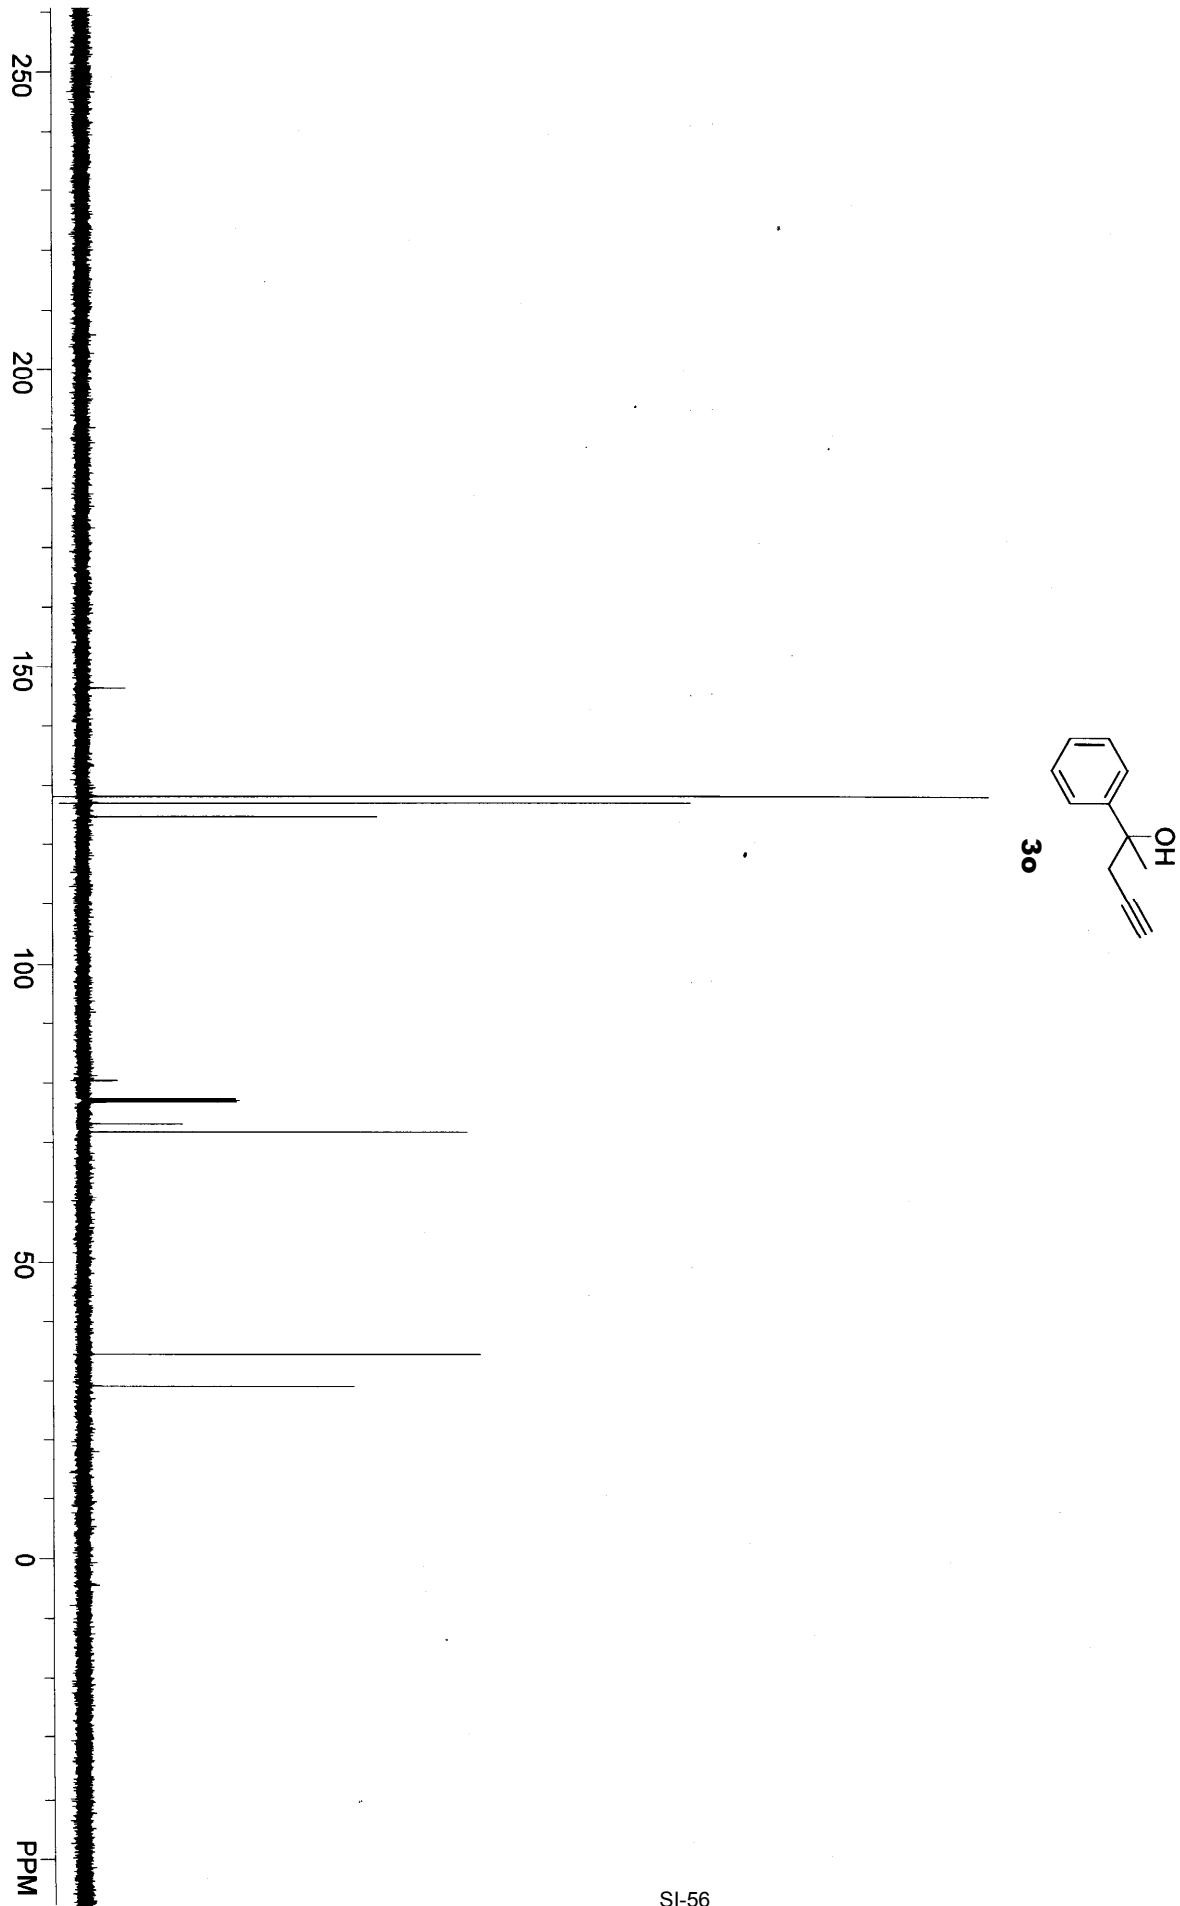



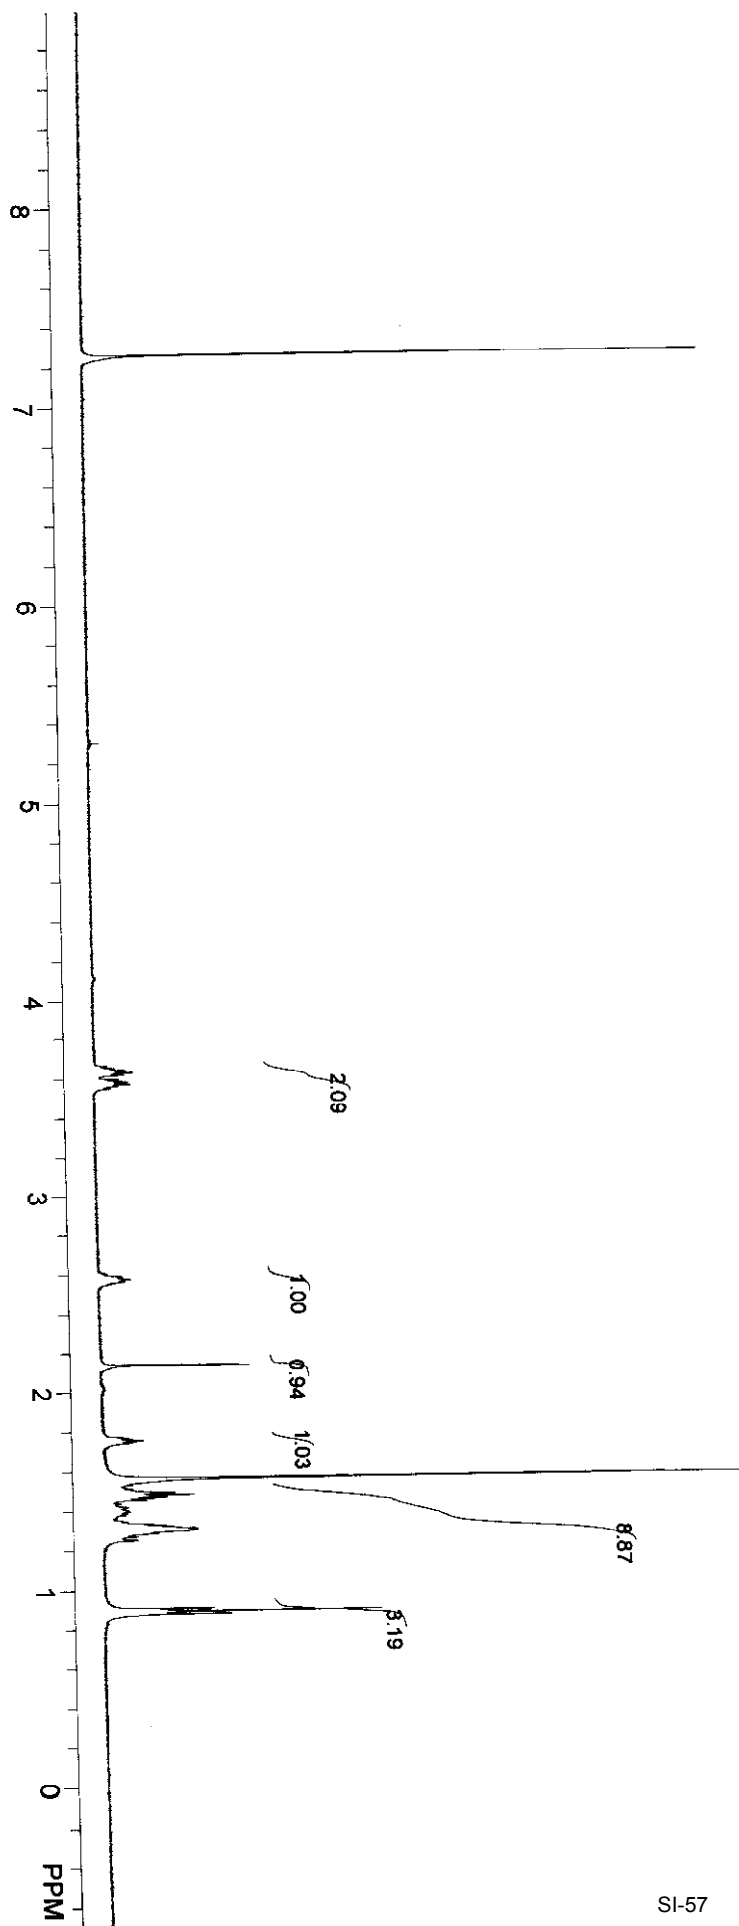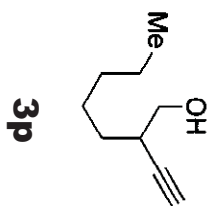

STANDARD CARBON PARAMETERS

```

exp1 CARBON
SAMPLE
date Jan 2 2010 temp 22.0
solvent cdc13 gain 54
file /home/Zhang/g~ spin 20
uzhang/C13-2009122~ hst 0.008
3-5.fid pw90 9.200
ACQUISITION atfa 10.000
40000.0
sw 1.300 i1
at 104036 in
np 22000 dp
fb 4 hs
bs d1 3.000 1b PROCESSING 0.50
nt 12000 92 fn 1sfid 2
ct TRANSMITTER C13 not used
tn 125.702 SP DISPLAY -1705.6
sftq 865.4 WP 20025.6
tof 56 FT1 15903.1
tpwr 6.000 rfp 9578.1
pw DECOUPLER H1 1p 115.1
-983.5
dn dof 0 WC PLOT 250
dm mny 36 SC 0
decwave 36 VS 6524
dpwr 11101 th 11
dmf ai cdc ph
    
```

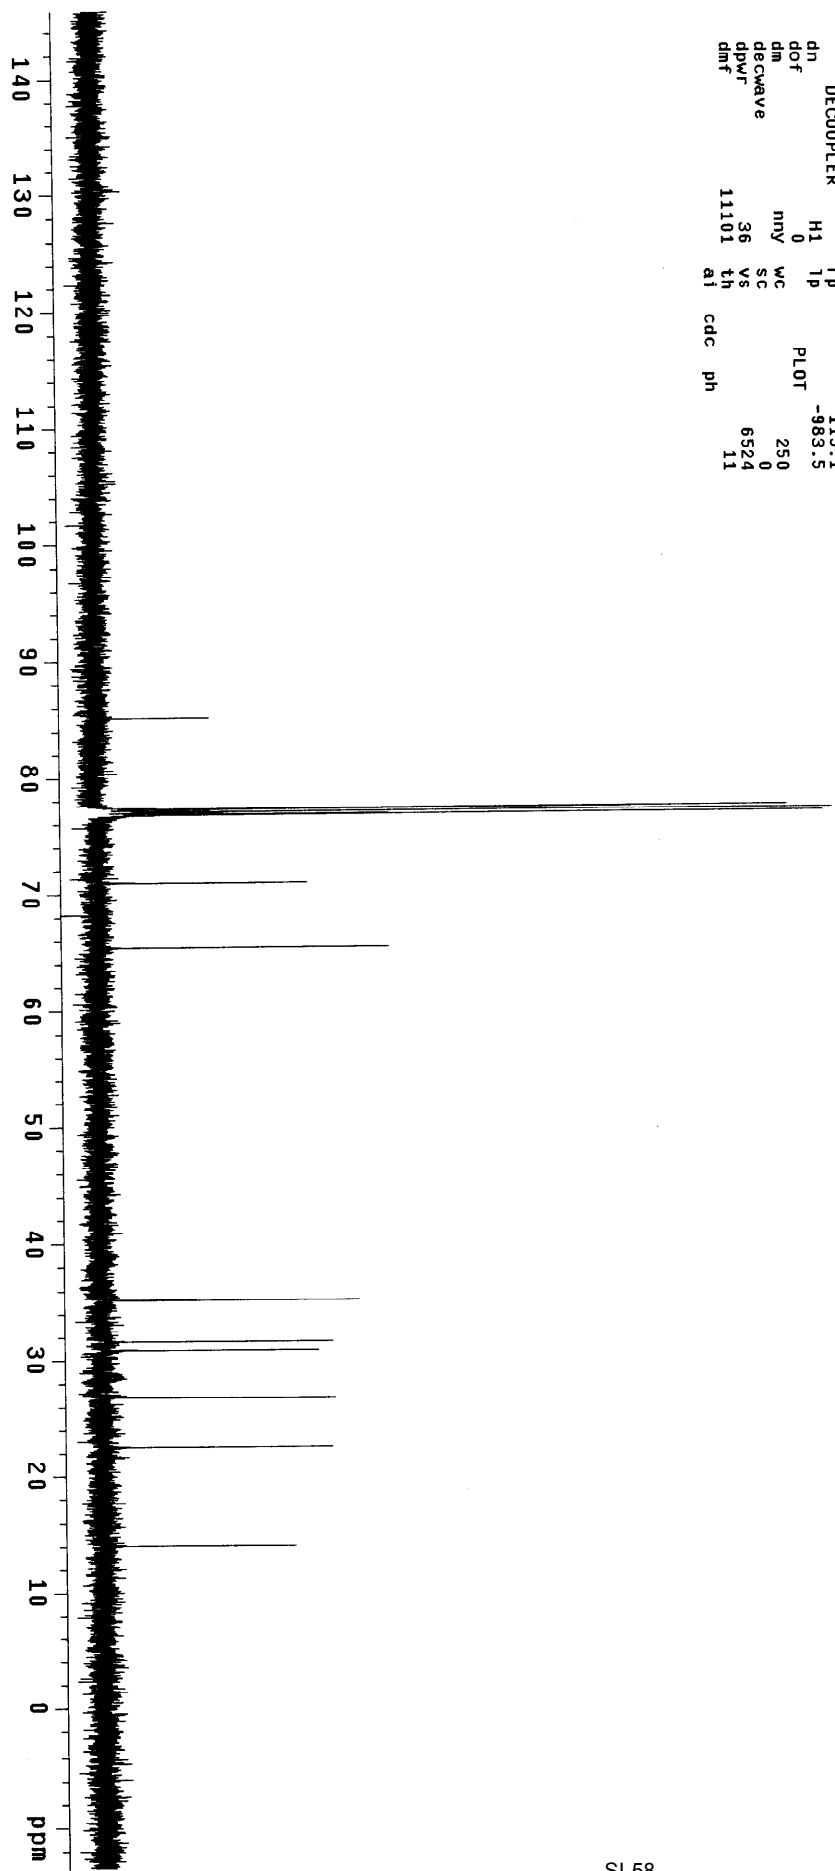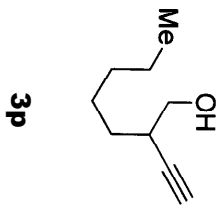

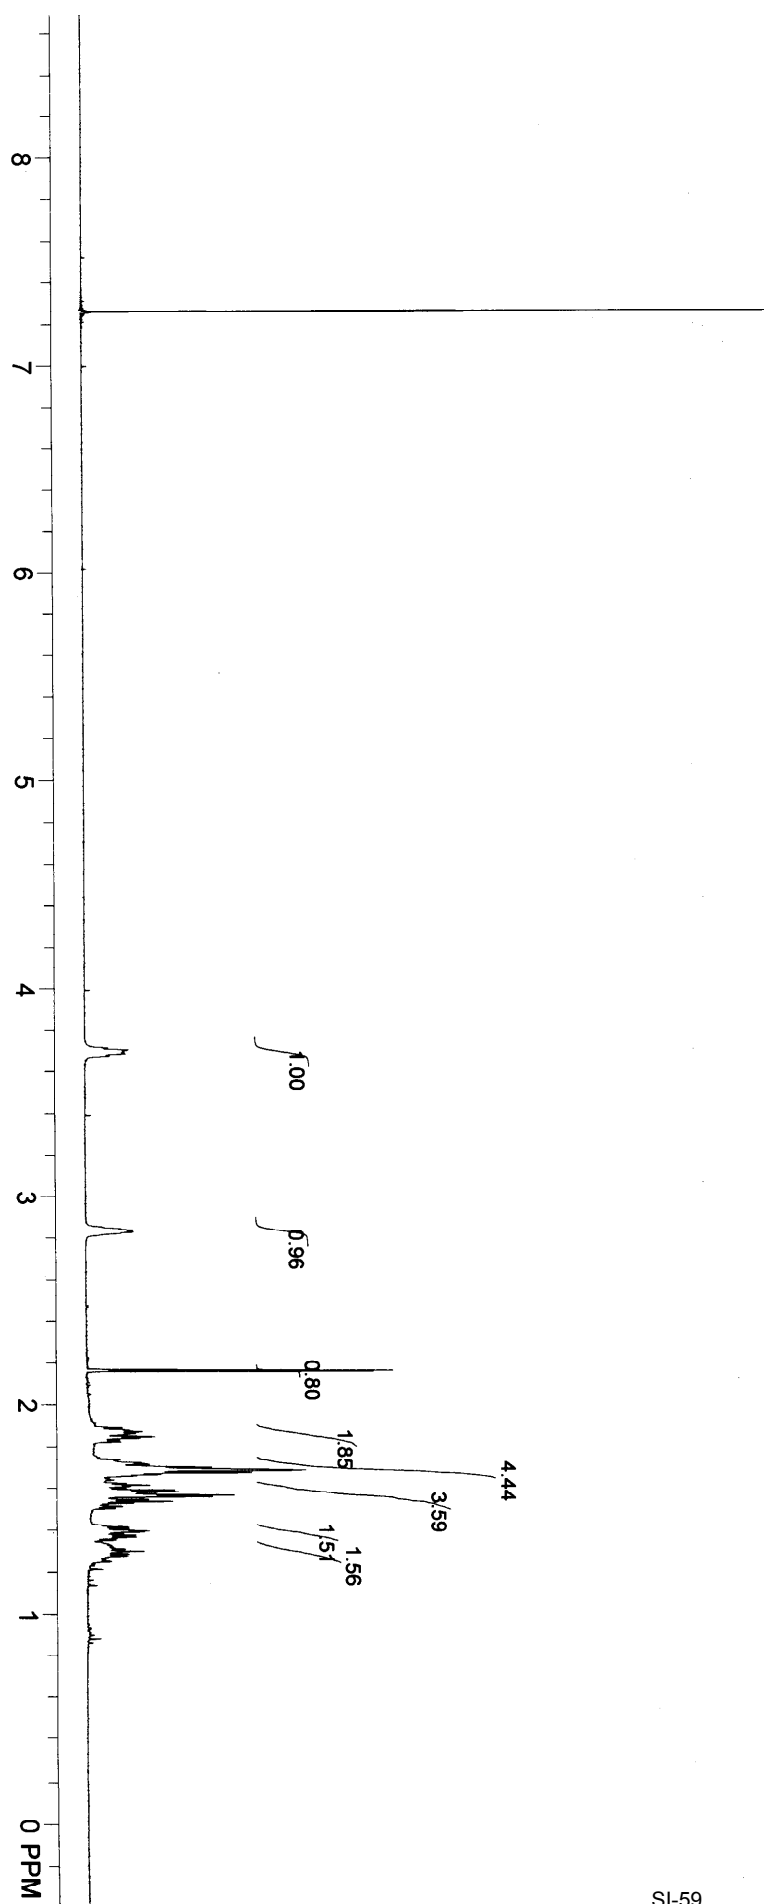**3q**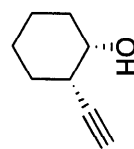

y1w-3-174-c

Data Collected on:  
nmr500-1nov0500  
Archive directory:  
/export/home/vmmr1/vmmr1/sys/data  
Sample directory:

File: CARBON

Pulse Sequence: s2pul1

Solvent: cdcl3

Temp. 22.0 C / 295.1 K

Operator: lye

Relax. delay 3.000 sec

Pulse 58.7 degrees

Acq. time 1.300 sec

Width 4000.0 Hz

106 repetitions

OBSERVE G13, 125.6889872 MHz

DECOUPLE H1, 499.8588575 MHz

Power 36 db

on during acquisition

off during delay

WALTZ-16 modulated

DATA PROCESSING

Line broadening 0.5 Hz

FT size 131072

Total time 0 min

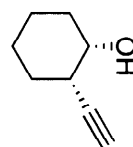**3q**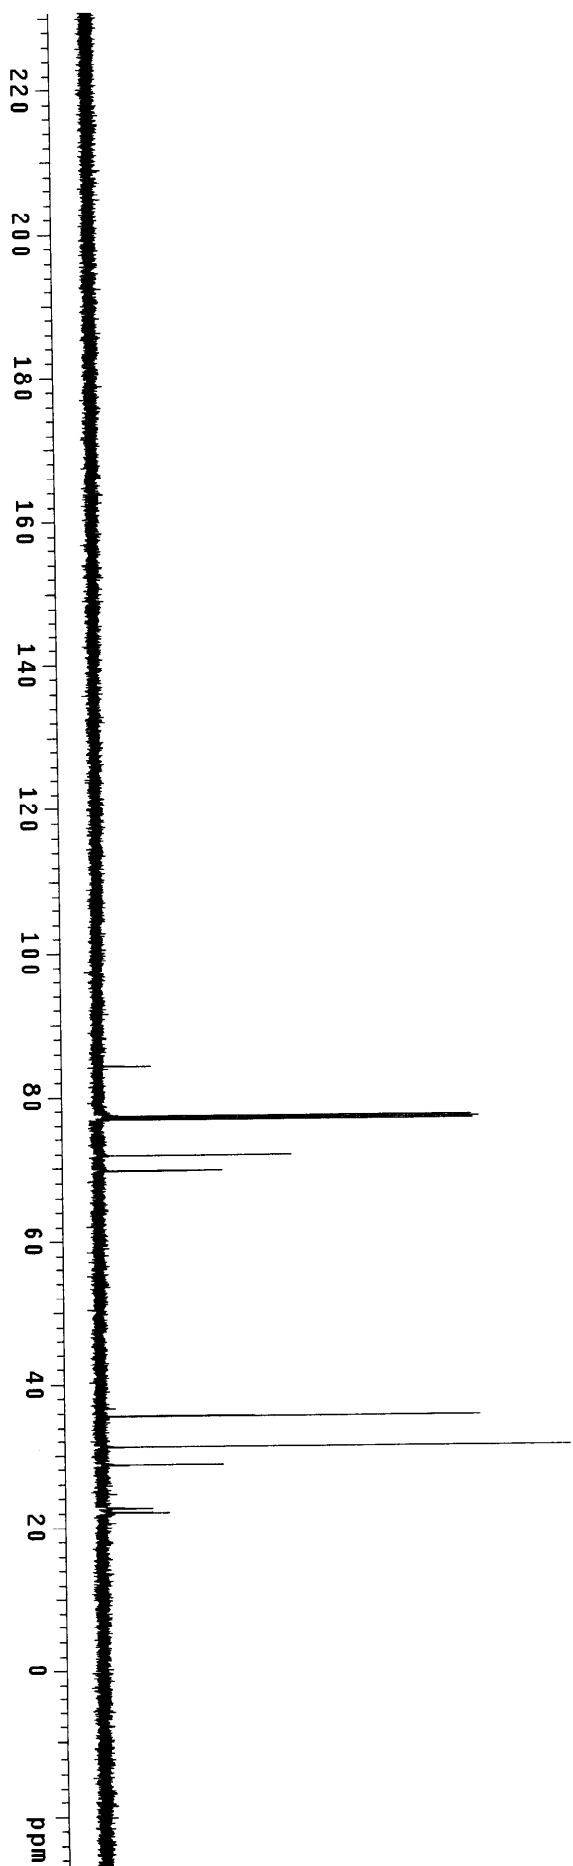

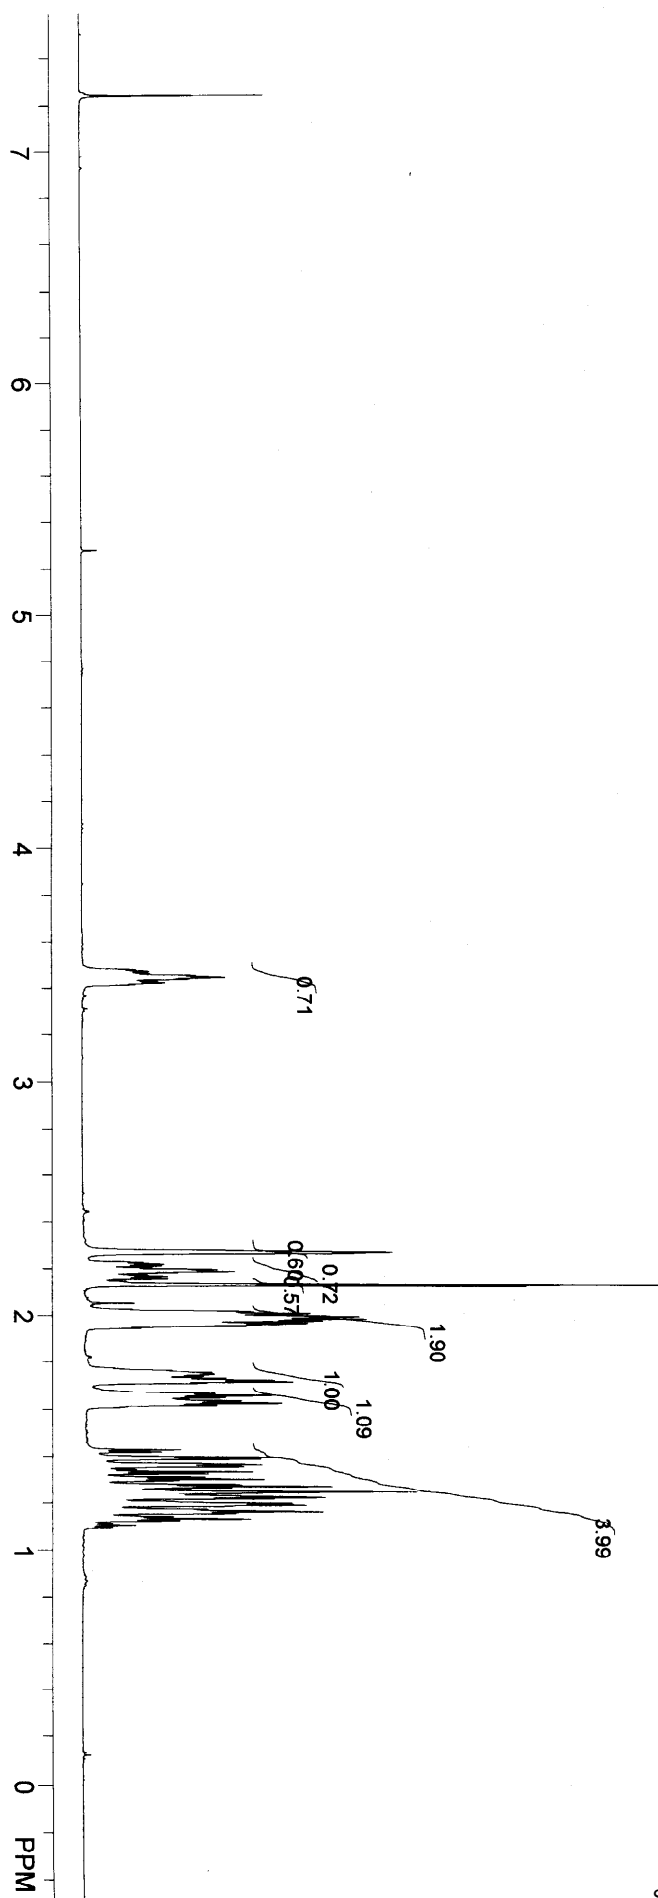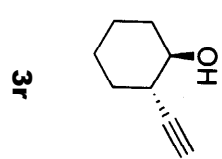

YJw-3-162-c

Data Collected on:  
 nmr500-inova500  
 Archive directory:  
 /export/home/vnmr1/vnmrSYS/data  
 Sample directory:

File: CARBON

Pulse Sequence: s2pu1  
 Solvent: cdcl3

Temp: 22.0 C / 295.1 K  
 Operator: lye

Relax. delay: 3.000 sec  
 Pulse: 58.7 degrees

Acq. time: 1.300 sec  
 Width: 40000.0 Hz

102 repetitions  
 OBSERVE: C13, 125.6889854 MHz  
 DECOUPLE: H1, 499.8588575 MHz

Power: 36 dB  
 on during acquisition  
 off during delay

WALTZ-16 modulated  
 DATA PROCESSING

Line broadening: 0.5 Hz  
 FT size: 131072  
 Total time: 0 min

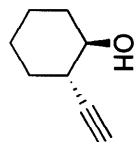

3r

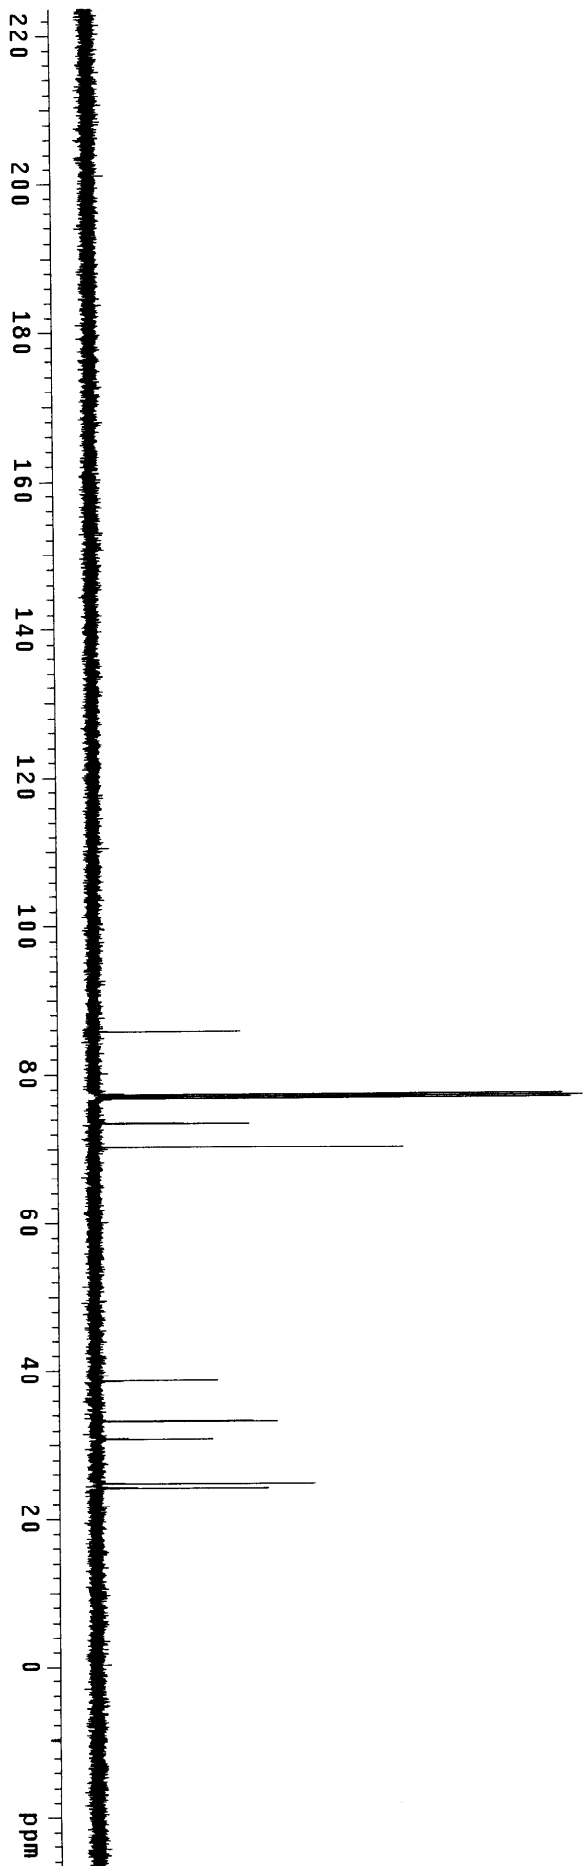

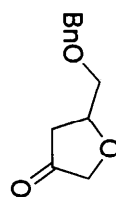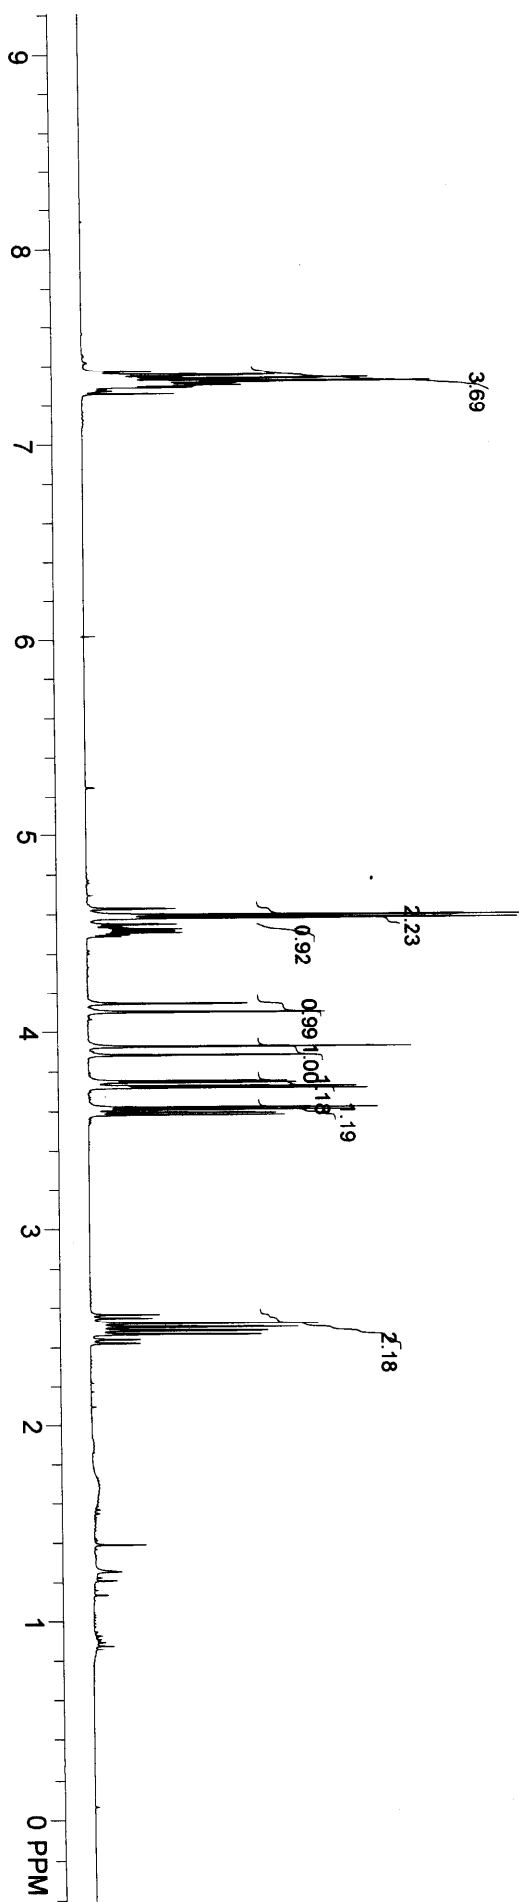

y1w-3-171-c

Data Collected on:  
nmr500-1nov4500  
Archive directory:  
/export/home/vmmr1/vmmr1sys/data  
Sample directory:

File: CARBON

Pulse Sequence: s2pu1  
Solvent: cdcl3  
Temp: 22.0 C / 295.1 K  
Operator: lye

Relax. delay 3.000 sec  
Pulse: 58.7 degrees  
Acq. time 1.300 sec  
Width 4000.0 Hz  
62 repetitions  
OBSERVE C13, 125.6889872 MHz  
DECOUPLE H1, 499.8588575 MHz  
Power 36 db  
on during acquisition  
off during delay  
WALTZ-16 modulated  
DATA PROCESSING  
Line broadening 0.5 Hz  
FT size 131072  
Total time 0 min

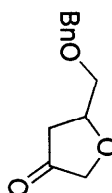**4a**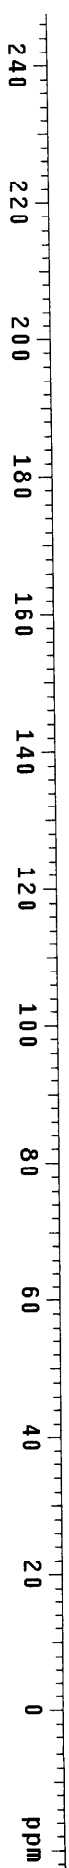



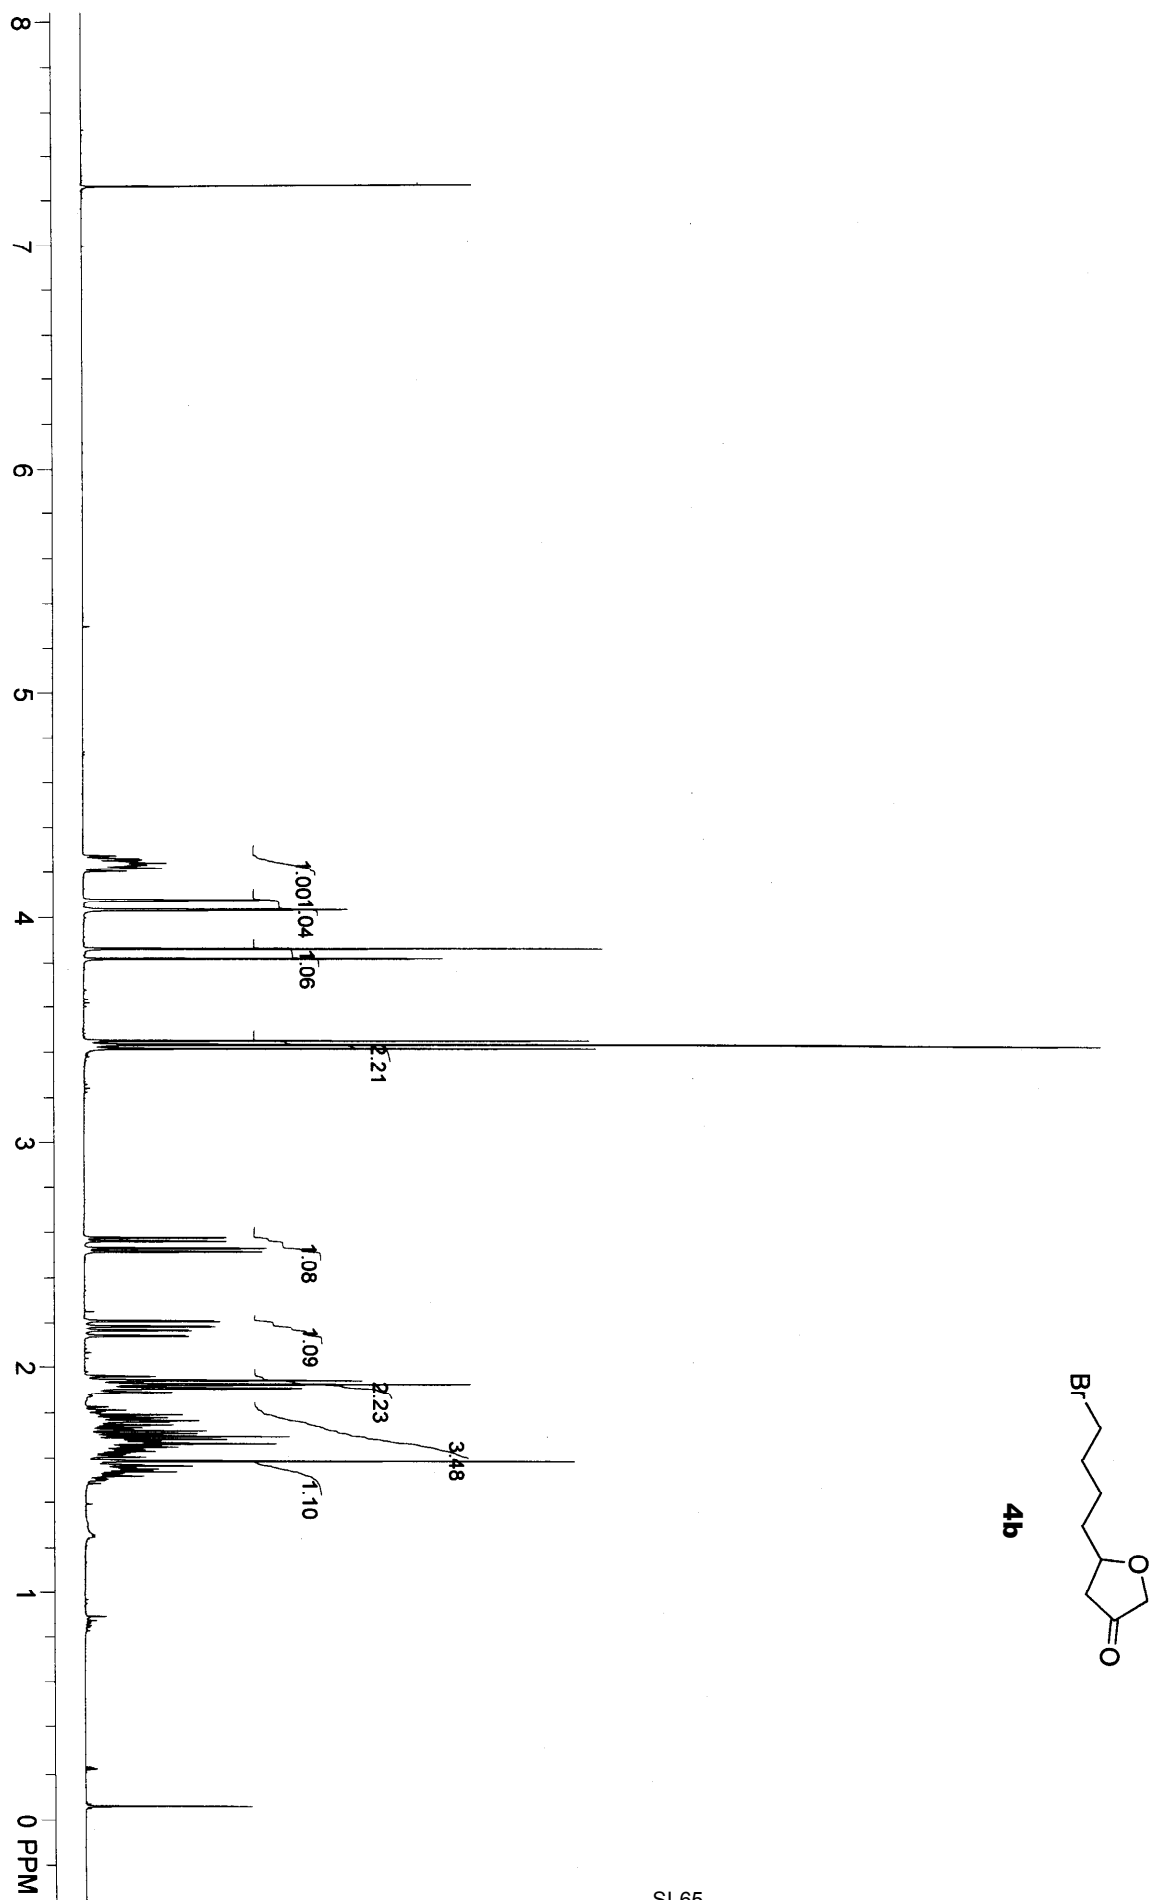

STANDARD CARBON PARAMETERS

```

exp1 CARBON

SAMPLE 1 2010
date Jan 1 2010
solvent cdcl3
file /home/Zhang/g~
uzhang/C13-2009122~
8-2.fid
ACQUISITION 8-2.fid
SW 34995.6
at 1.301
np 91024
fb 19000
bs 2
d1 3.000
nt 12000
ct 2162
TRANSMITTER C13
tn sfreq 125.702
tof 865.4
lpwr 6.000
pw DECOUPLER H1
dn 0
dof 0
dm nny
decwave 36
dpwr 11101
dmf 11101

SPECIAL 22.0
temp gain 54
sp in 20
hst sp in 0.008
pw90 9.200
alfa 10.000

FLAGS n
n
n
y
m

PROCESSING 0.50
2

DISPLAY not used
-4722.1
34995.1
14400.7
9878.1
105.2
-963.6

PLOT
WC 250
SC 0
VS 10368
th ai
ai cdc ph
  
```

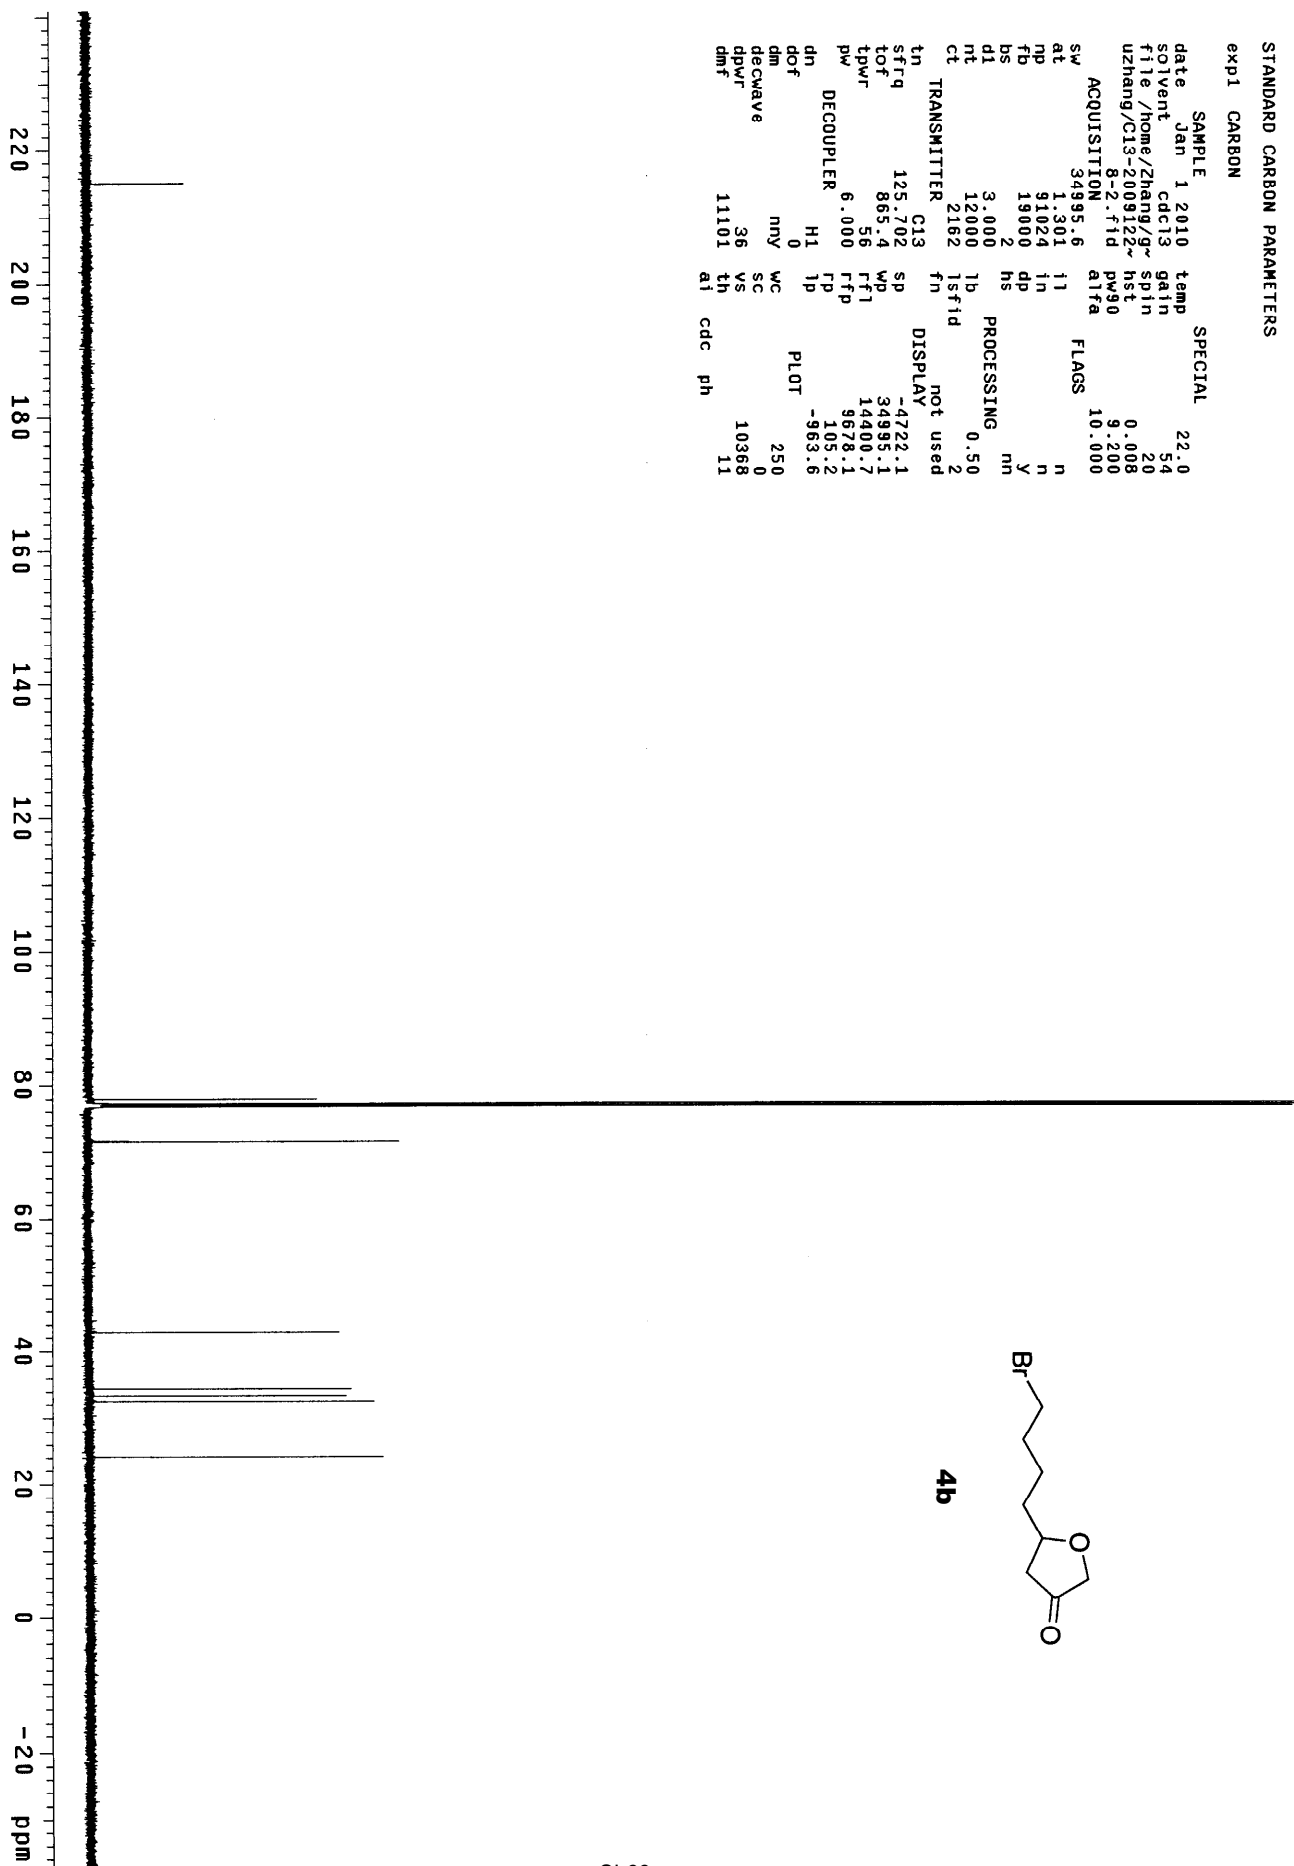

1tcui-3-108-1-1H

Data Collected on:  
nmr500-inova500  
Archive directory:  
/export/home/vnmr1/vnmrsys/data  
Sample directory:

File: H1

Pulse Sequence: szpu1  
Solvent: cdcl3  
Operator: tcui

Relax. delay 2.000 sec  
Pulse 56.8 degrees  
Acq. time 2.068 sec  
Width 5997.0 Hz  
12 repetitions  
OBSERVE H1, 499.8563607 MHz  
DATA PROCESSING  
Resol. enhancement -0.0 Hz  
FT size 32768  
Total time 0 min

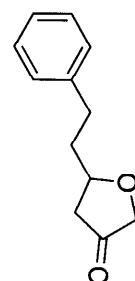

4c

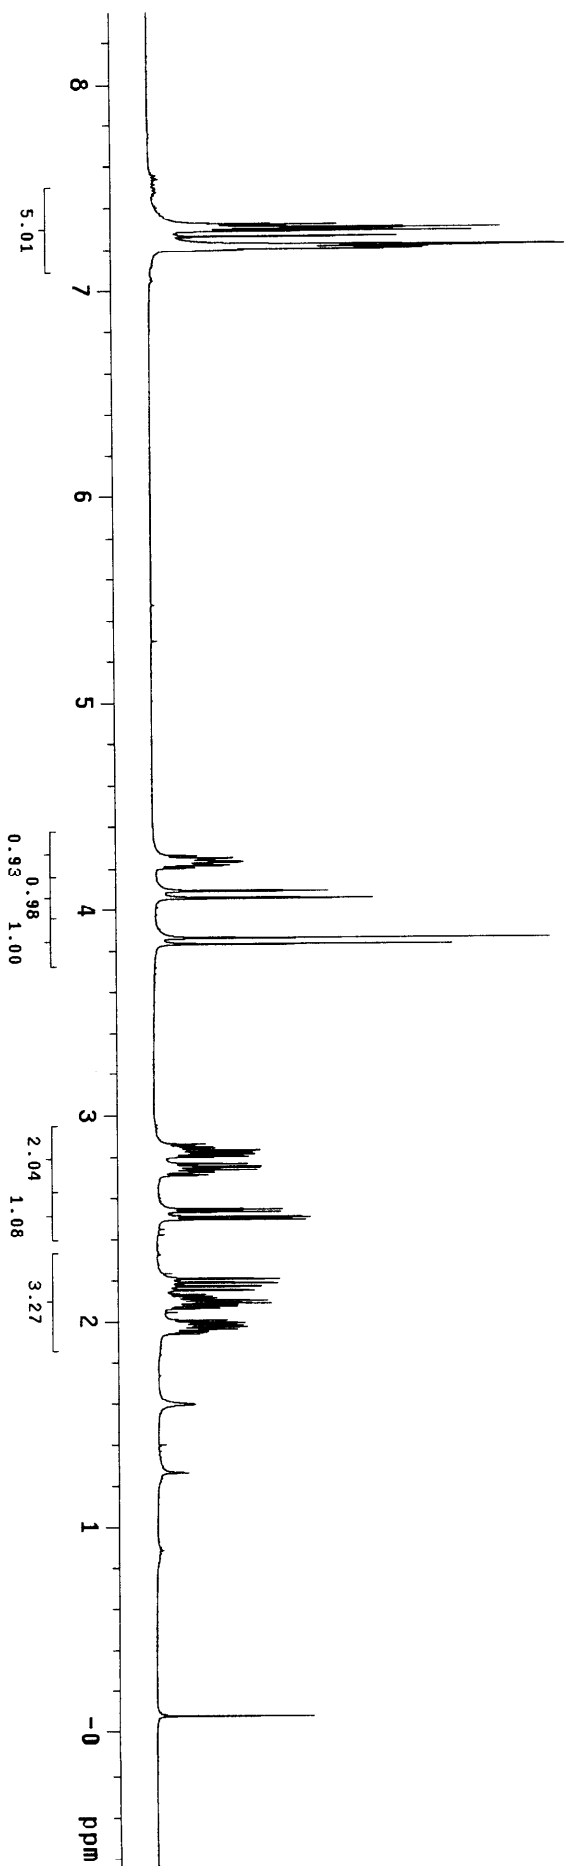

11cui-3-108-1-13CA

Data Collected On:  
mmf500-1nov8500  
Archive directory:  
/export/home/vmmf.1/vmmfSYS/data  
Sample directory:

File: CARBON

Pulse Sequence: s2pul

Solvent: cdcl3

Temp: 25.0 C / 298.1 K

Operator: lcui

Relax. delay 3.000 sec

Pulse 58.7 degrees

Acq. time 1.300 sec

Width 4000.0 Hz

636 repetitions

OBSERVE C13, 125.6889835 MHz

DECOUPLE H1, 499.8588575 MHz

Power 36 db

on during acquisition

off during delay

WALTZ-16 modulated

DATA PROCESSING

Line broadening 1.0 Hz

FT size 131072

Total time 0 min

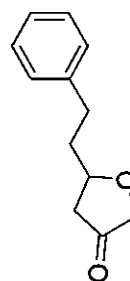

4c

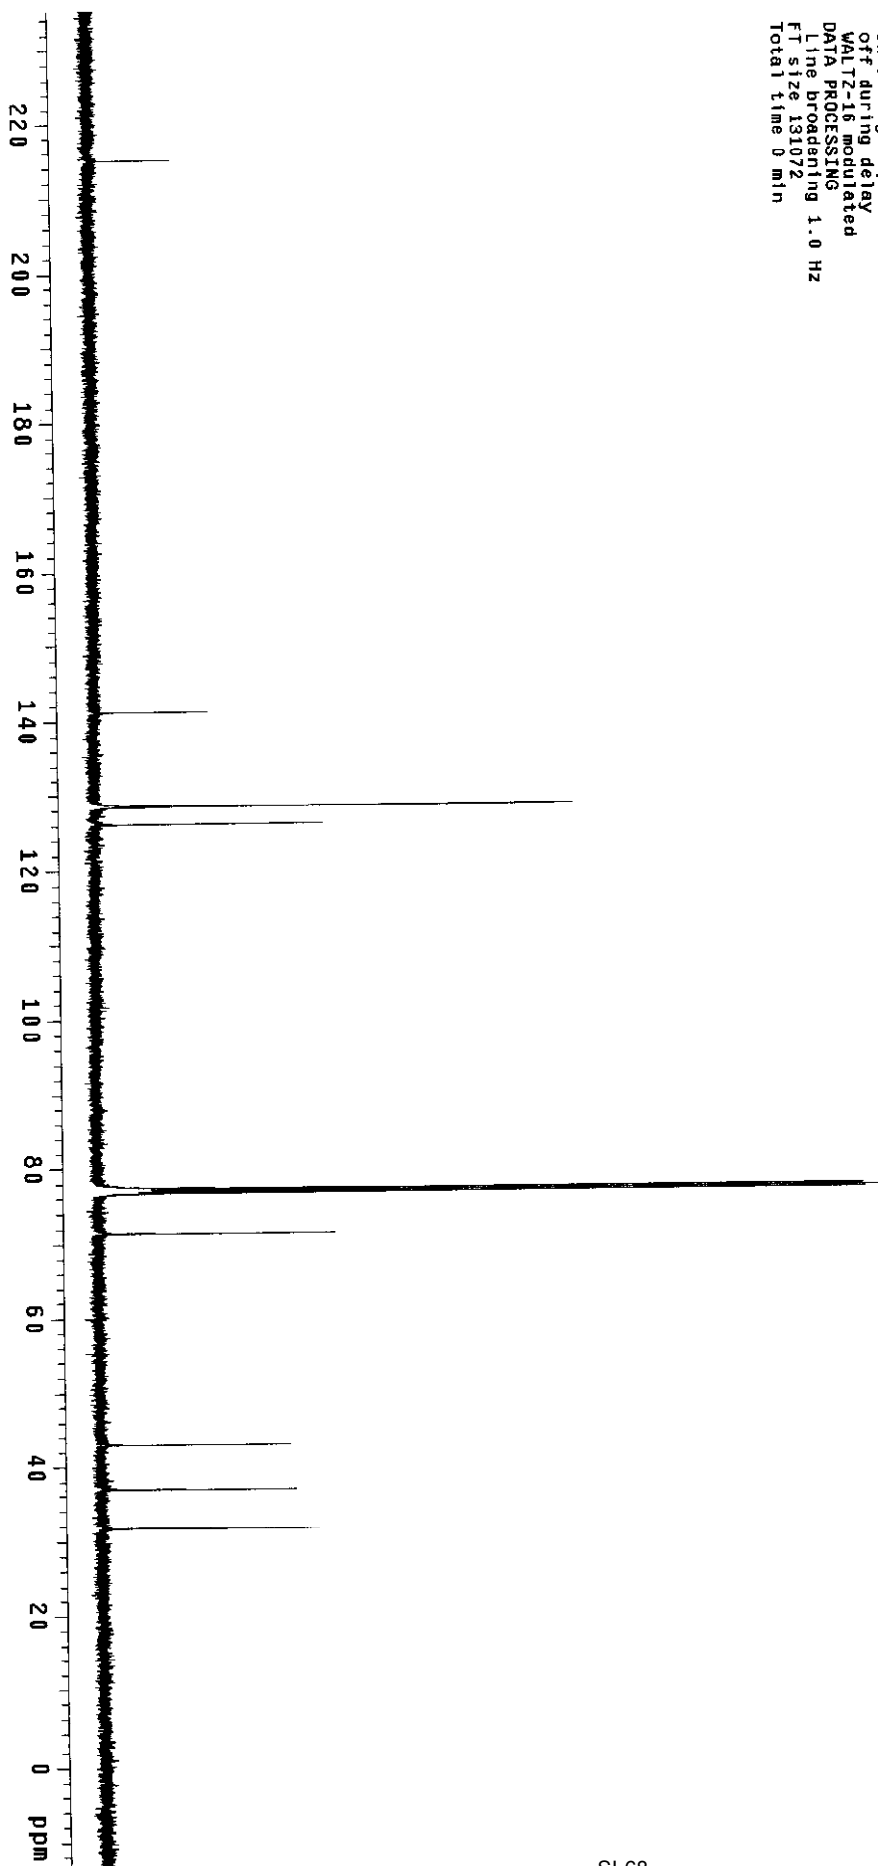

1tcui-3-120-2-1H

Data Collected on: nmr500-indv4500  
Archive directory: /export/home/vnmr1/vnmr-sys/data  
Sample directory:

File: H1

Pulse Sequence: s2pul

Solvent: cdcl3

Operator: tcui

Relax. delay: 2.000 sec

Pulse: 56.8 degrees

Acq. time: 2.668 sec

Width: 5997.0 Hz

16 repetitions

OBSERVE: H1, 499.8563614 MHz

DATA PROCESSING

Resol. enhancement: -0.0 Hz

FT size: 32768

Total time: 0 min

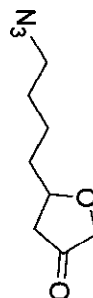

4d

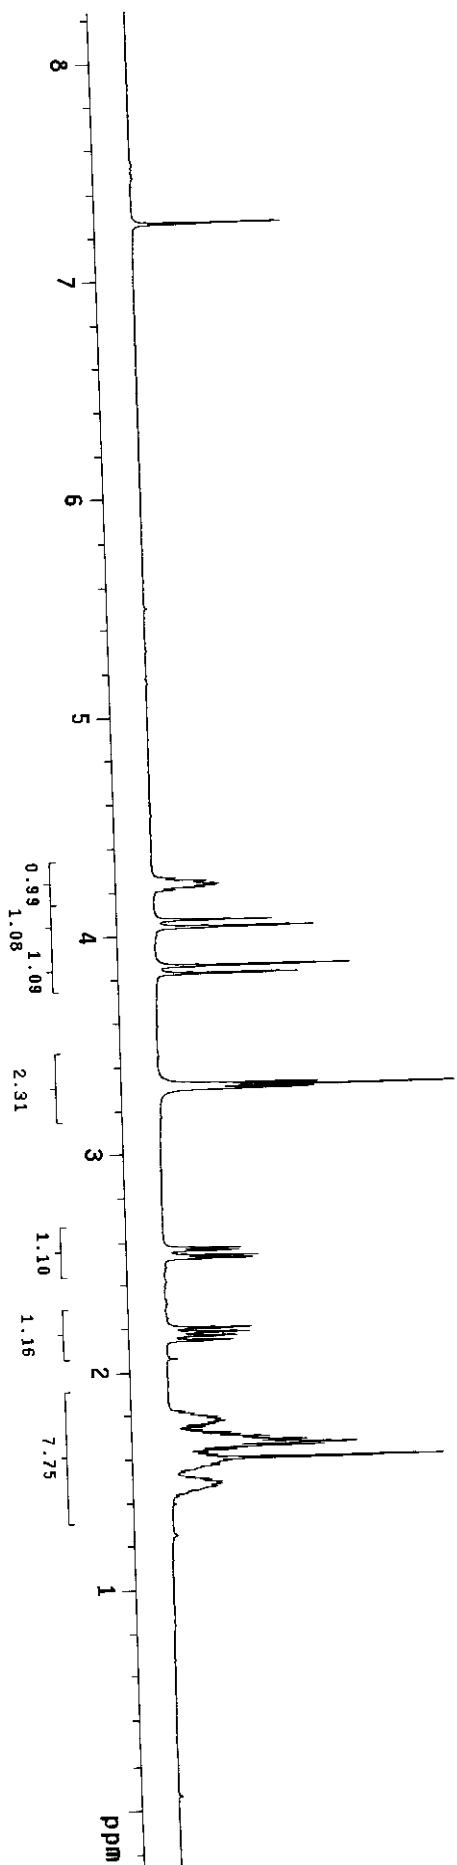

11cui-3-120-2-130

Data Collected on:  
nmr-500-1nov4500  
Archive directory:  
/export/home/vmm1/vmmrSYS/data  
Sample directory:

File: CARBON

Pulse Sequence: s2pu1

Solvent: cdcl3

Temp. 25.0 C / 298.1 K

Operator: lcu1

Relax. delay 3.000 sec

Pulse 58.7 degrees

Acq. time 1.300 sec

Width 40000.0 Hz

136 repetitions

OBSERVE C13, 125.6889817 MHz

DECUPLE H1, 499.8588575 MHz

Power 36 db

on during acquisition

off during delay

WALTZ-16 modulated

MAL T2-16

DATA PROCESSING

Line broadening 1.0 Hz

FT size 131072

Total time 0 min

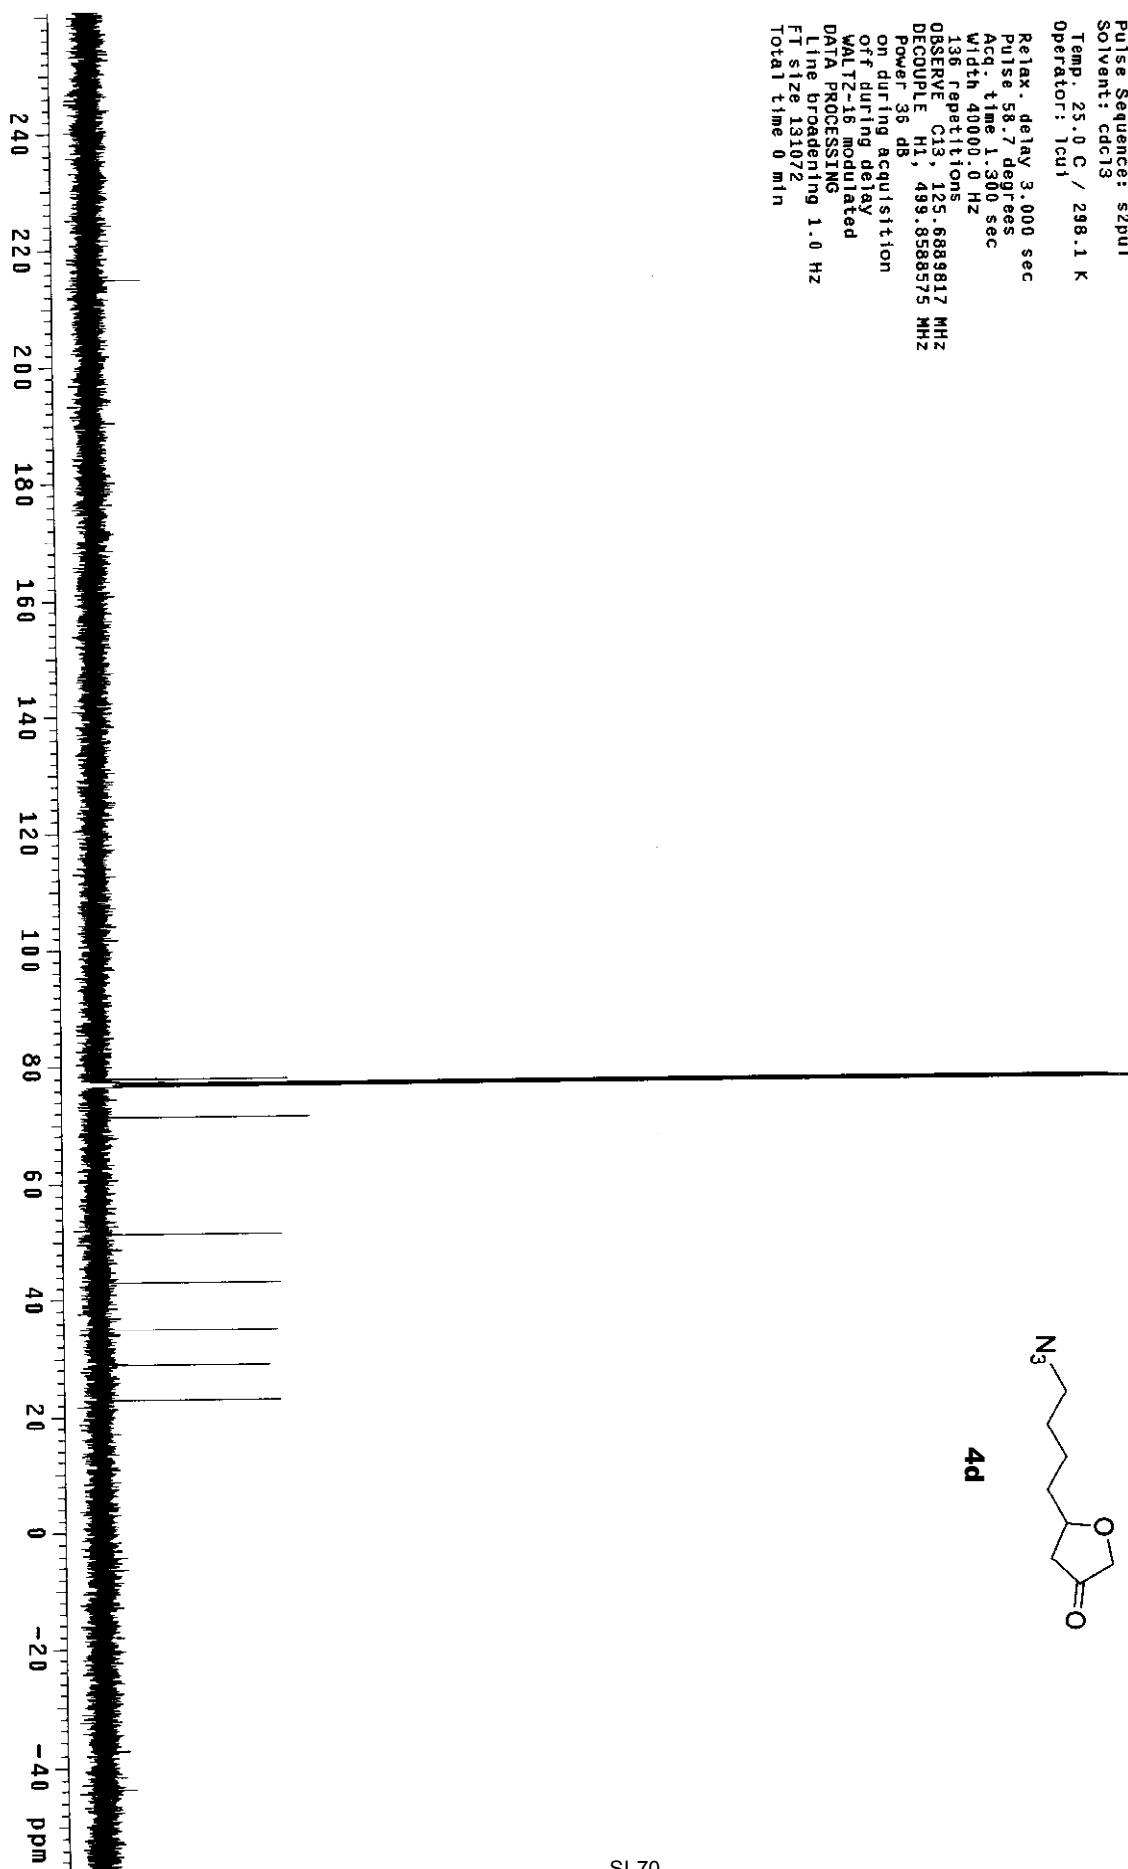

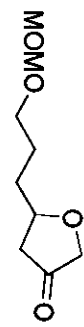

4e

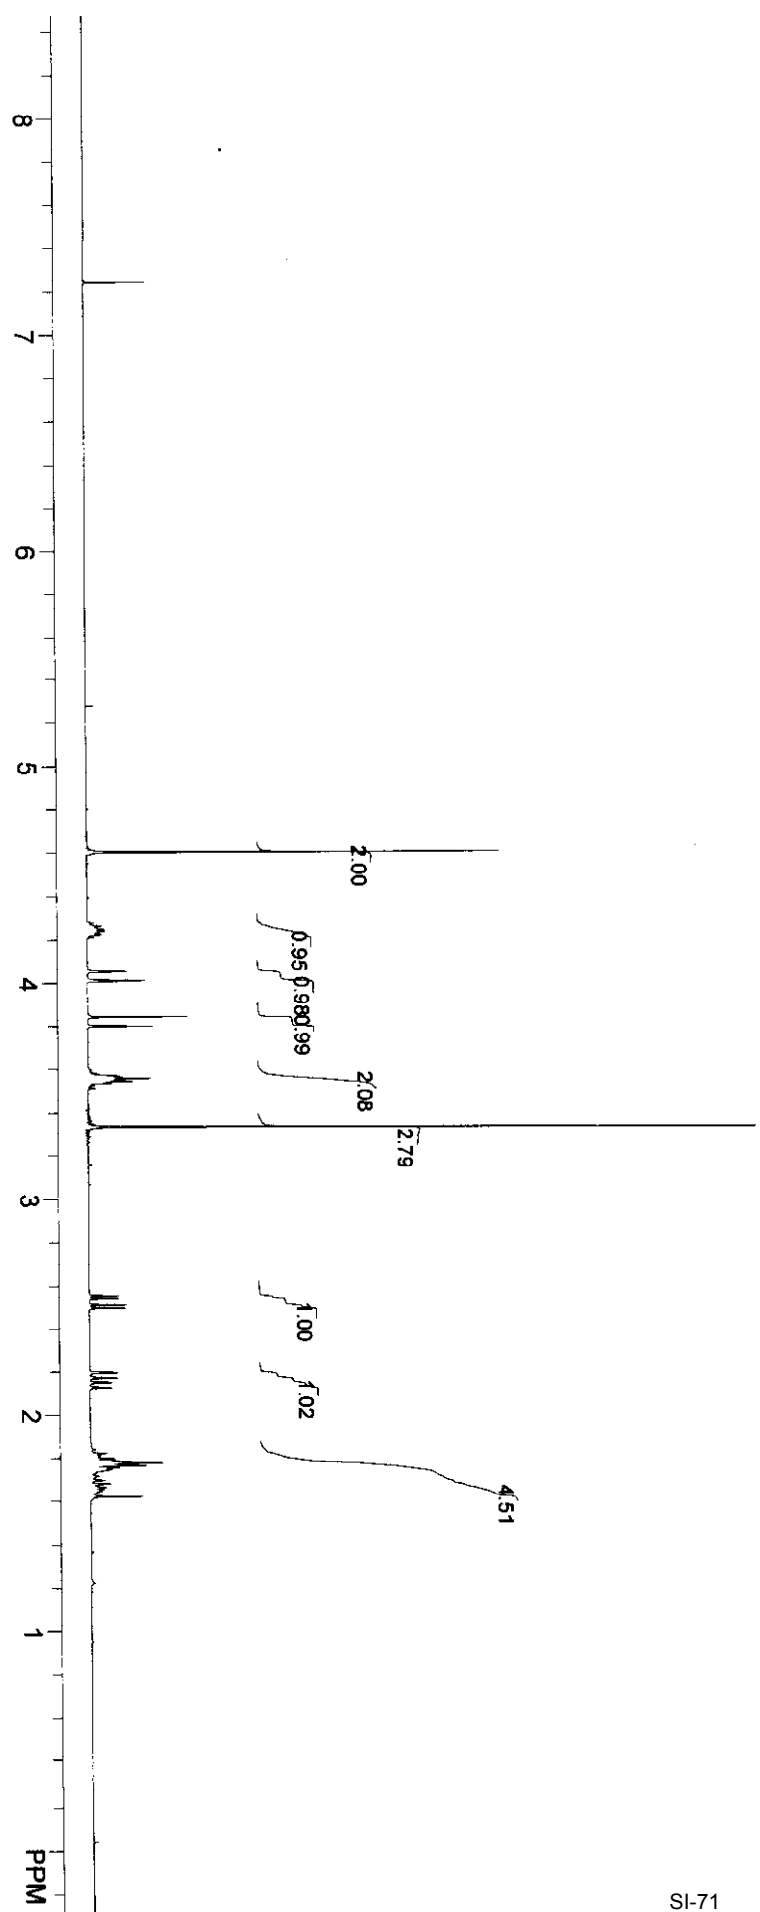

STANDARD CARBON PARAMETERS

```

exp1 CARBON

SAMPLE          SPECIAL
date            Jan 1 2010    temp      22.0
solvent         cdc13         gain       54
file            /home/Zhang/G~  sp1n      20
uzhang/C13-2010010~  hst       0.008
                  -1.f1d      pw90      9.200
                  11.f1d      a1fa     10.000
ACQUISITION
sw              34995.6        flags
at              1.301         n
np              91024         n
fb              19000         dp
bs              4             hs
d1              3.000         PROCESSING 0.50
nt              12000         1b
ct              196          1sfid      2
TRANSMITTER C13          fn          not used
tn            125.702      sp          DISPLAY
stfq          865.4       wp          -4722.6
tpwr          56         rfp1       34995.1
pw            6.000      rfp        14401.2
DECOUPLER    H1          tp          9678.1
dn            0          1p          70.6
DOF          0           PLOT      -873.5
dm           mny        WC         250
decouple     36        SC         0
dpmf         11101     VS         7971
a1           cdc       TH         11
                  ph
    
```

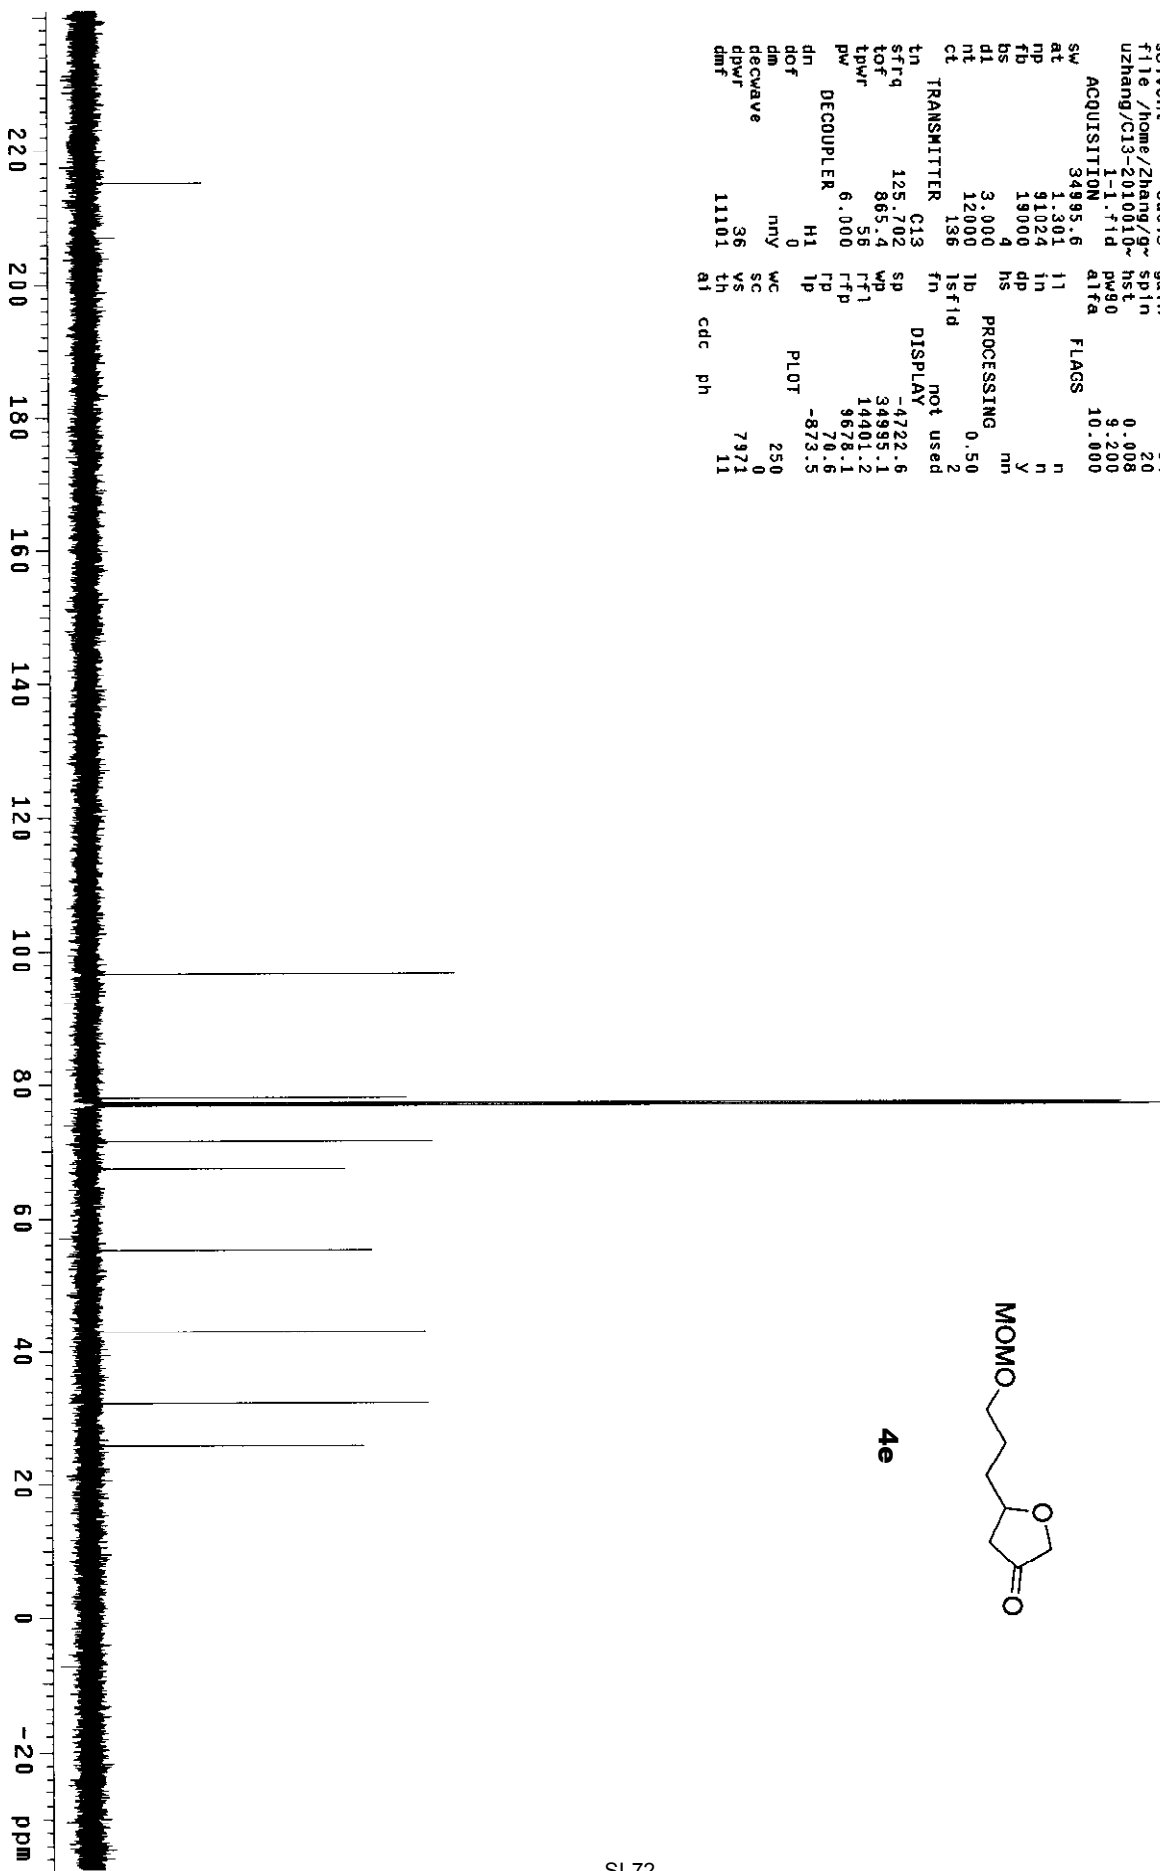



1tcut-3-122-3-1HH  
File: home/Zhang/1tcut/1tcut-3-122-3-1HH.f1d  
Pulse Sequence: s2pu1  
Solvent: cdcl3  
Ambient temperature  
Operator: lcu1  
File: 1tcut-3-122-3-1HH  
INOVA-400 "nmr400"

Relax. delay 3.000 sec  
Pulse 48.5 degrees  
Acq. time 2.000 sec  
Width 5132.5 Hz  
8 repetitions  
OBSERVE H1, 399.9486717 MHz  
DATA PROCESSING  
Line broadening 0.1 Hz  
FT size 85536  
Total time 10 min, 43 sec

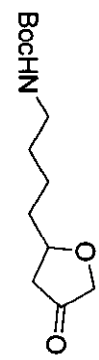

4f

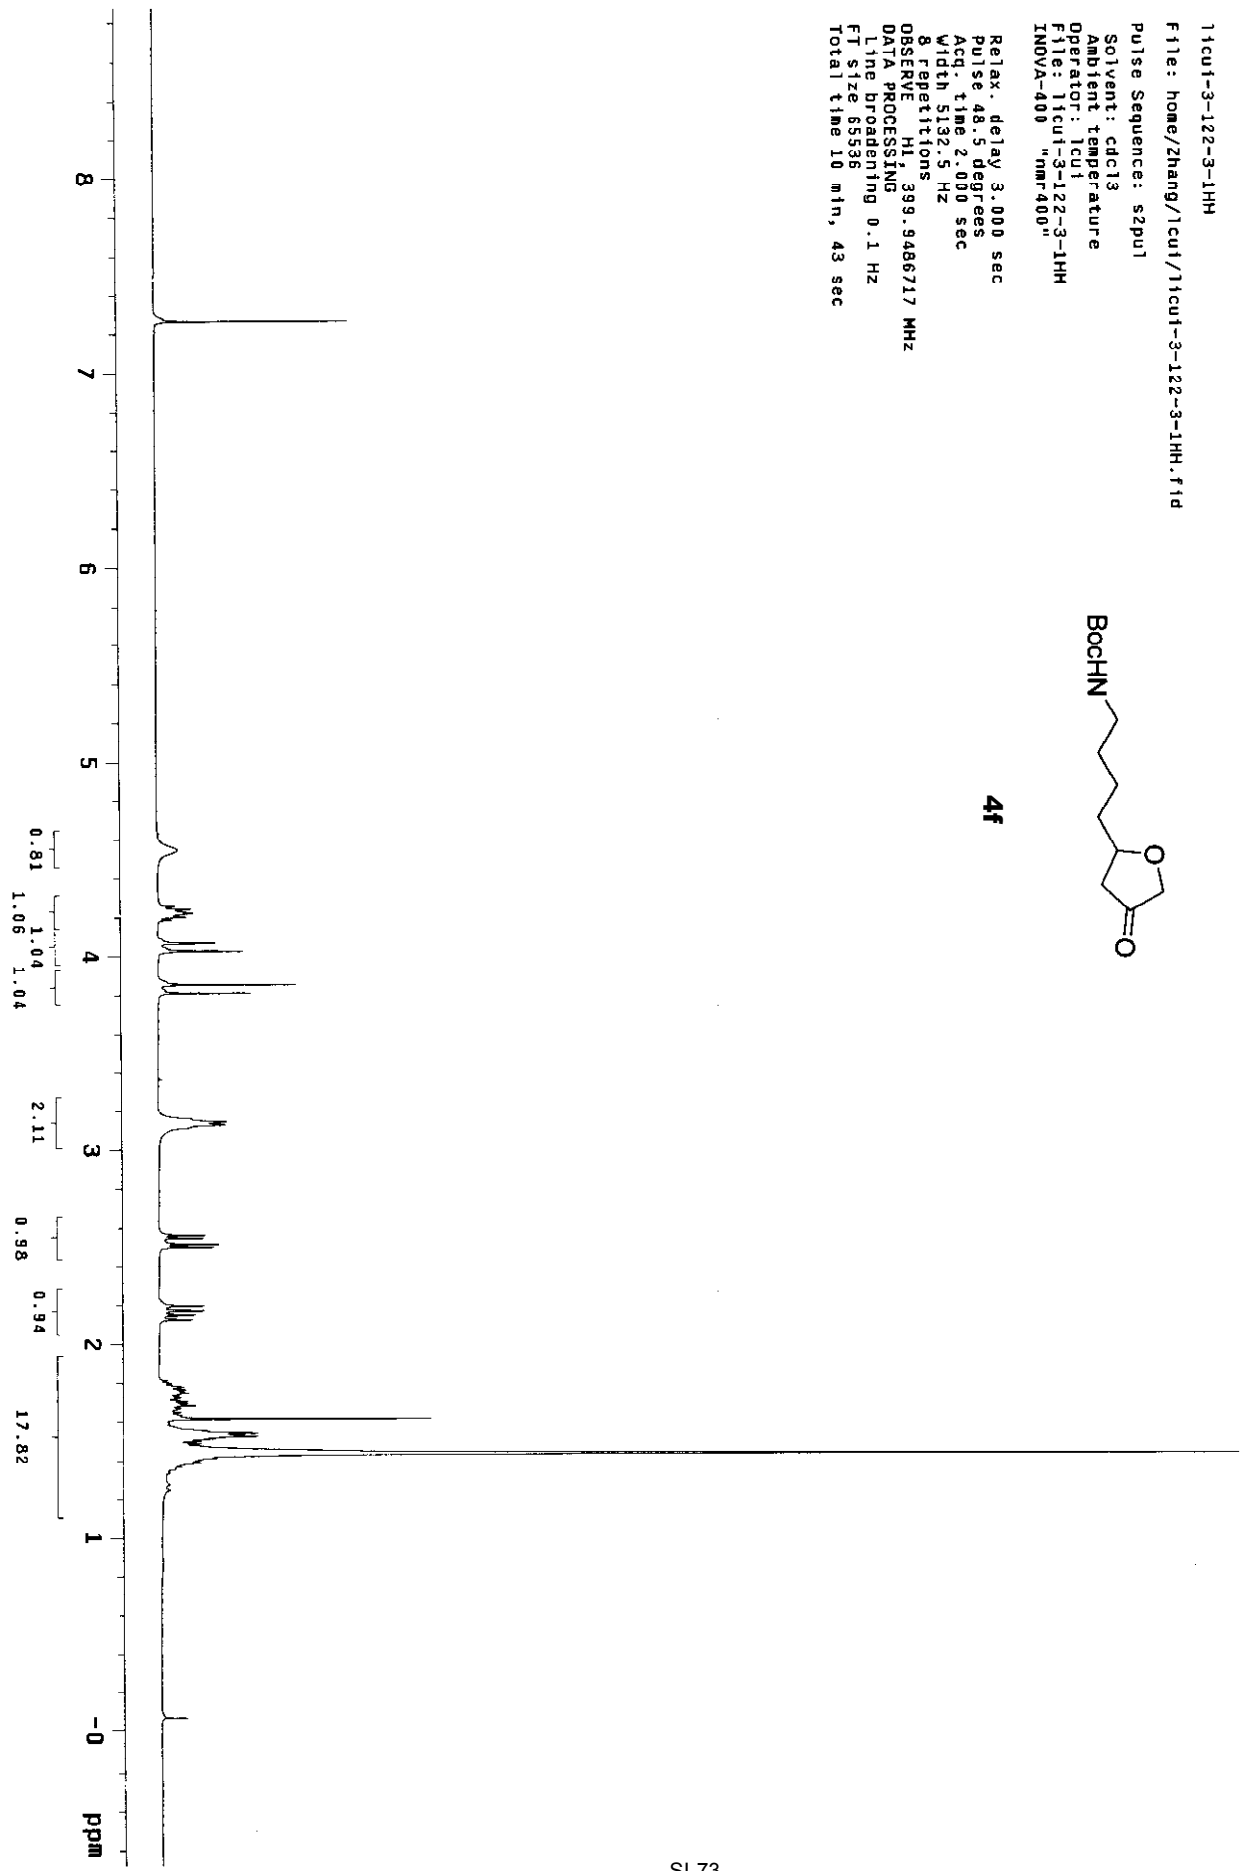

1cul01032010-Noc

Data Collected on:  
nmr500-1nov4500  
Archive directory:  
/export/home/vnmr1/vnmrSYS/data  
Sample directory:

File: CARBON

Pulse Sequence: s2pu1  
Solvent: cdcl3  
Temp. 22.0 C / 295.1 K  
Operator: lye

Relax. delay 3.000 sec  
Pulse 58.7 degrees  
Acq. time 1.300 sec  
Width 40000.0 Hz  
5062 repetitions  
OBSERVE C13, 125.6889829 MHz  
DECUPLE H1, 499.8588575 MHz  
Power 96 dB  
On during acquisition  
Off during delay  
WALTZ-16 modulated  
DATA PROCESSING  
Line broadening 0.5 Hz  
FT size 131072  
Total time 0 min

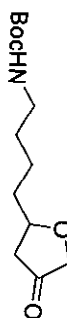

4f

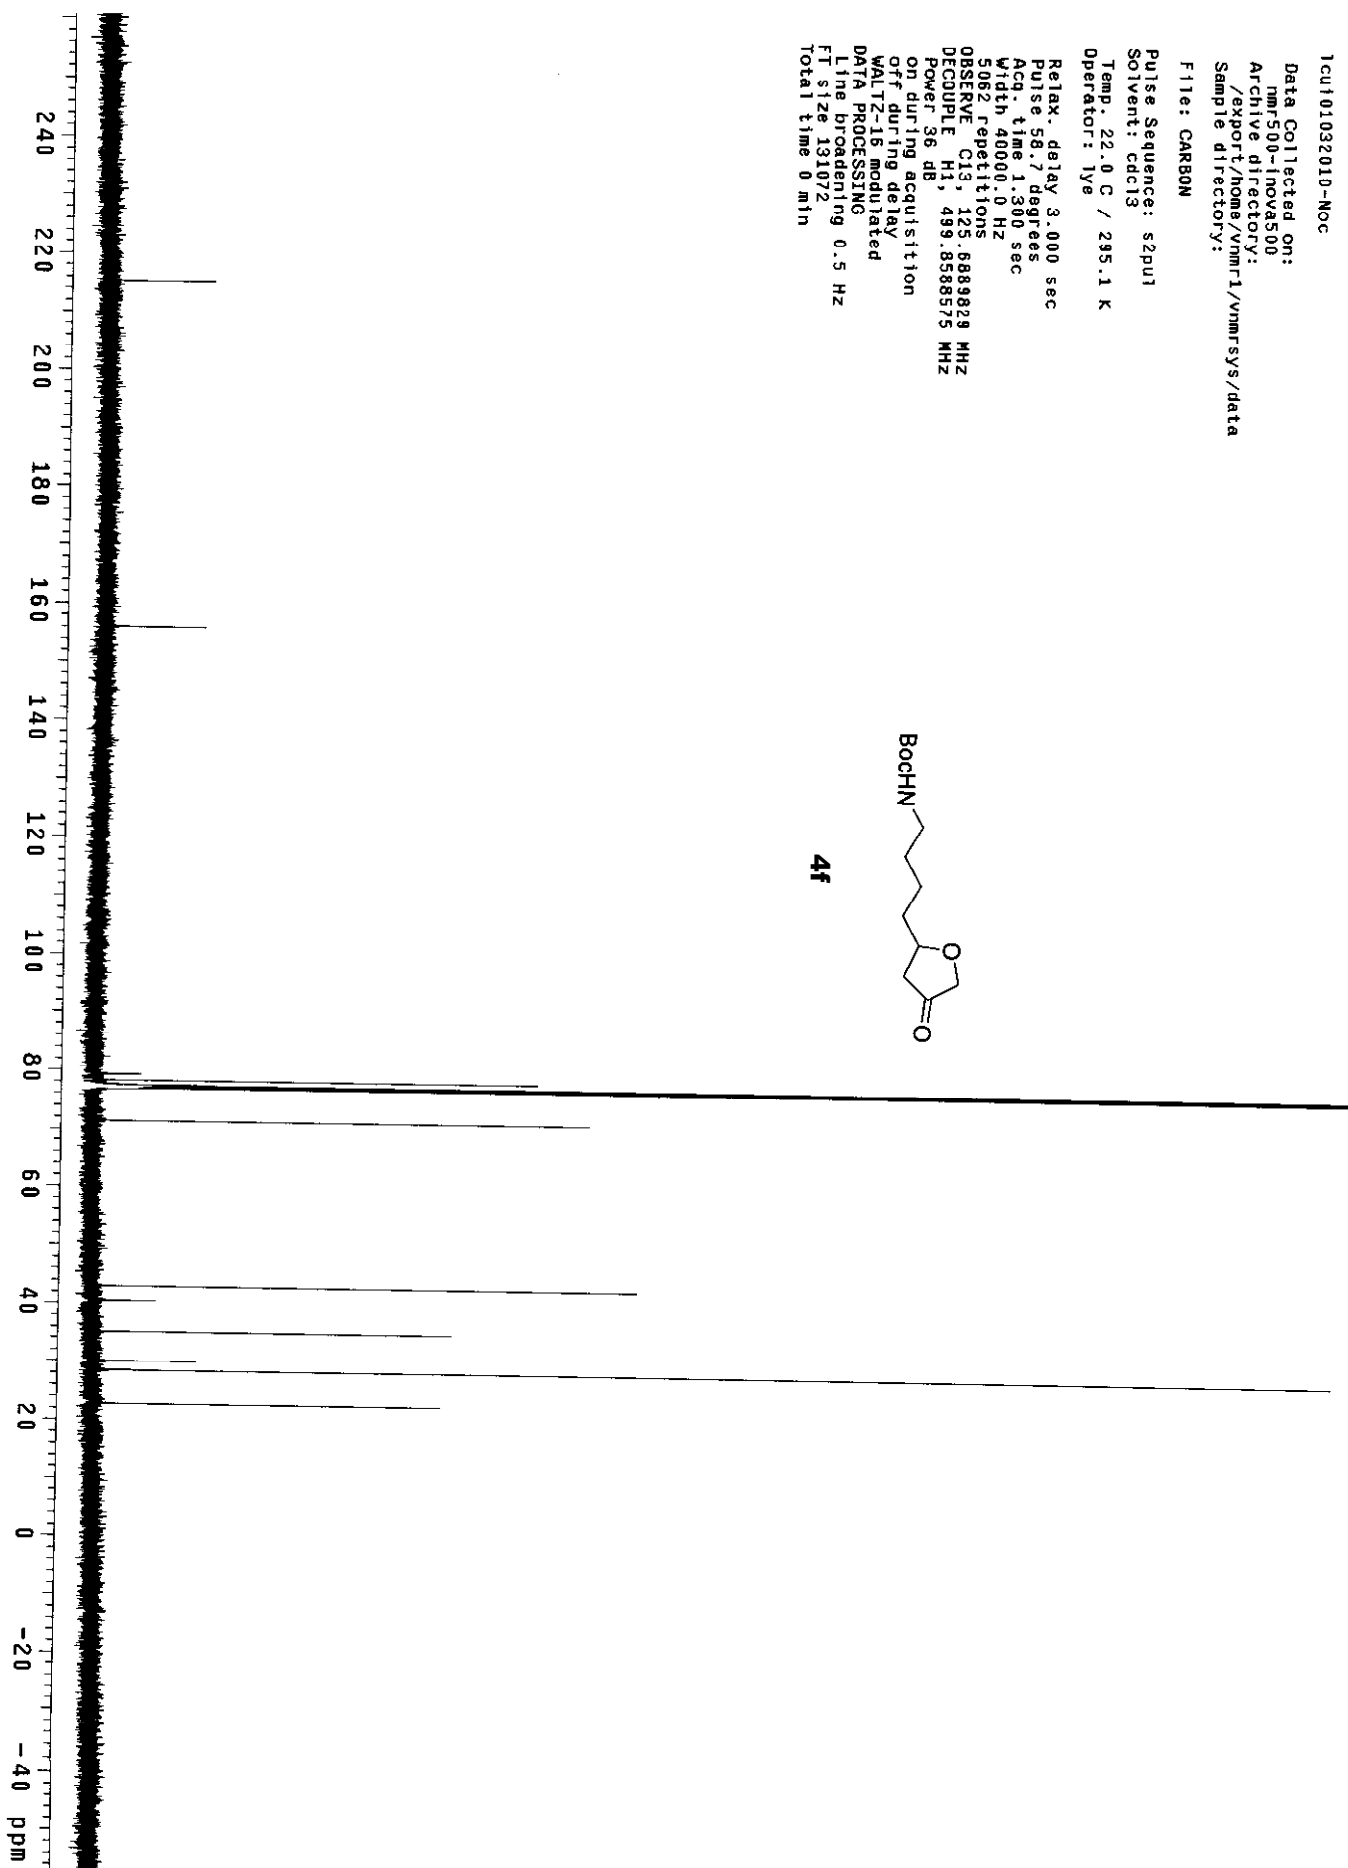

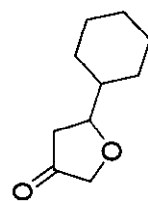

4g

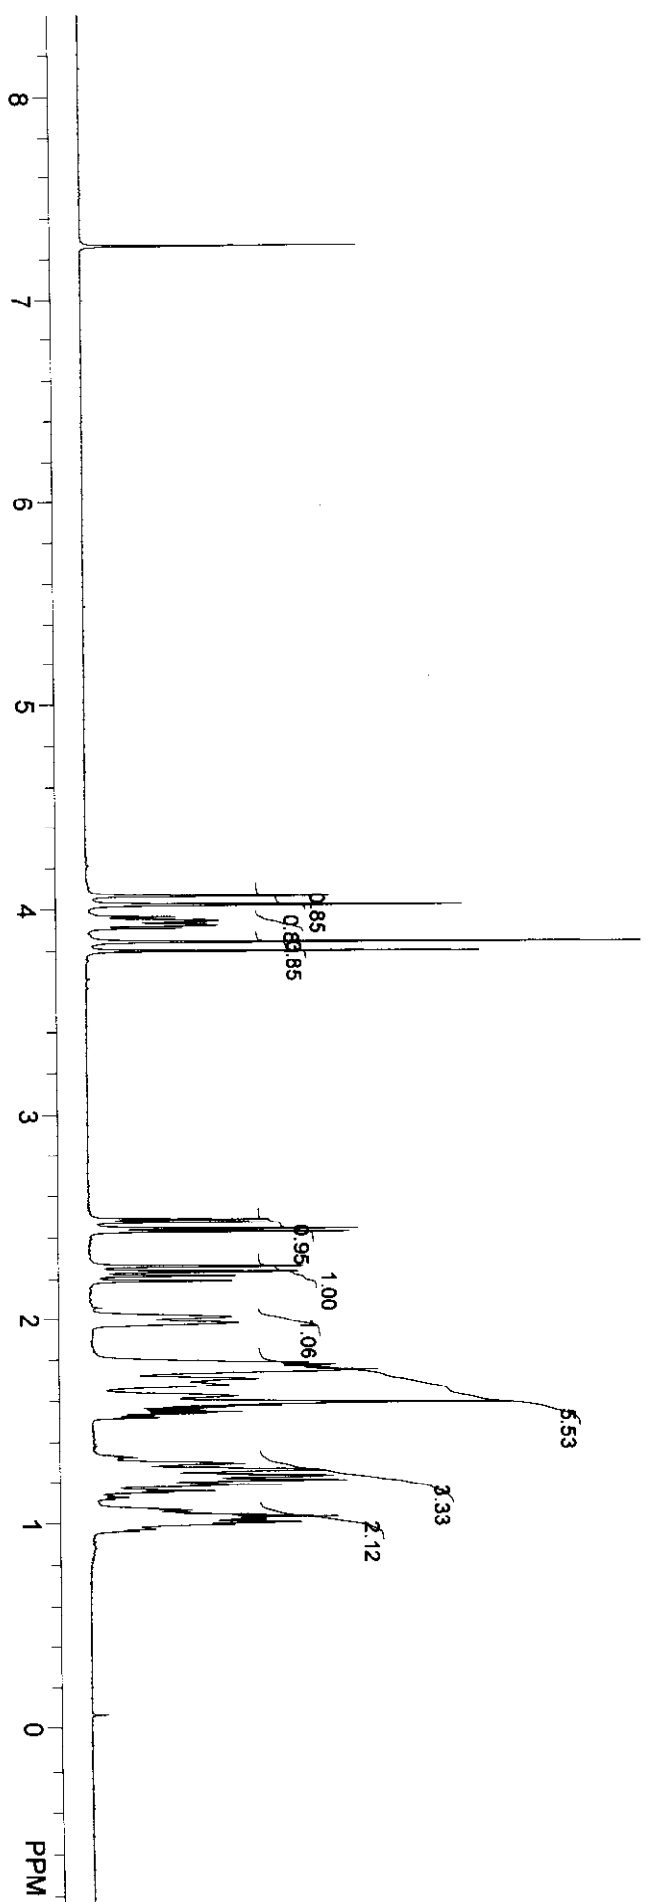

y1w-3-16f-c

Data Collected on:  
nmr500-1nov0500  
Archive directory:  
/export/home/vnmr1/vnmrSYS/data  
Sample directory:

File: CAR80N

Pulse Sequence: s2pul1  
Solvent: cdcl3  
Temp: 22.0 C / 295.1 K  
Operator: lye

Relax. delay 3.000 sec  
Pulse 53.7 degrees  
Acq. time 1.300 sec  
Width 40000.0 Hz  
1000 repetitions  
OBSERVE C13, 125.6889829 MHz  
DECOUPLE H1, 499.8588575 MHz  
Power 36 dB  
on during acquisition  
off during delay  
WALTZ-16 modulated  
DATA PROCESSING  
Line broadening 0.5 Hz  
FT size 131072  
Total time 0 min

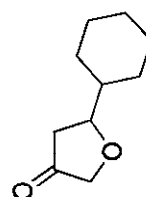

4g

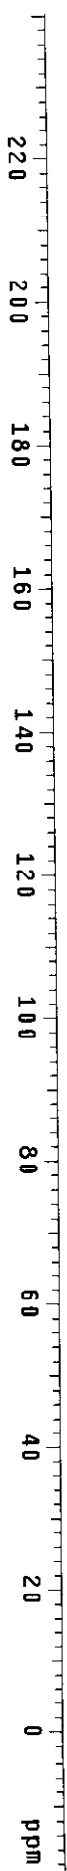

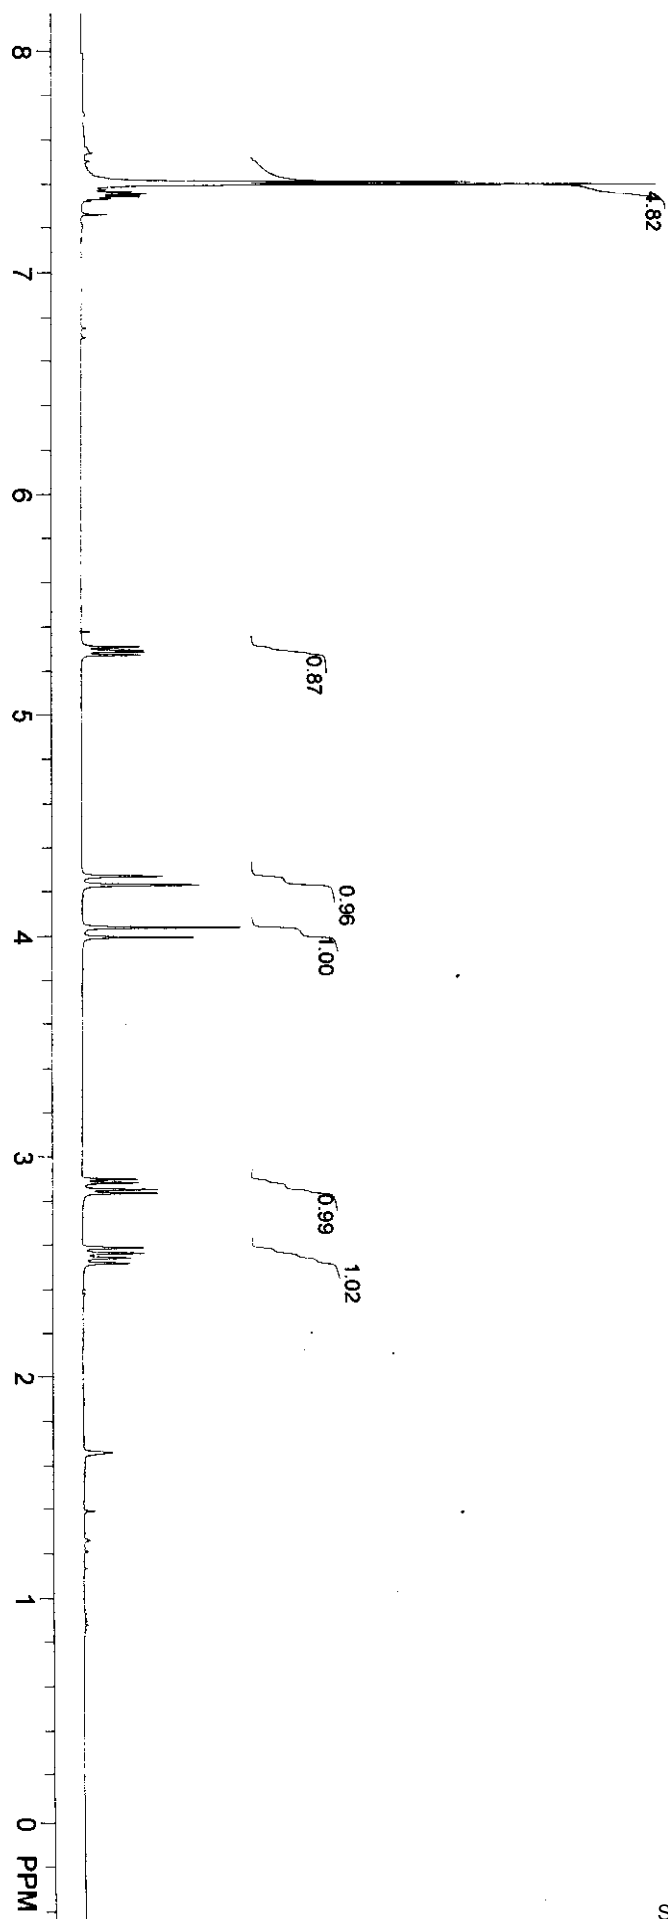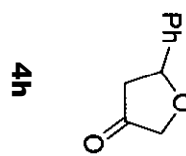

y1w-3-119-c

Data Collected On: nmr500-inova500  
Archive directory: /export/home/vnmr1/vnmr/sys/data  
Sample directory:

File: CARBON

Pulse Sequence: s2pul  
Solvent: cdcl3  
Temp. 22.0 C / 295.1 K  
Operator: lye

Relax. delay 3.000 sec  
Pulse 58.7 degrees  
Acq. time 1.300 sec  
Width 40000.0 Hz  
62 repetitions  
OBSERVE C13, 125.6889884 MHz  
DECUPLE H1, 499.8588575 MHz  
Power 56 db  
on during acquisition  
off during delay  
WALTZ-16 modulated  
DATA PROCESSING  
Line broadening 0.5 Hz  
F1 size 131072  
Total time 0 min

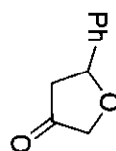

4h

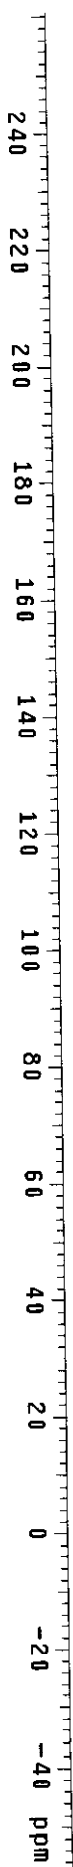

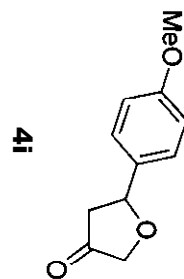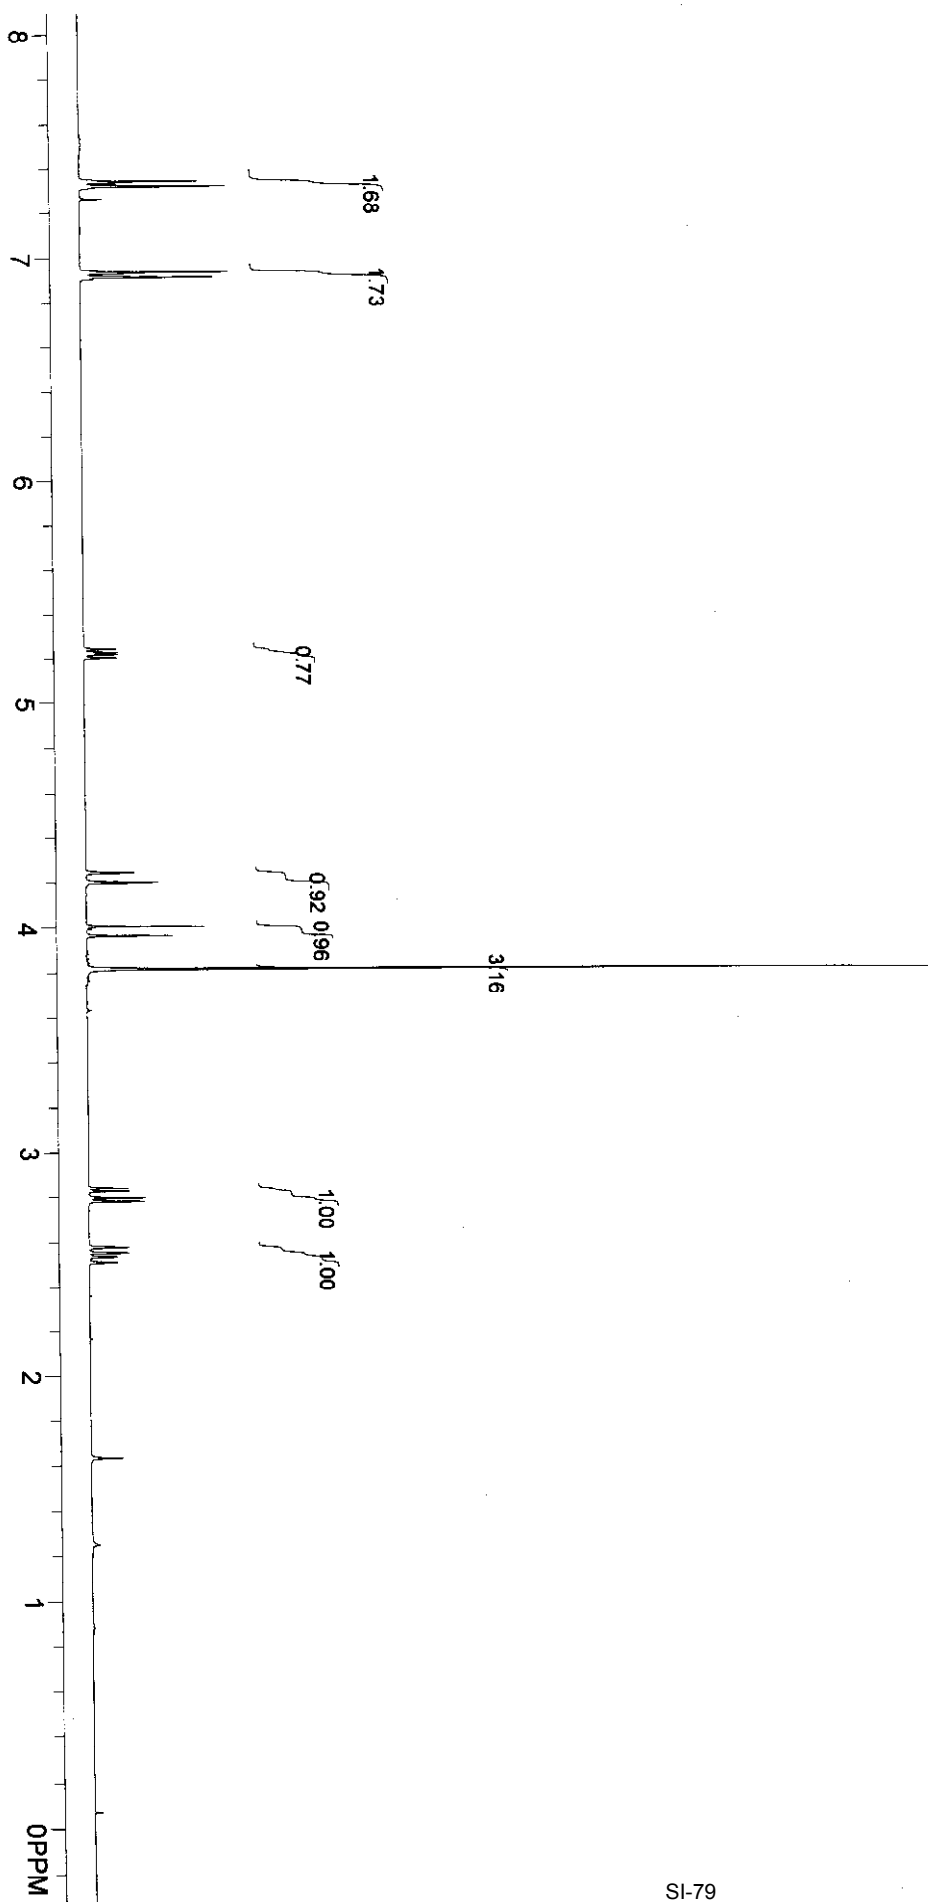

y1w-3-155-c

Data Collected on: nmr500-jncv0500  
Archive directory: /export/home/vnmr1/vnmrSYS/data  
Sample directory:

File: CARBON

Pulse Sequence: s2pu1  
Solvent: cdcl3  
Temp: 21.9 C / 285.1 K  
Operator: lye

Relax. delay: 3.000 sec  
Pulse: 58.7 degrees  
Acq. time: 1.300 sec  
Width: 40000.0 Hz  
88 repetitions  
OBSERVE: C13, 125.6889872 MHz  
DECUPLE: H1, 499.8588575 MHz  
Power: 36 dB  
On during acquisition  
Off during delay  
WALTZ-16 modulated  
DATA PROCESSING  
Line broadening: 0.5 Hz  
FT size: 131072  
Total time: 0 min

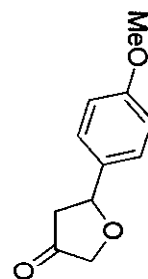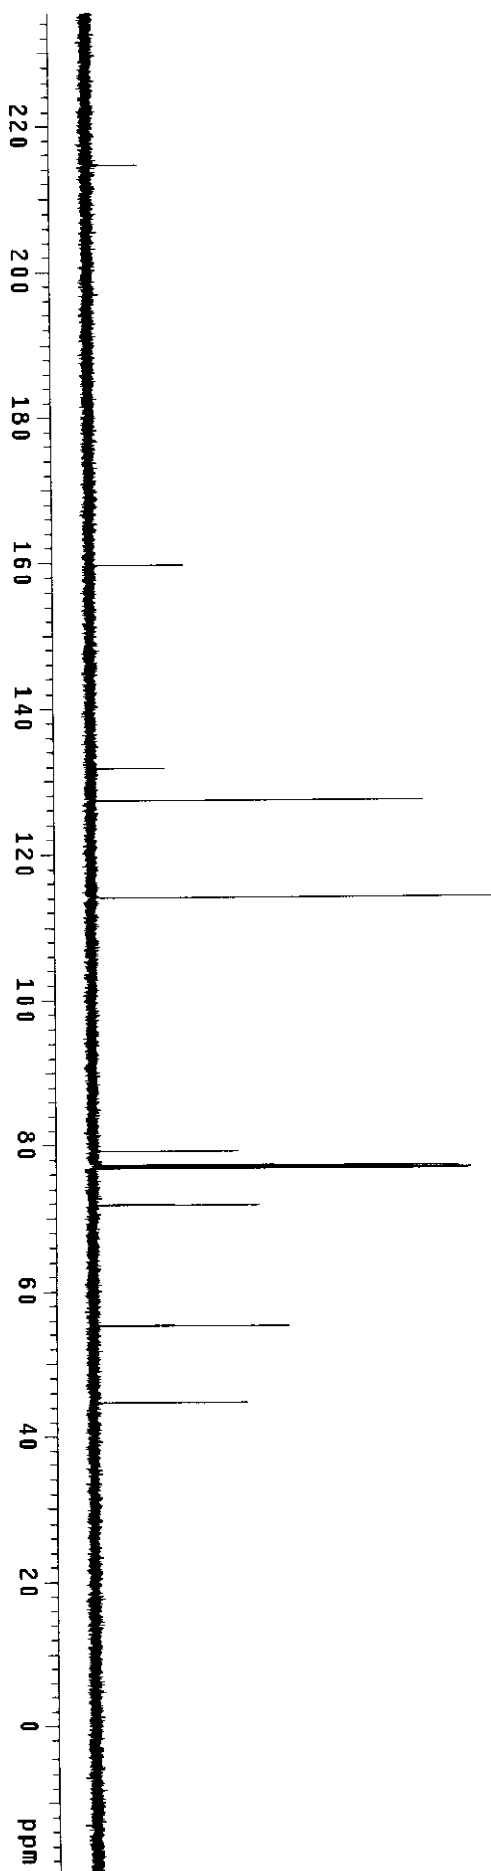



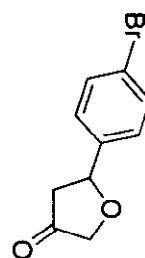

4j

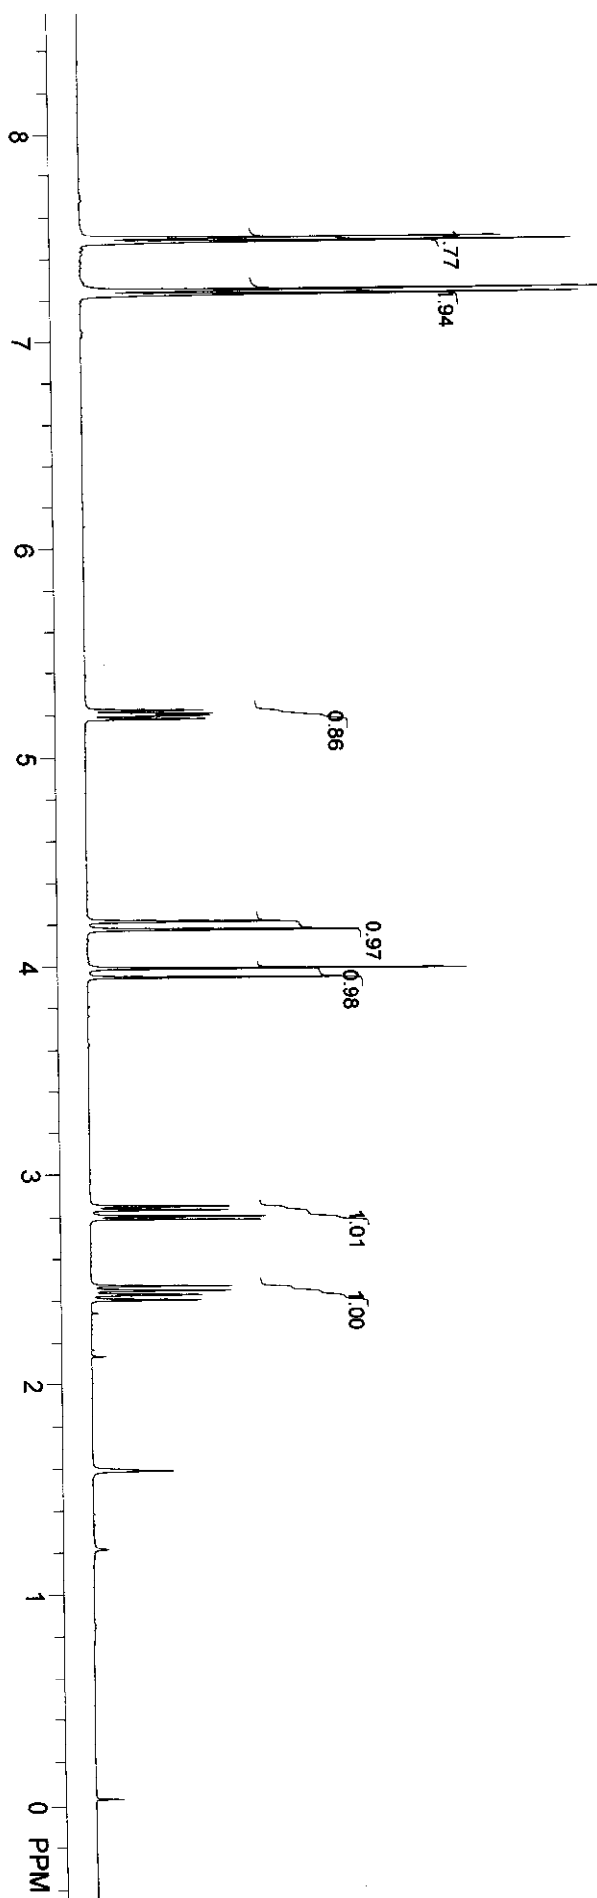

Y1W-3-153-C

Data Collected on:  
nmr500-inova500  
Archive directory:  
/export/home/vnmr1/vnmr500/data  
Sample directory:

File: CARBON

Pulse Sequence: s2pu1  
Solvent: cdcl3

Temp: 22.0 C / 295.1 K  
Operator: lye

Relax. delay: 3.000 sec  
Pulse: 58.7 degrees  
Acq. time: 1.300 sec  
Width: 40000.0 Hz

90 repetitions  
OBSERVE: C13, 125.6889866 MHz  
DECUPLE: H1, 499.8588575 MHz

Power: 36 dB  
on during acquisition  
off during delay  
WALTZ-16 modulated  
DATA PROCESSING  
Line broadening: 0.5 Hz  
FT size: 131072  
Total time: 0 min

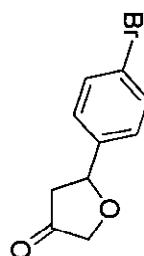

4j

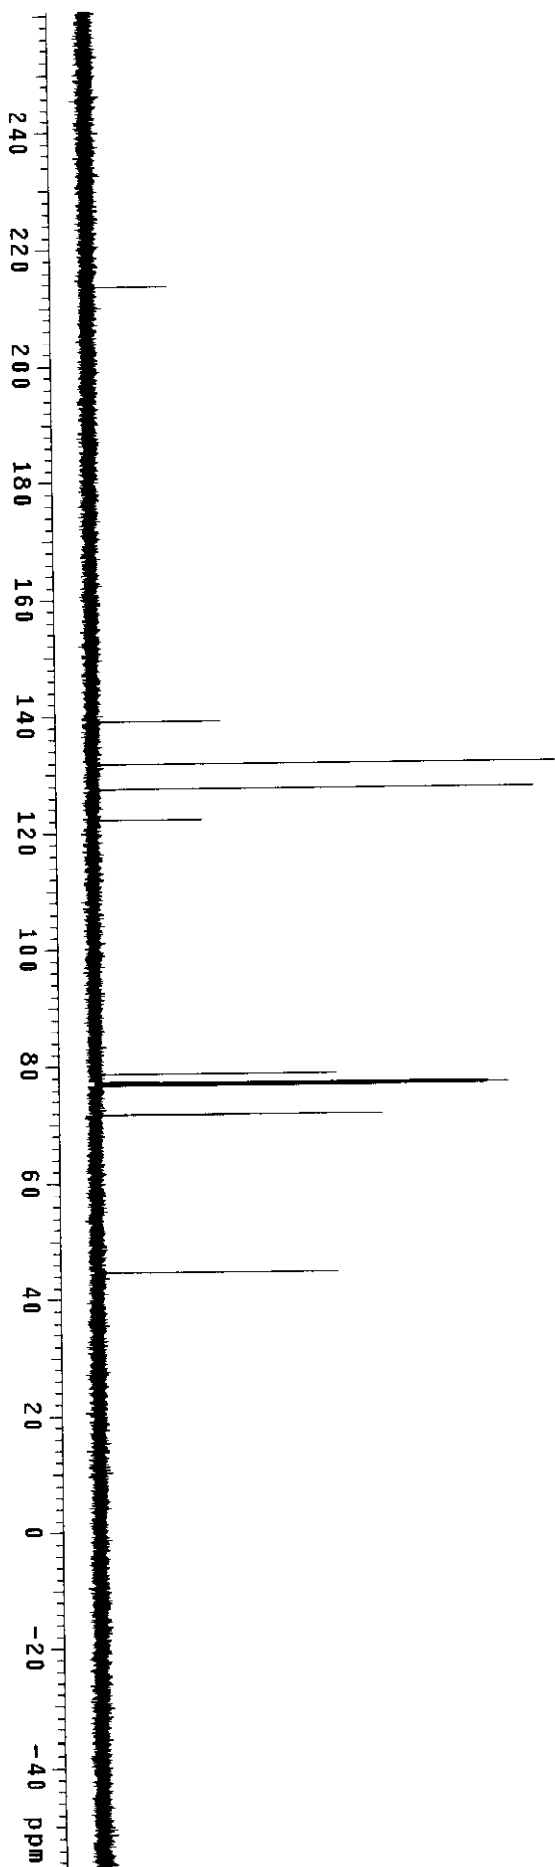

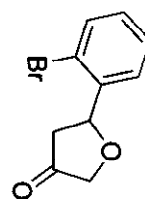

4k

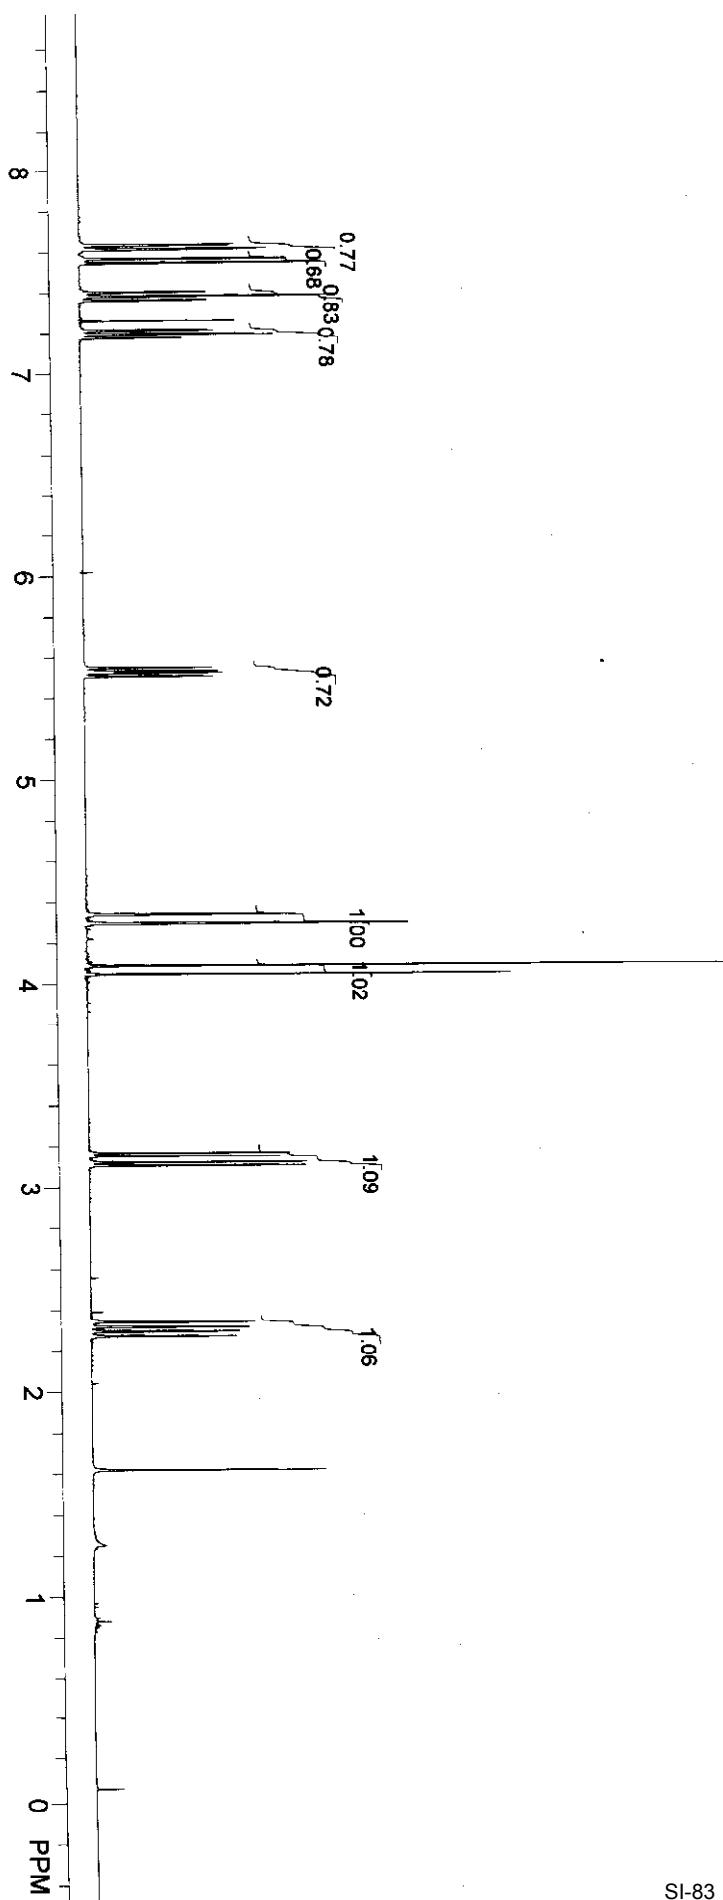

Y1W-3-156-c

Data Collected on:  
mmr500-1nov0300  
Archive directory:  
/export/home/vmmr1/vmmr/sys/data  
Sample directory:

File: CARBON

Pulse Sequence: s2pu1  
Solvent: cdcl3  
Temp: 22.0 C / 295.1 K  
Operator: lye

Relax. delay 3.000 sec  
Pulse 58.7 degrees  
Acq. time 1.300 sec  
Width 4000.0 Hz  
76 repetitions  
OBSERVE C13, 125.6889850 MHz  
DECOUPLE H1, 499.8588575 MHz  
Power 36 db  
on during acquisition  
off during delay  
WALTZ-16 modulated  
DATA PROCESSING 0.5 Hz  
Line broadening 131072  
FT size 131072  
Total time 0 min

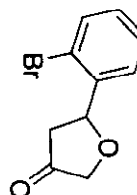

4k

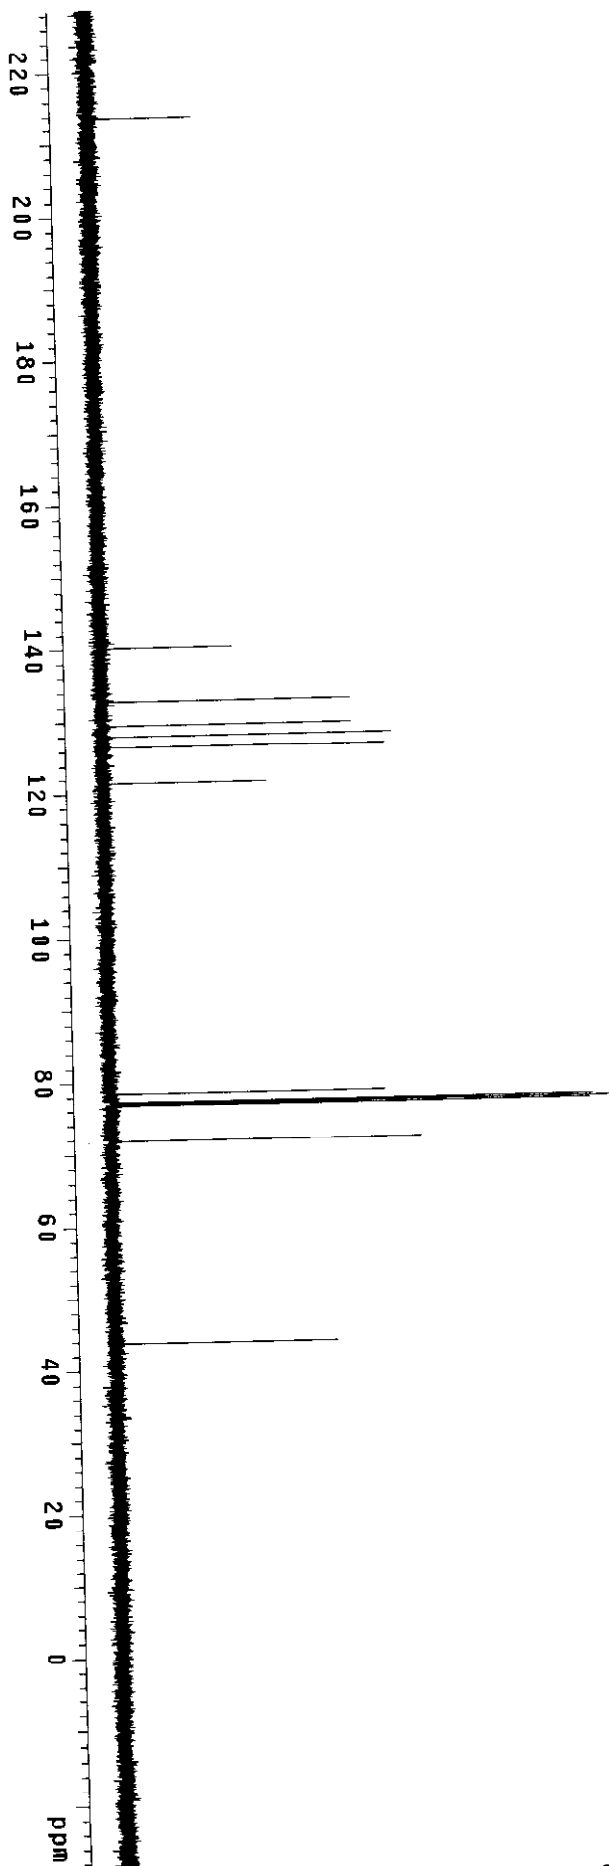

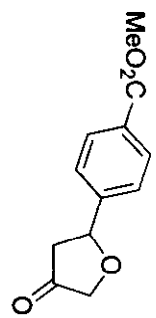

41

```

11cut-3-102-1
exp1 s2pul1
SAMPLE DEC. A VT
date Dec 27 2009 dn H1
solvent cdcl3 dof -1425.0
file /home/zhang/g~ dm nnn
uzhang/guczhuz091~ dmm C
227-4.11d dmt 200
ACQUISITION PROCESSING
sfrq 399.951 1b 0.10
tn H1 fn 65536
at 2.000 math f
np 20530 werr
sw 5132.5 wexp
fb 3000 wbs
bs 2 wnt
pw 7.0
tpwr 7.0 DISPLAY
dl 55 sp -183.1
tof 3.000 wp 3579.3
nt 143.7 vs 19
ct 8 wv 0
atlock n hzmm 250
gain not used rfl 14.32
11 n rfp 154.75
1n n th 440.9
dp y ins 0
hs mn ai 2
ph 1.000
    
```

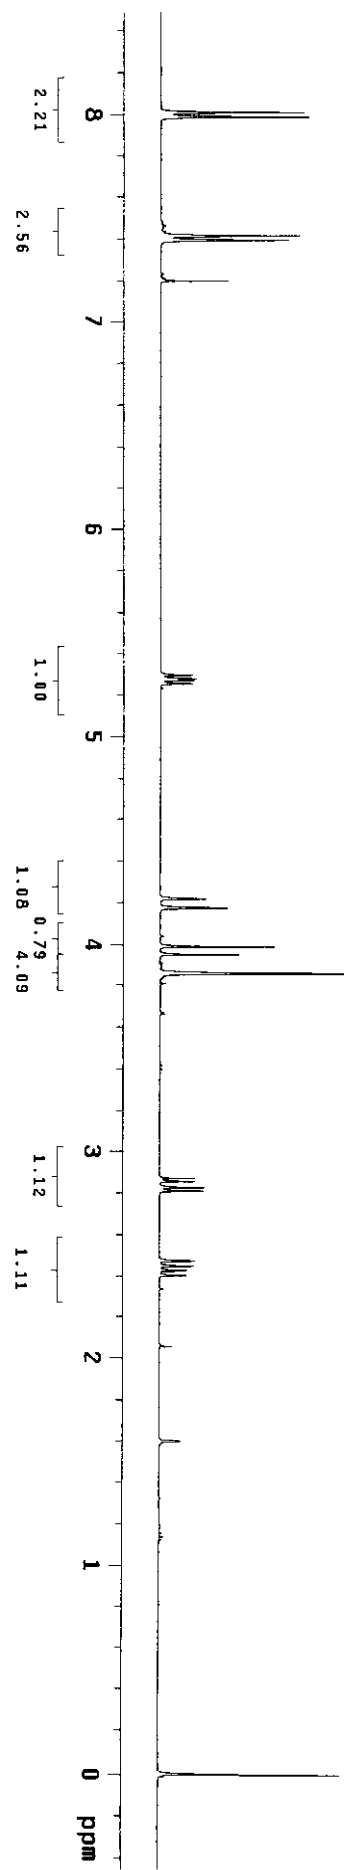

STANDARD CARBON PARAMETERS  
 exp1 CARBON

|         |                |      |        |
|---------|----------------|------|--------|
| date    | Jan 1 2010     | temp | 22.0   |
| solvent | cdcl3          | gain | 54     |
| f1f8    | /home/Zhang/g~ | sp1n | 20     |
| uzhang  | /C13-2009122~  | hst  | 0.008  |
|         | 7-4.f1d        | pw90 | 9.200  |
|         |                | alfa | 10.000 |

ACQUISITION

|    |         |            |      |
|----|---------|------------|------|
| sw | 34995.6 | FLAGS      |      |
| at | 1.301   | l1         | n    |
| nd | 91024   | in         | n    |
| fb | 19000   | dp         | y    |
| bs | 4       | hs         | mn   |
| di | 3.000   | PROCESSING | 0.50 |
| ne | 1200    | lb         | 2    |
| ct | 318     | lsfid      | 2    |

TRANSMITTER

|      |         |     |          |
|------|---------|-----|----------|
| tn   | G13     | fn  | not used |
| sfrq | 125.702 | SP  | -4724.2  |
| lof  | 865.4   | WP  | 34995.1  |
| tpwr | 56      | rfl | 14402.8  |
| pw   | 6.000   | rfp | 9678.1   |

DECOUPLER

|       |       |    |        |
|-------|-------|----|--------|
| dn    | H1    | tp | 102.8  |
| dof   | 0     | tp | -939.2 |
| dm    | ny    | WC | 250    |
| decwv | 36    | SC | 0      |
| dpwr  | 11101 | VS | 5087   |
| dmf   |       | th | 14     |

ai cdc ph

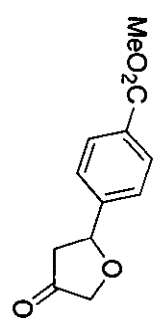

41

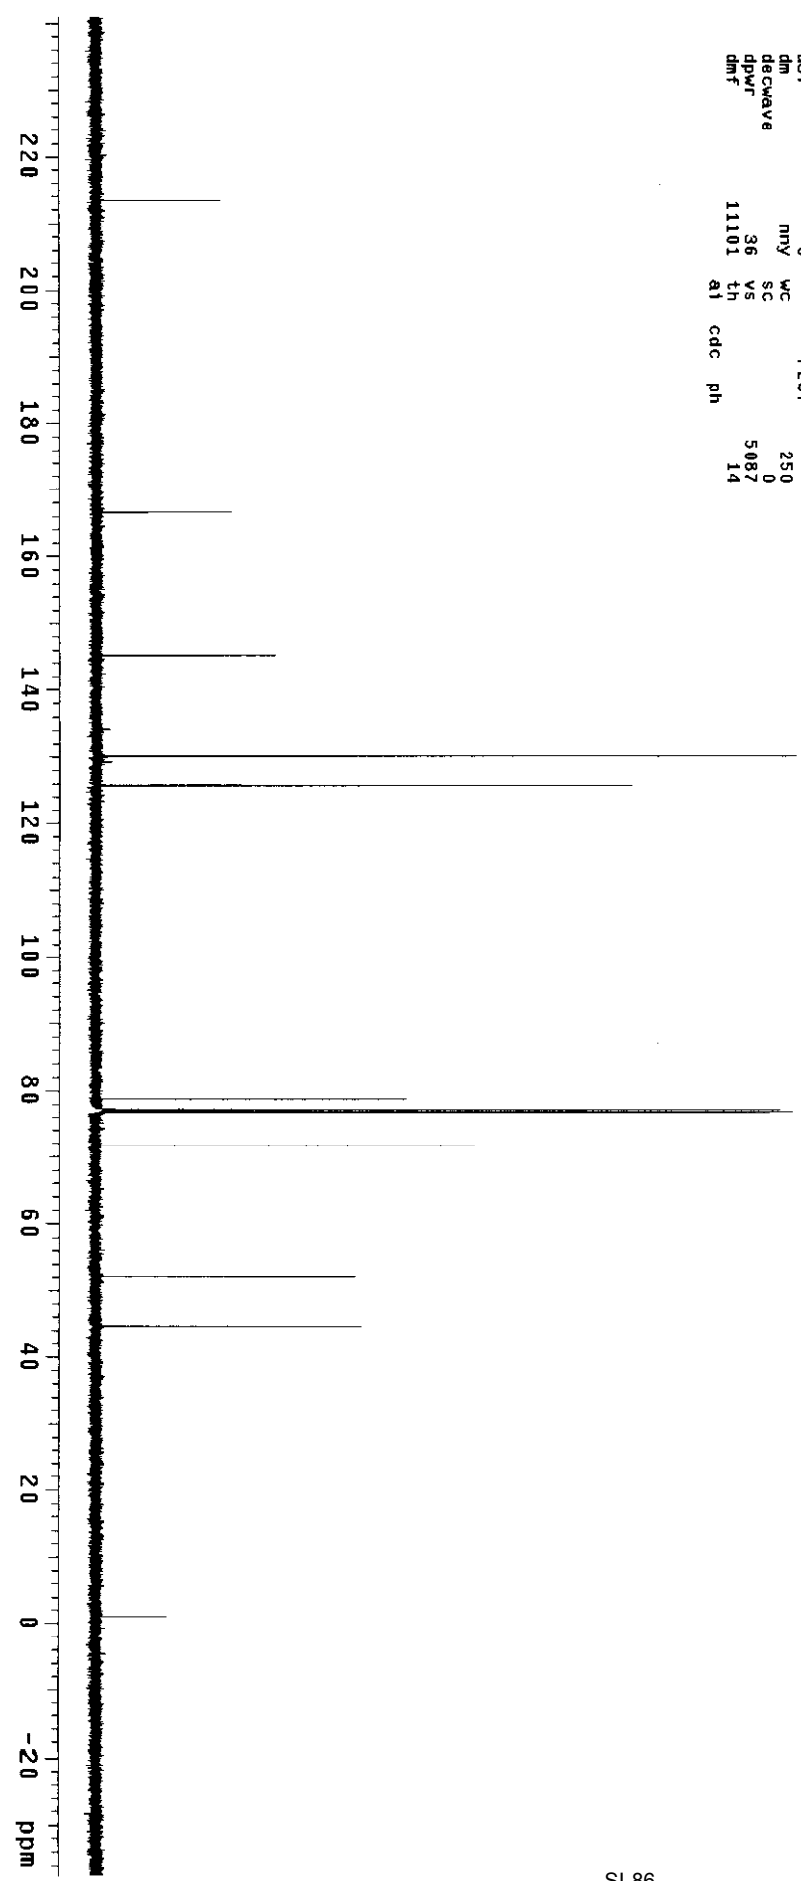

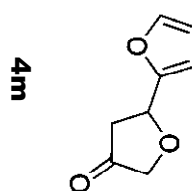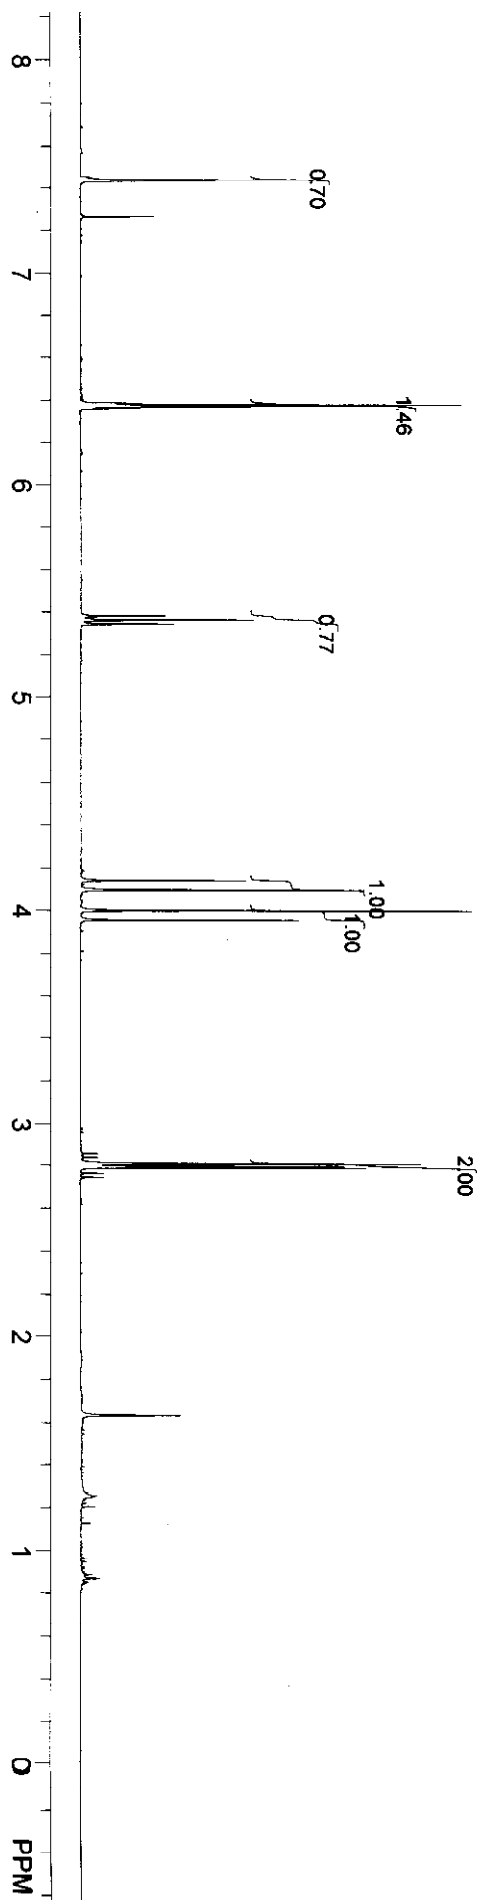

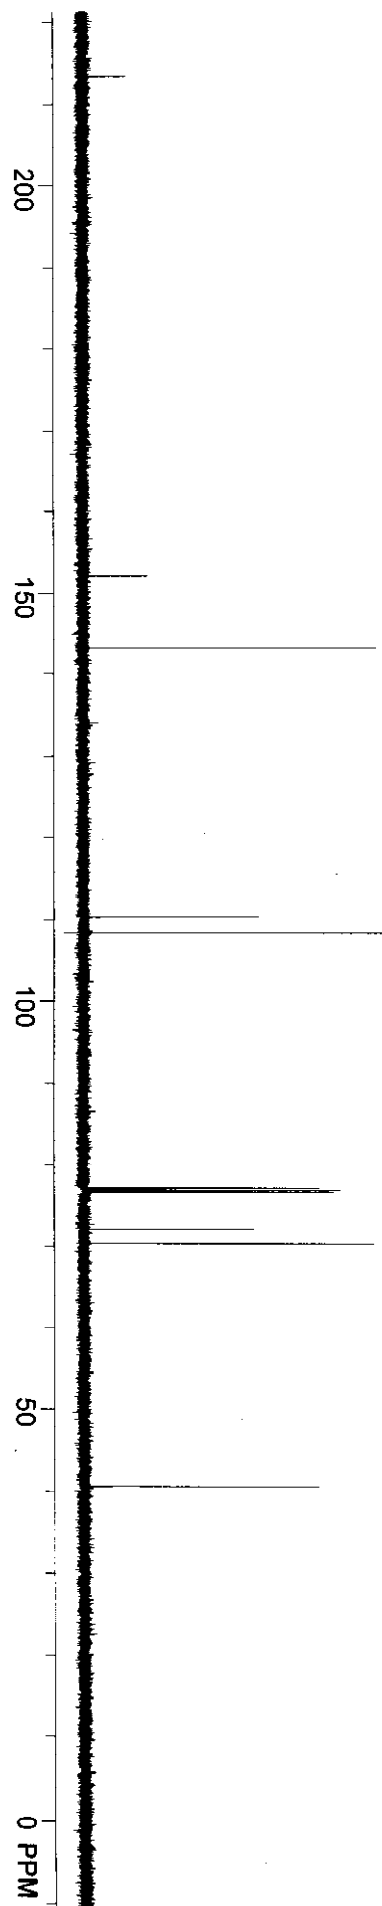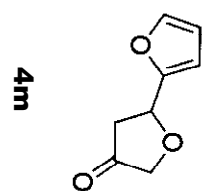



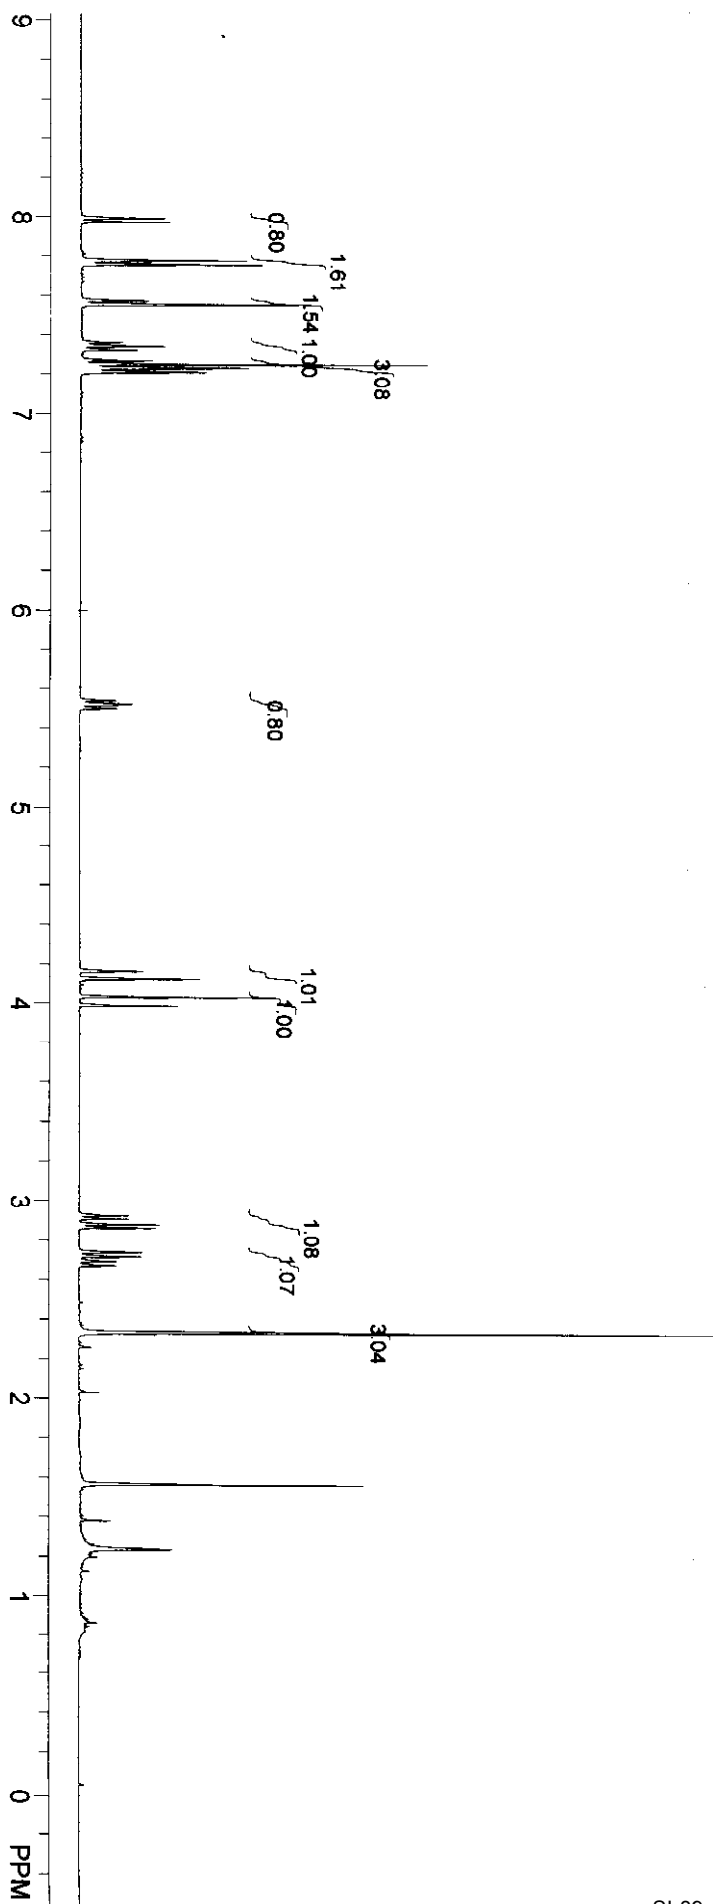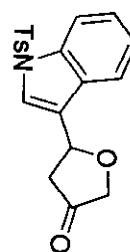

4n

y1w-3-181-c

Data Collected on:  
nmr500-Inova500  
Archive directory:  
/export/home/vnmr1/vnmrSYS/data  
Sample directory:

File: CARBON

Pulse Sequence: s2pu1  
Solvent: cdcl3  
Temp. 22.0 C / 295.1 K  
Operator: lye

Relax. delay 3.000 sec  
Pulse 58.7 degrees  
Acq. time 1.50 sec  
Width 40000.0 Hz  
2970 repetitions  
OBSERVE C13, 125.6889829 MHz  
DECUPLE H1, 499.8588575 MHz  
Power 36 dB  
on during acquisition  
off during delay  
WALTZ-16 modulated  
DATA PROCESSING  
Line broadening 0.5 Hz  
FT size 131072  
Total time 0 min

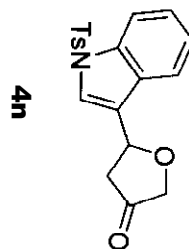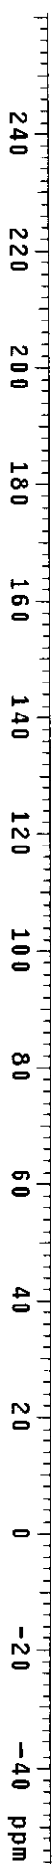

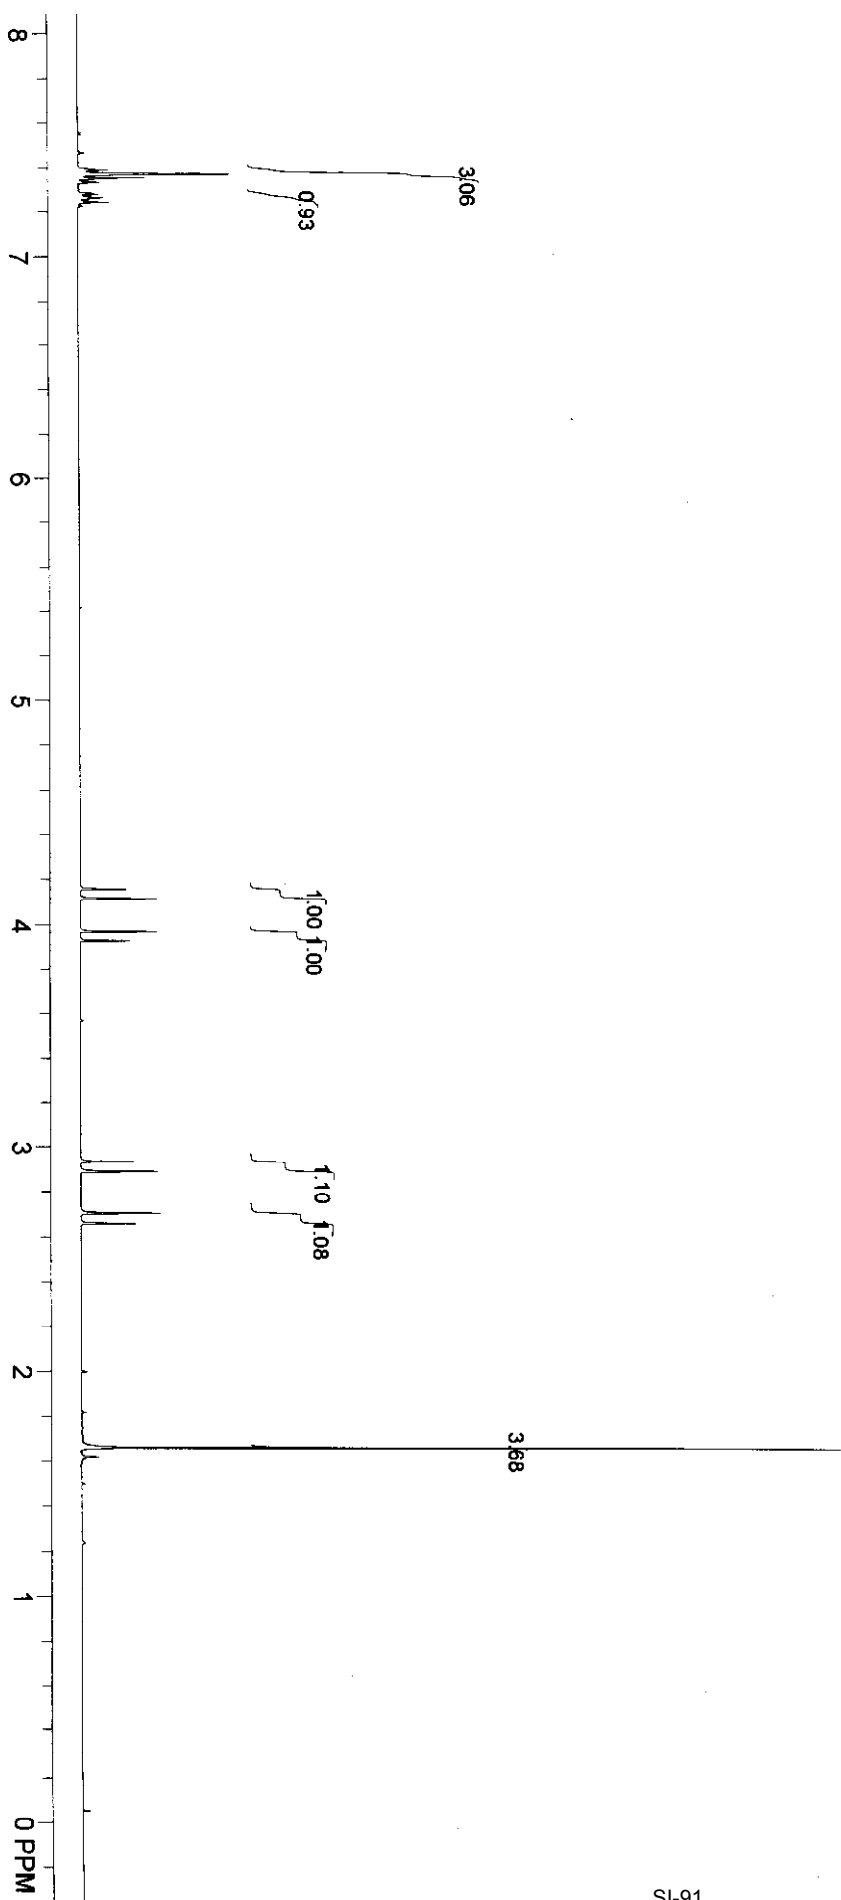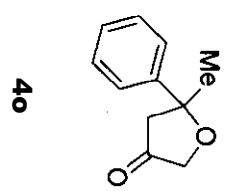

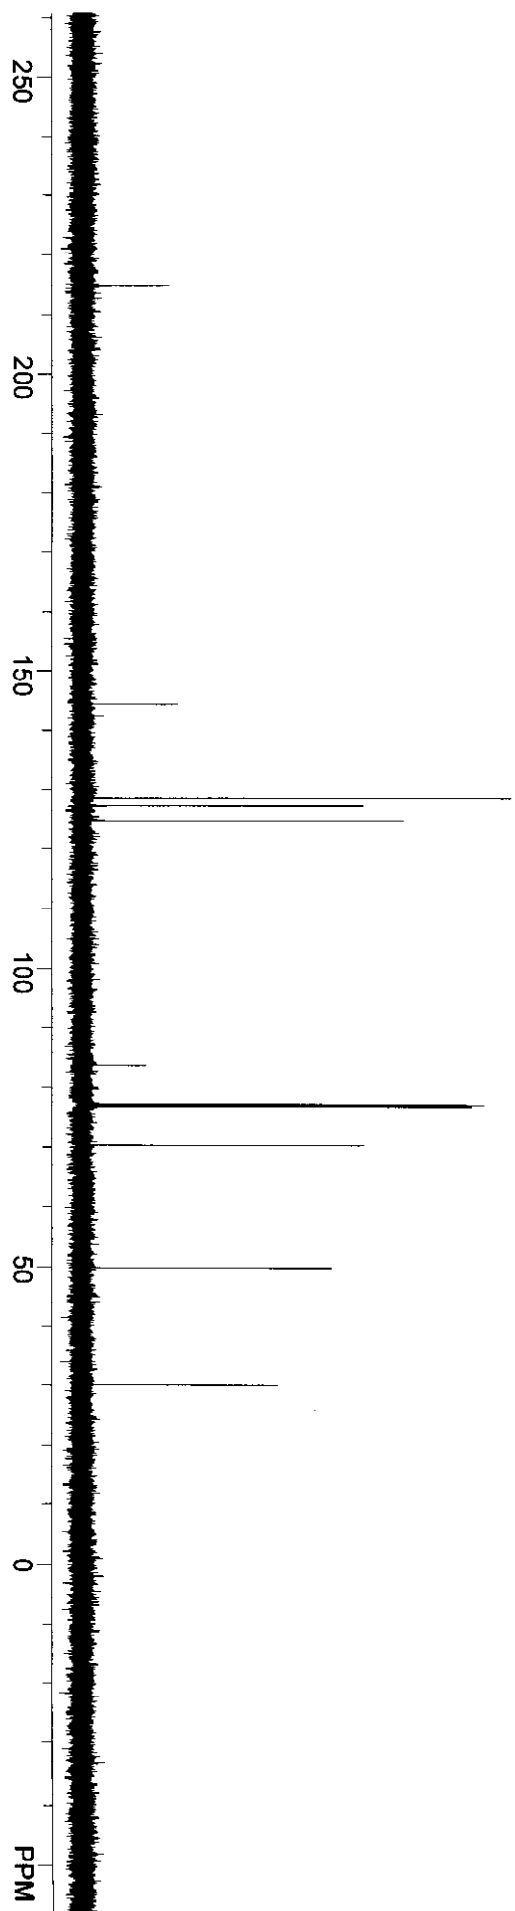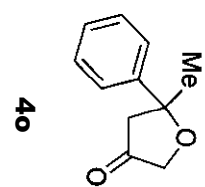

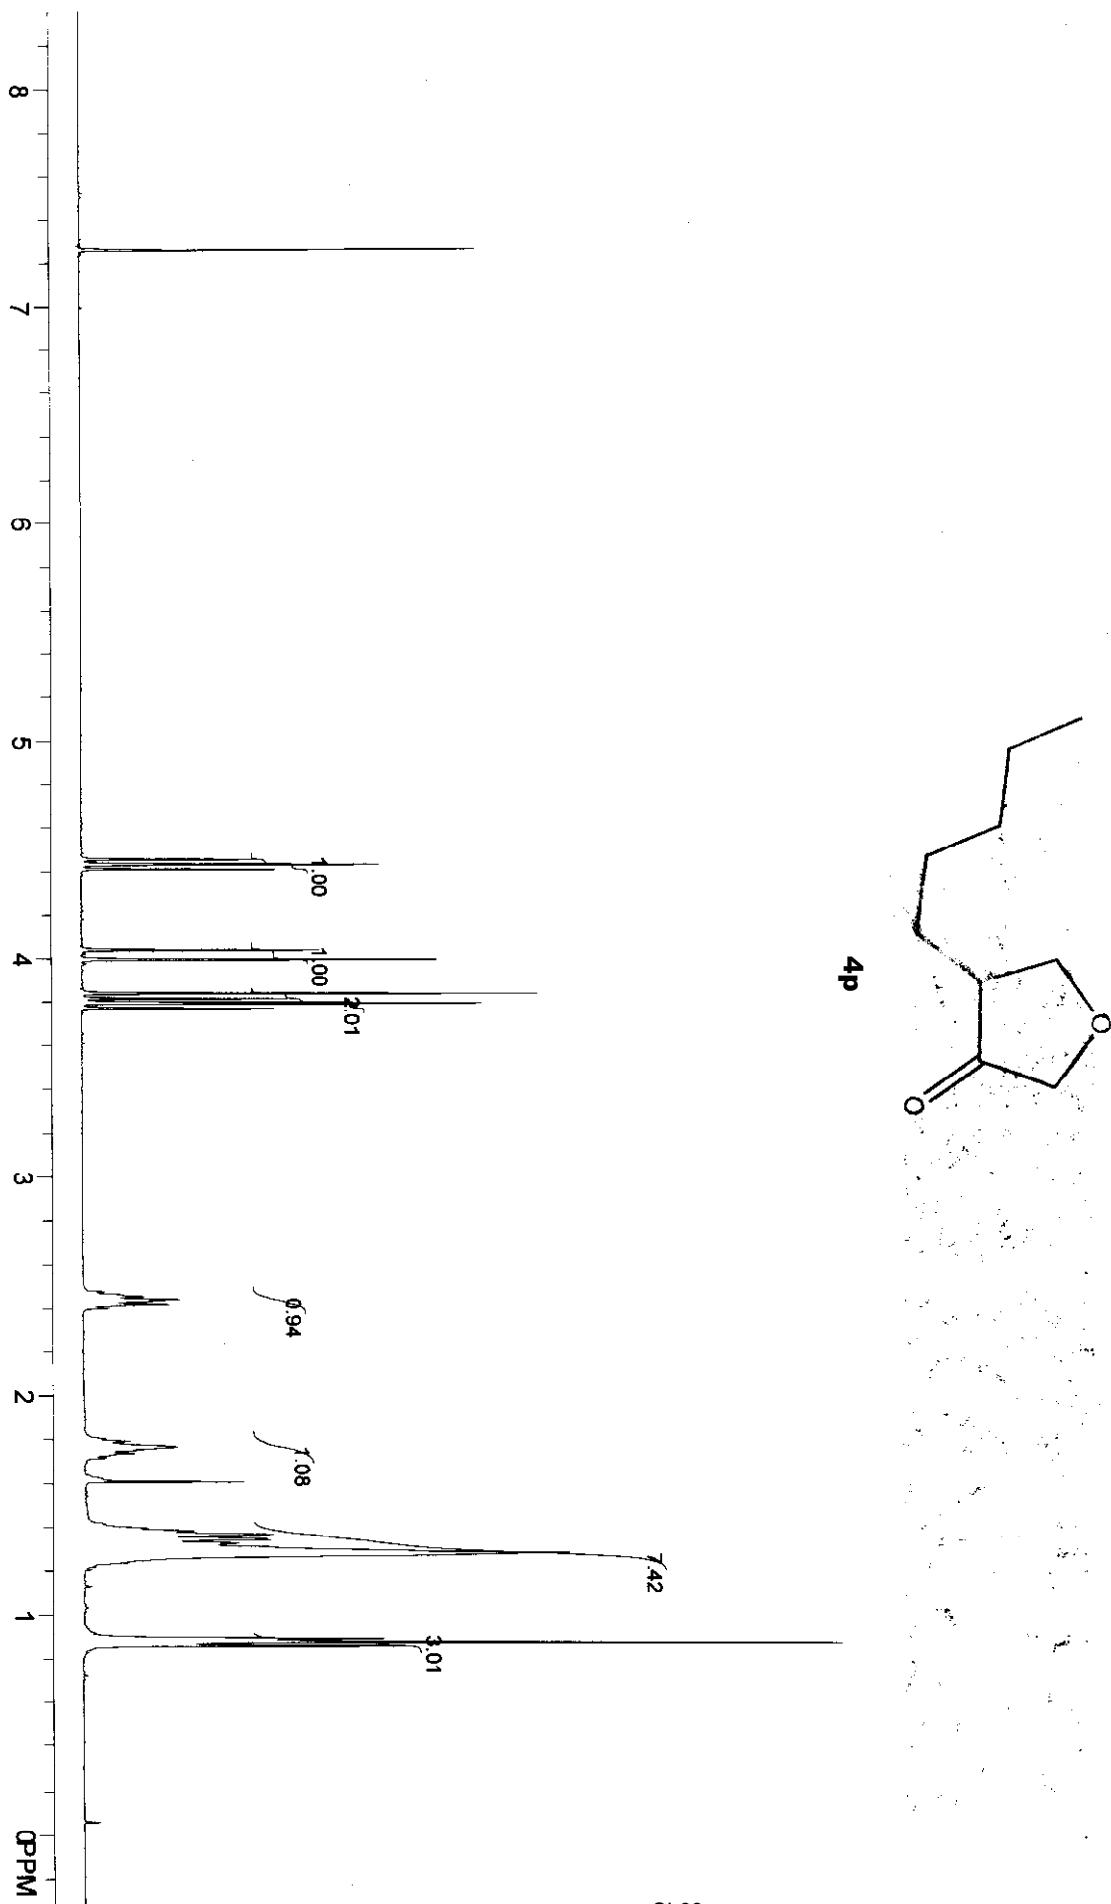

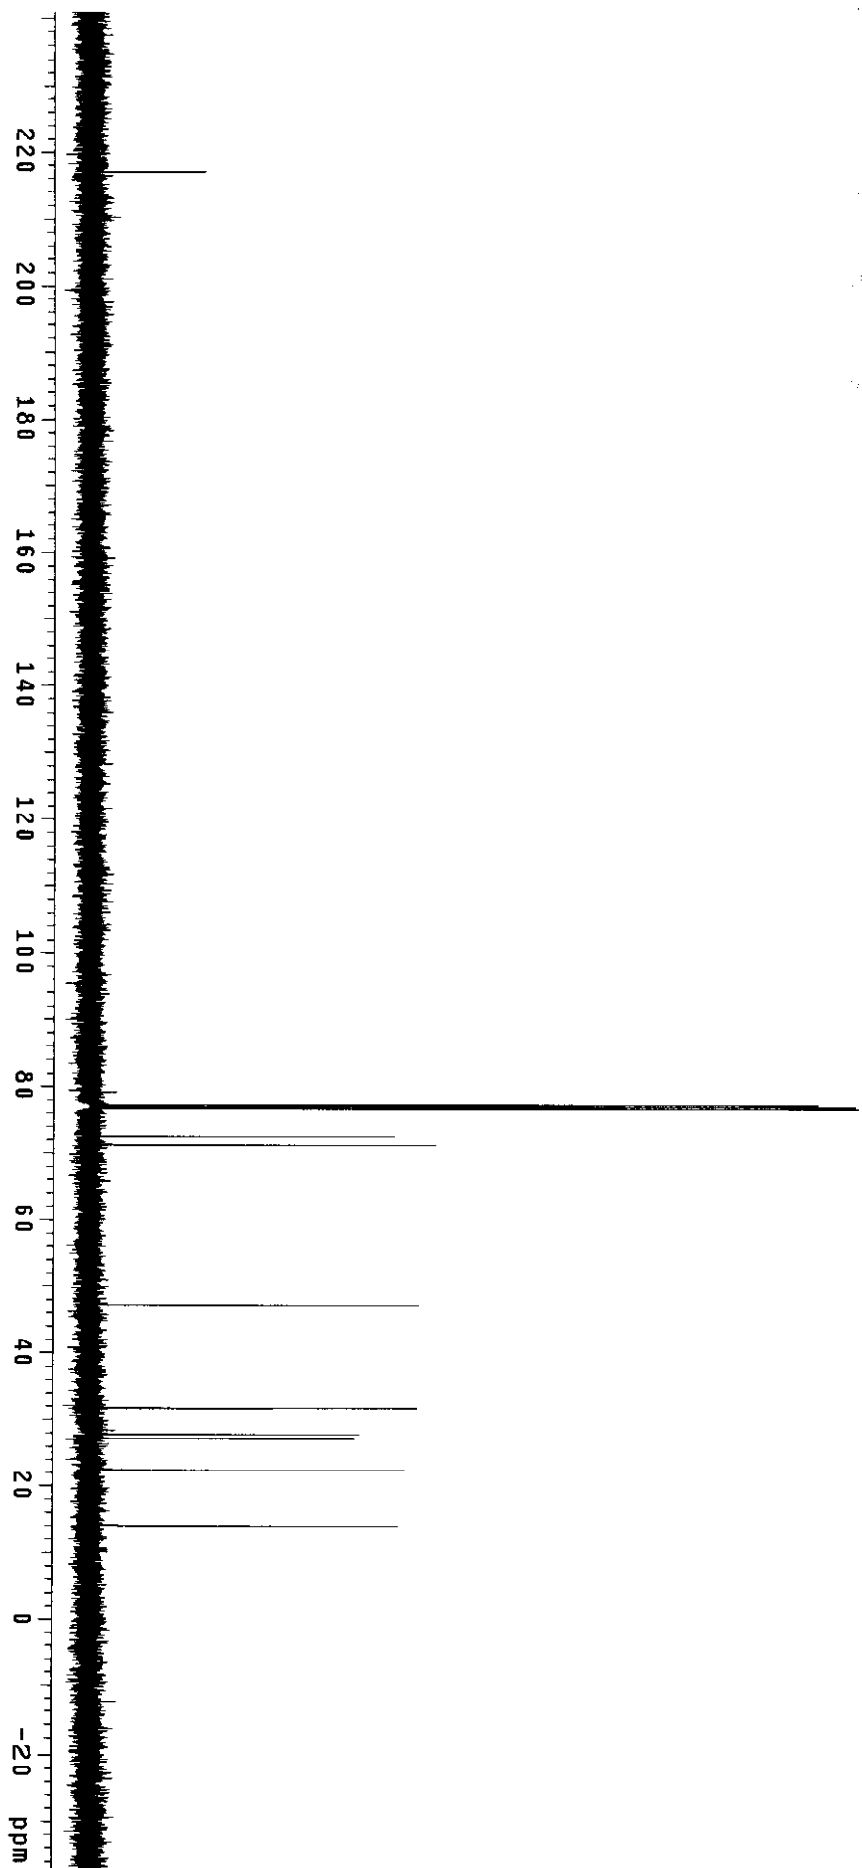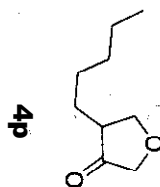

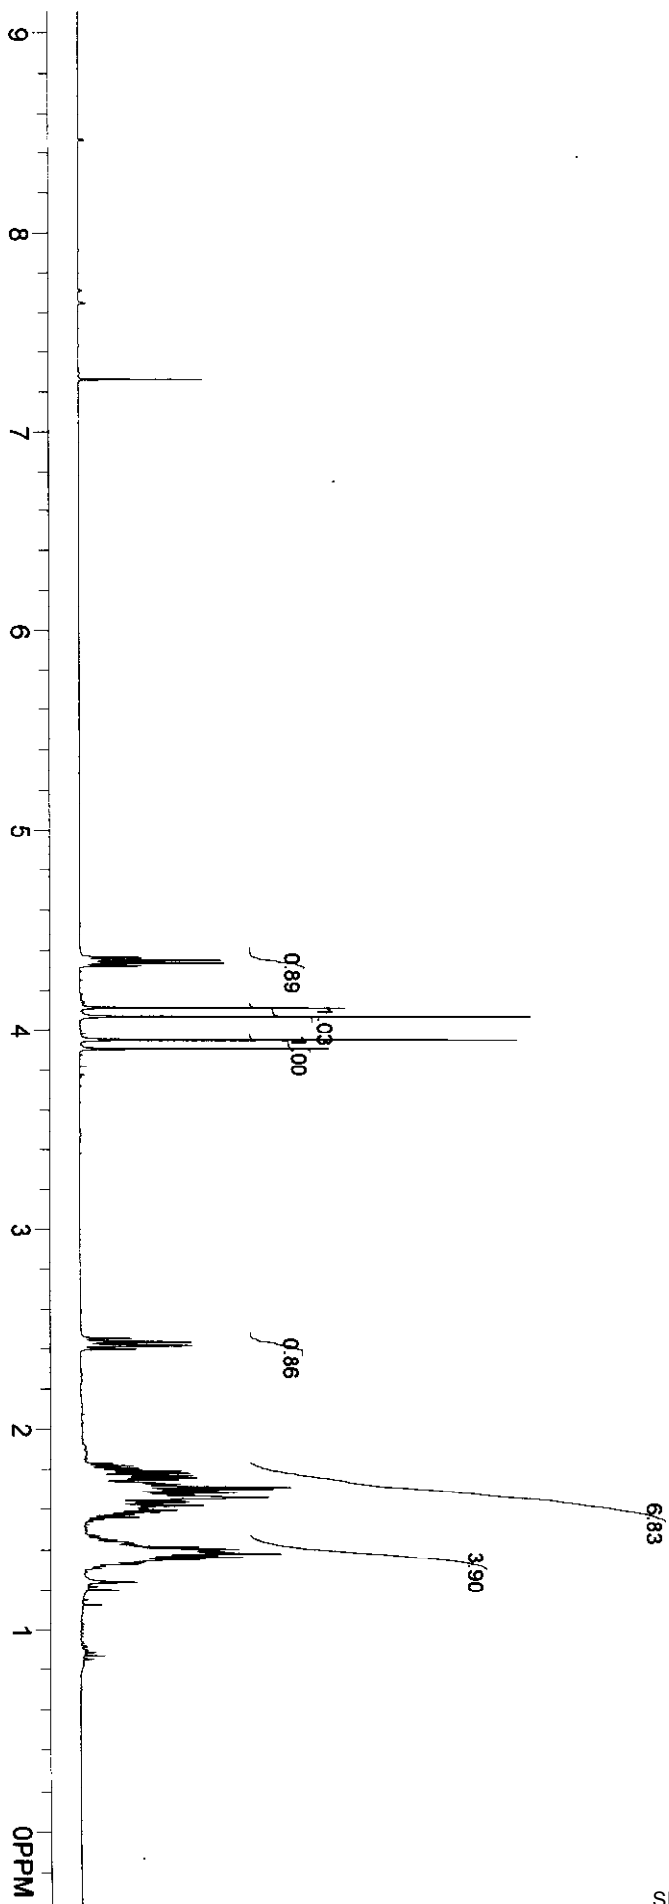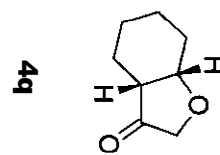

y]w-3-175-c

Data Collected on:  
 nmr500-inova500  
 Archive directory:  
 /export/home/vnmr1/vnmrsys/data  
 Sample directory:

File: CARBON

Pulse Sequence: s2pu1  
 Solvent: cdcl3  
 Temp: 22.0 C / 295.1 K  
 Operator: tye

Relax. delay: 3.000 sec  
 Pulse: 58.7 degrees  
 Acq. time: 1.50 sec  
 Width: 40000.0 Hz  
 108 repetitions  
 OBSERVE: C13, 125.6889847 MHz  
 DECOUPLE: H1, 499.8588575 MHz  
 Power: 36 dB  
 on during acquisition  
 off during delay  
 WALTZ-16 modulated  
 DATA PROCESSING  
 Line broadening: 0.5 Hz  
 FT size: 131072  
 Total time: 0 min

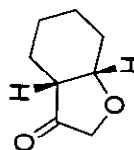

4q

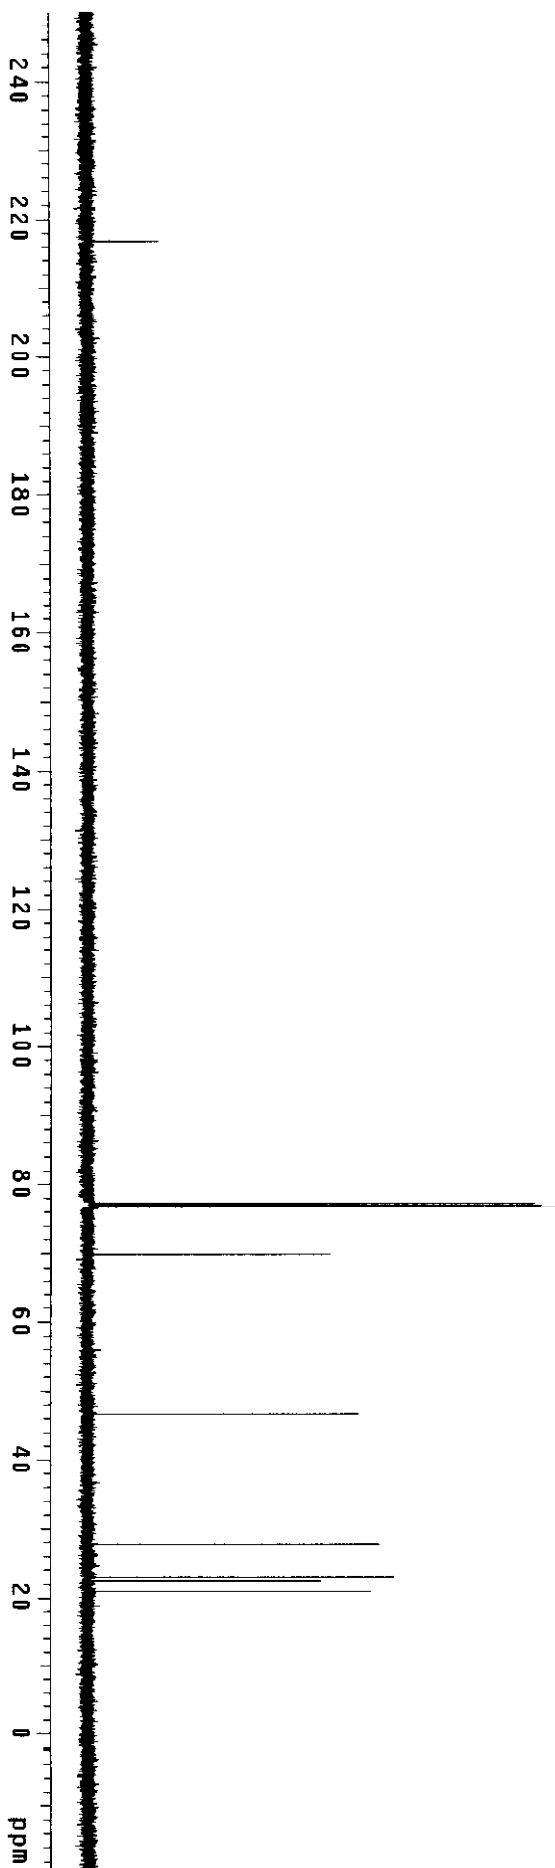



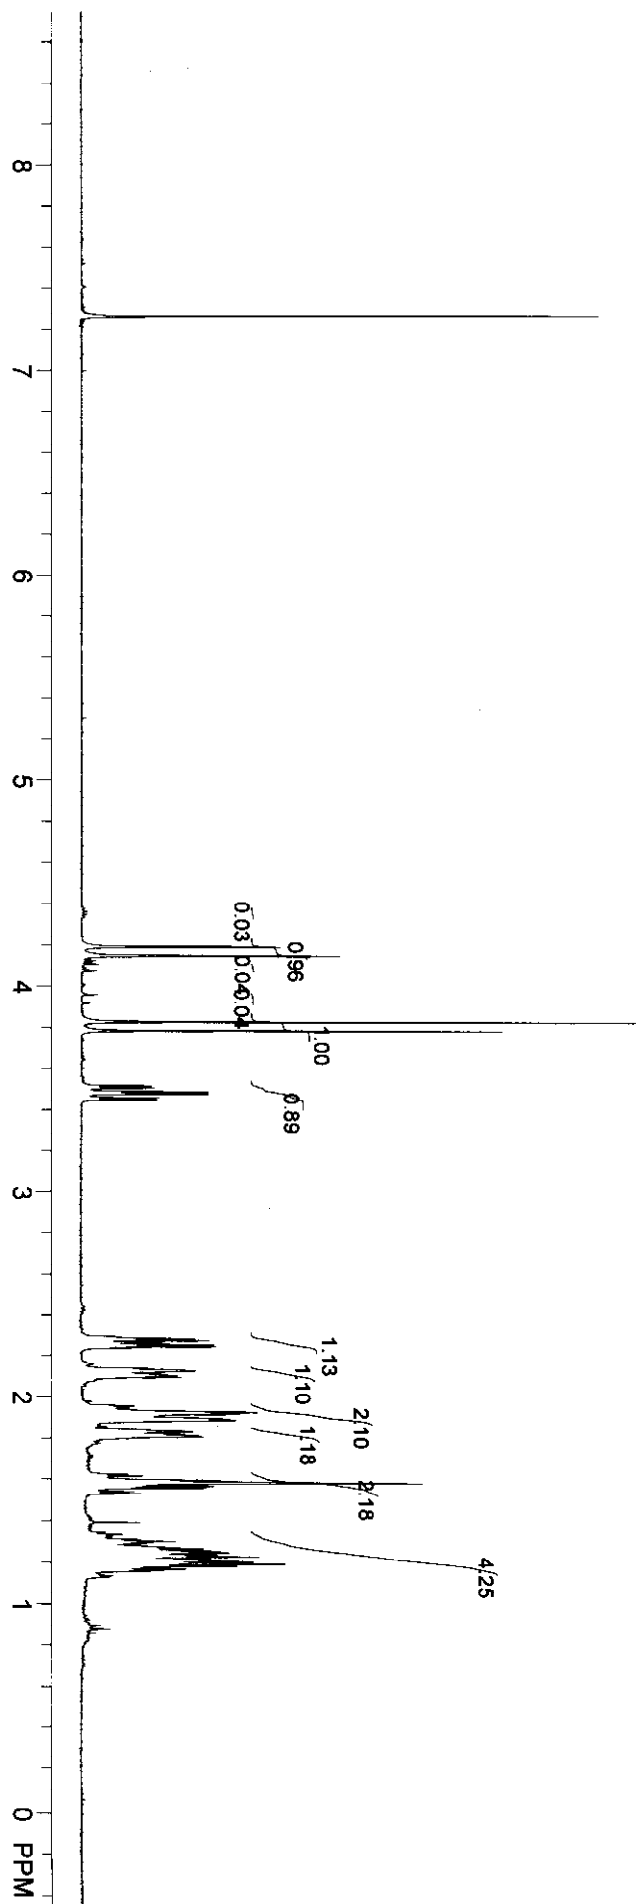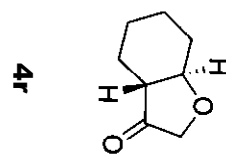

Y1W-3-167-5-c

Data Collected on:  
nmr500-1nv04500  
Archive directory:  
/export/home/vnmr1/vnmrSYS/data  
Sample directory:

File: CARBON

Pulse Sequence: szpul  
Solvent: cdcl3  
Temp. 22.0 C / 295.1 K  
Operator: lye

Relax. delay 3.000 sec  
Pulse 58.7 degrees  
Acq. time 1.300 sec  
Width 40000.0 Hz  
178 repetitions  
OBSERVE C13, 125.6888828 MHz  
DECUPLE H1, 499.8588575 MHz  
Power 36 dB  
on during acquisition  
off during delay  
WALTZ-16 modulated  
DATA PROCESSING  
Line broadening 0.5 Hz  
FT size 131072  
Total time 0 min

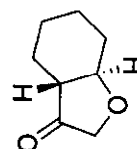

4r

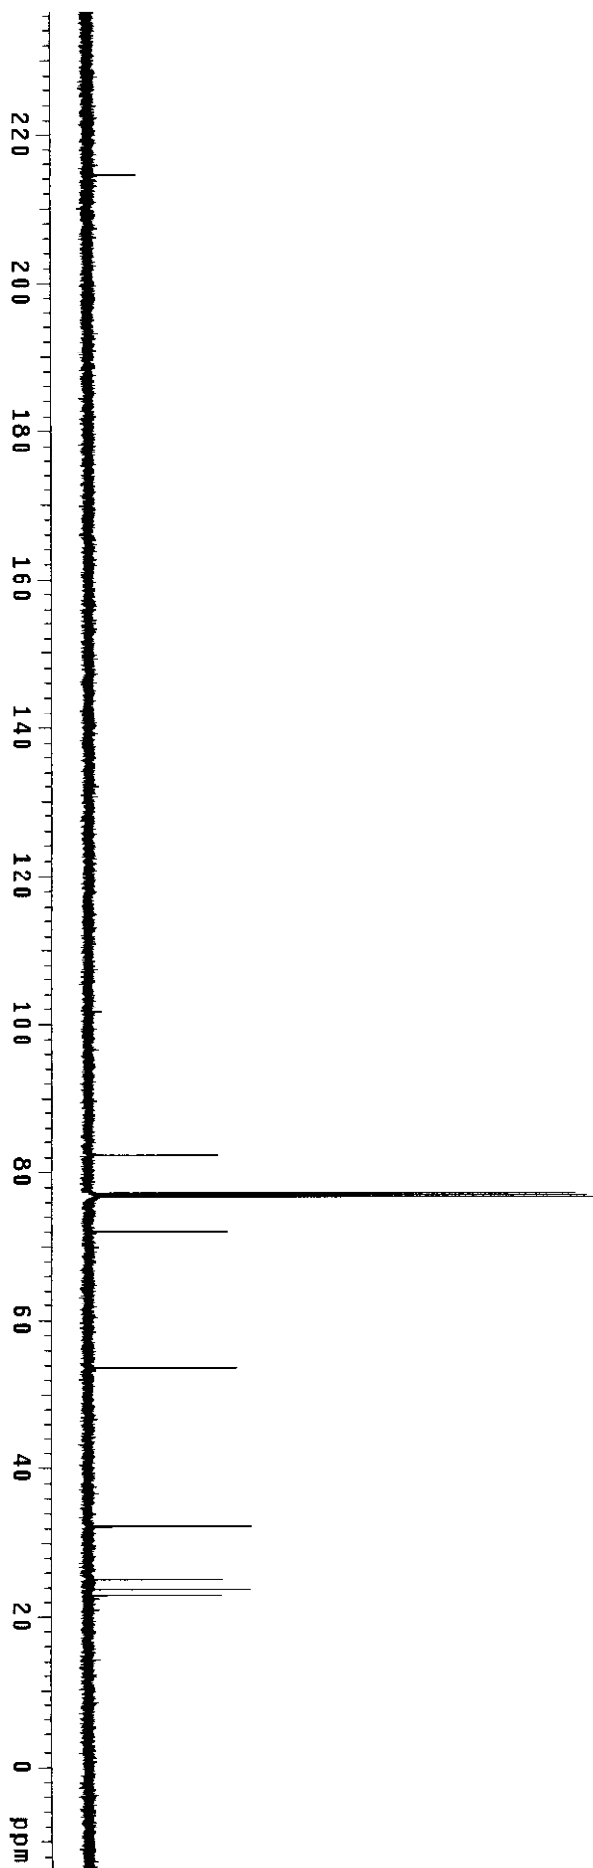

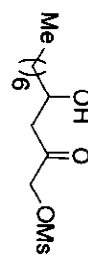

7

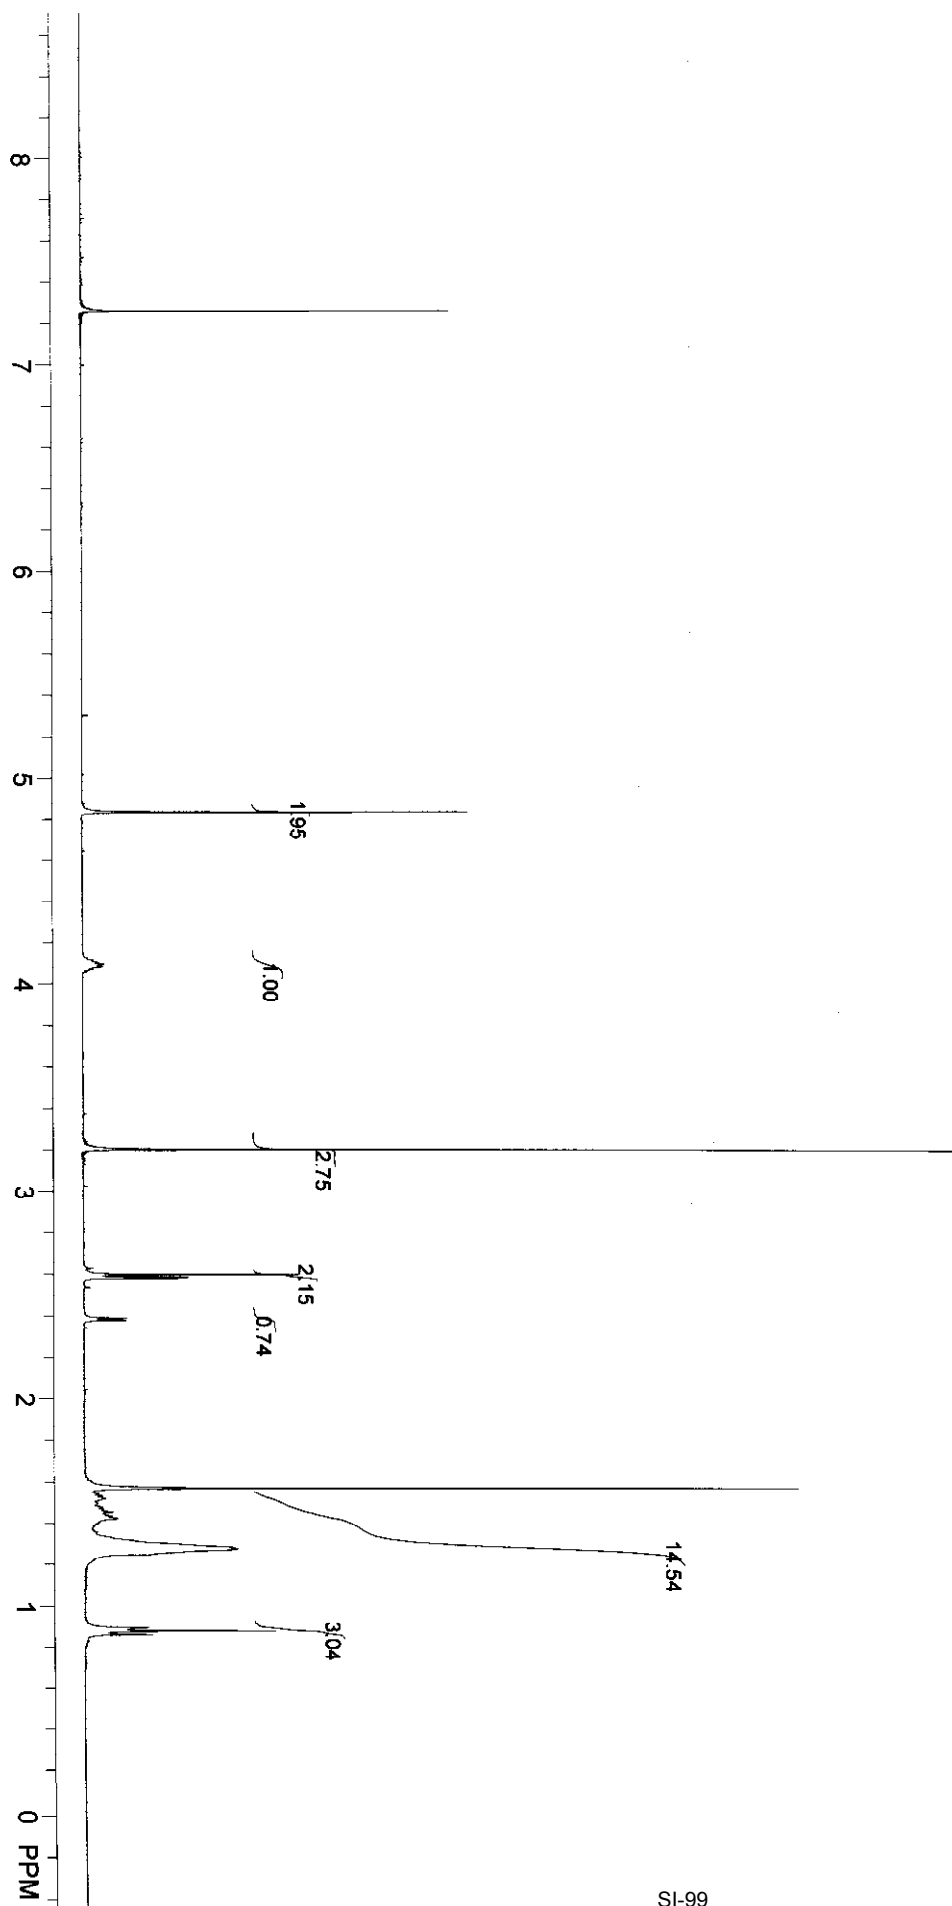

Y1W-3-182-c

Data Collected on:  
nmr500-inox500  
Archive directory:  
/export/home/yymr1/yymr5ys/data  
Sample directory:

File: CARBON

Pulse Sequence: szpu1  
Solvent: cdcl3

Temp: 22.0 C / 295.1 K  
Operator: lye

Relax. delay 3.000 sec

Pulse 58.7 degrees

Acq. time 1.300 sec

Width 40000.0 Hz

1966 repetitions

OBSERVE C13, 125.6889822 MHz

DECUPLE H1, 499.858575 MHz

Power 36 dB

on during acquisition

off during delay

WALTZ-16 modulated

DATA PROCESSING

Line broadening 0.5 Hz

FT size 131072

Total time 0 min

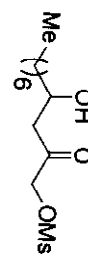

7

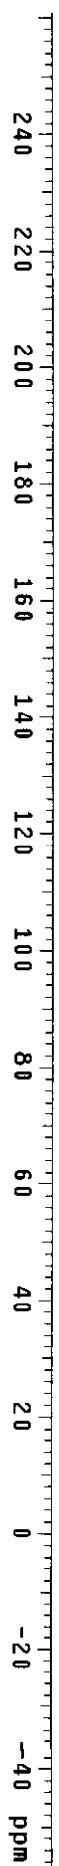

Supplement: NIHMS180767-supplement-1_si_001.pdf [file NIHMS180767-supplement-1_si_001.pdf]
